# Supplementary material for: Nickel-catalyzed aryl trifluoromethyl sulfide synthesis: a DFT study
Source: Royal Society of Chemistry journal article supplement (doi:10.1039/c9cy01365b), 2019-01-01
Supplement: c9cy01365b1.pdf [file c9cy01365b1.pdf]

## Supporting Information

Nickel-catalyzed aryl trifluoromethyl sulfides synthesis: A DFT study

Jesús Jover

*Departament de Química Inorgànica i Orgànica, Secció de Química Inorgànica and Institut de Química Teòrica i Computacional (IQTC-UB), Universitat de Barcelona, Martí i Franquès 1-11, 08028 Barcelona, Spain.*

| <b>Table of contents</b>                                                               | <b>Page</b> |
|----------------------------------------------------------------------------------------|-------------|
| Table S1. Computed relative Gibbs energies for different halobenzenes.                 | S2          |
| Table S2. Computed relative Gibbs energies for substituted iodobenzenes                | S3          |
| Computed free energy values (Hartree) for the species involved in the catalytic cycles |             |
| Table S3. Iodobenzene                                                                  | S4          |
| Table S4. Bromobenzene (species_Br)                                                    | S5          |
| Table S5. Chlorobenzene (species_Cl)                                                   | S6          |
| Table S6. 4-iodotoluene (species_pMe)                                                  | S7          |
| Table S7. Methyl 4-iodobenzoate (species_pCO2Me)                                       | S8          |
| Table S10. Computed energies of the SET calculations                                   | S9          |
| Table S11. Computed components of the SET calculations                                 | S9          |
| Optimized geometries in Cartesian coordinates for substrate:                           |             |
| Iodobenzene                                                                            | S10         |
| Bromobenzene (species_Br)                                                              | S18         |
| Chlorobenzene (species_Cl)                                                             | S23         |
| 4-iodotoluene (species_pMe)                                                            | S28         |
| Methyl 4-iodobenzoate (species_pCO2Me)                                                 | S33         |

**Table S1.** Computed relative Gibbs energies (in kcal mol<sup>-1</sup>) for different halobenzenes.

| <b>Species</b>        | <b>PhI</b> | <b>PhBr</b> | <b>PhCl</b> |
|-----------------------|------------|-------------|-------------|
| <b>A1</b>             | 0.0        | 0.0         | 0.0         |
| <b>ADTS</b>           | 13.0       | 13.7        | 15.4        |
| <b>A2</b>             | 2.9        | 3.4         | 3.8         |
| <b>OA1</b>            | 26.2       | 29.7        | 35.8        |
| <b>A3</b>             | -31.0      | -30.1       | -27.4       |
| <b>A4</b>             | -33.3      | -23.3       | -18.6       |
| <b>RE1</b>            | -1.5       | 8.5         | 13.2        |
| <b>A5</b>             | -9.2       | 0.8         | 5.5         |
| <b>SET</b>            | 26.3       | 38.4        | 57.6        |
| <b>B1</b>             | 1.3        | 11.1        | 46.4        |
| <b>MECP</b>           | 3.0        | 3.0         | 3.0         |
| <b>A1<sup>T</sup></b> | 1.4        | 1.4         | 1.4         |
| <b>B1<sup>T</sup></b> | 0.3        | 4.7         | -0.6        |
| <b>HAT</b>            | 3.6        | 11.3        | 16.3        |
| <b>B2</b>             | -6.2       | 6.1         | 7.4         |
| <b>LDTS</b>           | 8.3        | 10.3        | 11.2        |
| <b>B3</b>             | 6.7        | 8.6         | 9.0         |
| <b>B4</b>             | 3.5        | 13.5        | 18.2        |
| <b>B5</b>             | 8.1        | 18.3        | 23.3        |
| <b>OA2</b>            | 10.1       | 24.6        | 33.3        |
| <b>B6</b>             | -2.0       | 11.4        | 20.6        |
| <b>RE2</b>            | 7.9        | 21.8        | 29.2        |
| <b>B7</b>             | -1.9       | 13.9        | 20.7        |
| <b>Overall</b>        | -10.7      | -0.8        | 4.0         |

**Table S2.** Computed relative Gibbs energies (in kcal mol<sup>-1</sup>) for substituted iodobenzenes.

| <b>Species</b>        | <b>PhI</b> | <b>4-iodotoluene</b> | <b>methyl 4-iodobenzoate</b> |
|-----------------------|------------|----------------------|------------------------------|
| <b>A1</b>             | 0.0        | 0.0                  | 0.0                          |
| <b>ADTS</b>           | 13.0       | 14.8                 | -                            |
| <b>A2</b>             | 2.9        | 3.9                  | -                            |
| <b>OA1</b>            | 26.2       | 27.1                 | 26.2                         |
| <b>A3</b>             | -31.0      | -27.8                | -                            |
| <b>A4</b>             | -33.3      | -30.3                | -29.8                        |
| <b>RE1</b>            | -1.5       | 0.8                  | -1.9                         |
| <b>A5</b>             | -9.1       | -6.1                 | -                            |
| <b>SET</b>            | 26.3       | 29.0                 | -                            |
| <b>B1</b>             | 1.3        | 3.8                  | 5.6                          |
| <b>MECP</b>           | 3.0        | 3.0                  | 3.0                          |
| <b>A1<sup>T</sup></b> | 1.4        | 1.4                  | 1.4                          |
| <b>B1<sup>T</sup></b> | 0.3        | 1.7                  | 4.3                          |
| <b>HAT</b>            | 3.6        | 5.4                  | 9.8                          |
| <b>B2</b>             | -6.2       | -3.9                 | -1.3                         |
| <b>LDTS</b>           | 8.3        | 10.7                 | 13.2                         |
| <b>B3</b>             | 6.7        | 9.0                  | 11.6                         |
| <b>B4</b>             | 3.5        | 5.8                  | 8.4                          |
| <b>B5</b>             | 8.1        | 10.6                 | 14.0                         |
| <b>OA2</b>            | 10.1       | 14.4                 | 17.7                         |
| <b>B6</b>             | -2.0       | 2.8                  | 7.2                          |
| <b>RE2</b>            | 7.9        | 13.0                 | 17.5                         |
| <b>B7</b>             | -1.9       | 2.4                  | 6.0                          |
| <b>Overall</b>        | -10.7      | -9.7                 | -9.0                         |

**Table S3.** Computed free energy values (Hartree) for the species involved in the iodobenzene catalytic cycles.

| <b>Species</b>                         | <b>Free energy</b> |
|----------------------------------------|--------------------|
| PhI                                    | -527.6867          |
| PhI <sup>-</sup>                       | -527.7870          |
| Ph <sup>·</sup>                        | -231.3806          |
| I <sup>-</sup>                         | -296.4085          |
| SCF <sub>3</sub> <sup>-</sup>          | -735.9440          |
| PhSCF <sub>3</sub>                     | -967.2393          |
| 4,4'-Dimethoxy-2,2'-bipyridine (dmbpy) | -723.9392          |
| A1                                     | -2956.9852         |
| ADTS1                                  | -3484.6512         |
| A2                                     | -2760.7282         |
| OA1                                    | -2760.6910         |
| A3                                     | -2760.7822         |
| A4                                     | -3200.3213         |
| RE1                                    | -3200.2706         |
| A5                                     | -3200.2829         |
| B1                                     | -2956.8829         |
| MECP                                   | -2957.3579         |
| A1T                                    | -2956.9830         |
| B1T                                    | -3484.6714         |
| HAT                                    | -3484.6662         |
| B2                                     | -3253.3012         |
| LDTS                                   | -3253.2780         |
| B3                                     | -2529.3416         |
| B4                                     | -2968.8822         |
| B5                                     | -3496.5615         |
| OA2                                    | -3496.5584         |
| B6                                     | -3496.5776         |
| RE2                                    | -3496.5618         |
| B7                                     | -3496.5775         |
| Ni_L [Ni(dmbpy)]                       | -2232.9856         |

**Table S4.** Computed free energy values (Hartree) for the species involved in the bromobenzene catalytic cycles.

| <b>Species</b>    | <b>Free energy</b> |
|-------------------|--------------------|
| PhBr              | -649.2327          |
| PhBr <sup>-</sup> | -649.3174          |
| Br <sup>-</sup>   | -231.3806          |
| ADTS1             | -3606.1961         |
| A2                | -2882.2735         |
| OA1               | -2882.2315         |
| A3                | -2882.3268         |
| B1T               | -3606.2104         |
| HAT               | -3606.2000         |
| B2                | -3374.8277         |
| LDTS              | -3374.8210         |
| B3                | -2650.8845         |
| B5                | -3618.1072         |
| OA2               | -3618.0971         |
| B6                | -3618.1182         |
| RE2               | -3618.1016         |
| B7                | -3618.1143         |

**Table S5.** Computed free energy values (Hartree) for the species involved in the chlorobenzene catalytic cycles.

| <b>Species</b>    | <b>Free energy</b> |
|-------------------|--------------------|
| PhCl              | -691.7183          |
| PhCl <sup>-</sup> | -691.7467          |
| Cl <sup>-</sup>   | -231.3806          |
| ADTS1             | -3648.6789         |
| A2                | -2924.7583         |
| OA1               | -2924.7073         |
| A3                | -2924.8081         |
| B1T               | -3648.7045         |
| HA5               | -3648.6775         |
| B2                | -3417.3111         |
| LDTS              | -3417.3051         |
| B3                | -2693.3695         |
| B5                | -3660.5923         |
| OA2               | -3660.5764         |
| B6                | -3660.5967         |
| RE2               | -3660.5829         |
| B7                | -3660.5964         |

**Table S6.** Computed free energy values (Hartree) for the species involved in the 4-iodotoluene catalytic cycles.

| <b>Species</b>                | <b>Free energy</b> |
|-------------------------------|--------------------|
| <i>p</i> MePhI                | -566.9625          |
| <i>p</i> MePhI <sup>-</sup>   | -567.0588          |
| <i>p</i> MePh <sup>·</sup>    | -270.6527          |
| <i>p</i> MePhSCF <sub>3</sub> | -1006.5135         |
| ADTS1                         | -3523.9242         |
| A2                            | -2800.0023         |
| OA1                           | -2799.9653         |
| A3                            | -2800.0529         |
| A4                            | -3239.5925         |
| RE1                           | -3239.5429         |
| A5                            | -3239.5538         |
| B1T                           | -3523.9450         |
| HAT                           | -3523.9391         |
| B5                            | -3535.8370         |
| OA2                           | -3535.8311         |
| B6                            | -3535.8495         |
| RE2                           | -3535.8333         |
| B7                            | -3535.8501         |

**Table S7.** Computed free energy values (Hartree) for the species involved in the methyl 4-iodotoluene catalytic cycles.

| <b>Species</b>                                | <b>Free energy</b> |
|-----------------------------------------------|--------------------|
| <i>p</i> CO <sub>2</sub> MePhI                | -755.4656          |
| <i>p</i> CO <sub>2</sub> MePhI <sup>-</sup>   | -755.5591          |
| <i>p</i> CO <sub>2</sub> MePh <sup>·</sup>    | -459.1517          |
| <i>p</i> CO <sub>2</sub> MePhSCF <sub>3</sub> | -1195.0155         |
| OA1                                           | -2988.4699         |
| A4                                            | -3428.0947         |
| RE1                                           | -3428.0503         |
| B1T                                           | -3712.4440         |
| HAT                                           | -3712.4352         |
| B5                                            | -3724.3388         |
| OA2                                           | -3724.3329         |
| B6                                            | -3724.3497         |
| RE2                                           | -3724.3333         |
| B7                                            | -3724.3515         |

**Table S10.** Computed energies of the SET calculations.

| Species                                                               | Free energy |
|-----------------------------------------------------------------------|-------------|
| A1                                                                    | -2956.9852  |
| A1 <sup>+</sup> with A1 geometry                                      | -2956.8766  |
| A1 <sup>+</sup> with the solvent cavity of A1                         | -2956.8563  |
| -----                                                                 |             |
| PhI                                                                   | -527.6867   |
| PhI <sup>-</sup> with PhBr geometry                                   | -527.7390   |
| PhI <sup>-</sup> with the solvent cavity of PhI                       | -527.7082   |
| -----                                                                 |             |
| PhBr                                                                  | -649.2327   |
| PhBr <sup>-</sup> with PhI geometry                                   | -649.2753   |
| PhBr <sup>-</sup> with the solvent cavity of PhBr                     | -649.2201   |
| -----                                                                 |             |
| PhCl                                                                  | -691.7183   |
| PhCl <sup>-</sup> with PhCl geometry                                  | -691.7576   |
| PhCl <sup>-</sup> with the solvent cavity of PhCl                     | -691.7263   |
| -----                                                                 |             |
| <i>p</i> MePhI                                                        | -566.9625   |
| <i>p</i> MePhI <sup>-</sup> with <i>p</i> MePhI geometry              | -567.0104   |
| <i>p</i> MePhI <sup>-</sup> with the solvent cavity of <i>p</i> MePhI | -566.9799   |

**Table S11.** Computed components of the SET calculations.

| Substrate      | $\lambda_S$ | $\lambda_N$ | $\lambda$ | $\Delta G$ | $\Delta G^\ddagger$ |
|----------------|-------------|-------------|-----------|------------|---------------------|
| PhI            | 67.4        | 35.3        | 102.7     | 1.3        | 26.3                |
| PhBr           | 41.5        | 88.8        | 130.3     | 11.1       | 38.4                |
| PhCl           | 43.5        | 75.9        | 119.4     | 46.4       | 57.6                |
| <i>p</i> MePhI | 38.1        | 70.0        | 108.1     | 3.8        | 29.0                |

## Optimized geometries

|                                  |                                 |                                  |
|----------------------------------|---------------------------------|----------------------------------|
| Substrate: Iodobenzene           | H 4.179559 -5.516694 0.924696   | H -4.471523 5.318206 1.400516    |
|                                  | H 5.822488 -5.259183 1.617624   | C -4.929238 -4.610293 -2.112445  |
| 57                               | H 4.363680 -4.840585 2.588714   | H -5.965767 -4.905379 -2.320180  |
| A1                               | C 4.897586 4.806015 -1.510807   | H -4.348619 -4.594523 -3.050042  |
| N 1.462605 -1.187941 0.510691    | H 4.272833 5.448741 -0.867645   | H -4.472203 -5.317794 -1.400310  |
| N 1.490571 1.158703 -0.553295    | H 5.929392 5.180163 -1.523191   | C 4.929246 4.610346 -2.112307    |
| C 1.365458 -2.467625 0.961319    | H 4.490115 4.793306 -2.535945   | H 4.472210 5.317839 -1.400164    |
| C 2.452790 -3.311737 1.175226    |                                 | H 5.965775 4.905434 -2.320036    |
| C 3.755058 -2.822409 0.880697    | 57                              | H 4.348628 4.594586 -3.049905    |
| C 3.813889 2.762638 -0.864009    | A1T                             | C 4.928596 -4.610773 2.112561    |
| C 2.525792 3.270812 -1.187559    | N 1.533394 1.235691 -0.425848   | H 4.471517 -5.318247 1.400428    |
| C 1.422208 2.441045 -1.002552    | N 1.533216 -1.235833 0.425634   | H 5.965089 -4.905950 2.320344    |
| C 2.740061 -0.711252 0.230338    | C 1.454116 2.473023 -0.960311   | H 4.347956 -4.594926 3.050145    |
| C 3.884761 -1.514967 0.395095    | C 2.555132 3.240624 -1.350854   |                                  |
| C 3.914027 1.451663 -0.380946    | C 3.848236 2.670353 -1.190514   | 41                               |
| C 2.754947 0.663480 -0.245686    | C 3.847842 -2.670707 1.190597   | A2                               |
| H 0.351463 -2.812696 1.171038    | C 2.554669 -3.240891 1.350707   | Ni -0.044011 -0.949897 -0.561633 |
| H 2.284111 -4.313683 1.566778    | C 1.453770 -2.473191 0.960036   | N -1.995665 -1.047071 -0.257881  |
| H 2.380400 4.276177 -1.579906    | C 2.795412 0.673291 -0.275893   | N -0.356784 0.986552 -0.300571   |
| H 0.418486 2.800840 -1.235361    | C 3.959429 1.381131 -0.654630   | C -2.780096 -2.148520 -0.245590  |
| Ni -0.000013 -0.000081 -0.028770 | C 3.959210 -1.381479 0.654765   | C -4.163783 -2.123923 -0.041998  |
| N -1.462533 1.187823 0.510859    | C 2.795311 -0.673534 0.275876   | C -4.783254 -0.872586 0.166162   |
| N -1.490662 -1.158796 -0.553175  | H 0.442621 2.866851 -1.078726   | C -1.117462 3.683243 0.073921    |
| C -1.365300 2.467551 0.961353    | H 2.400536 4.235199 -1.764199   | C 0.231444 3.341450 -0.161882    |
| C -2.740027 0.711171 0.230621    | H 2.399941 -4.235483 1.763963   | C 0.549424 1.990996 -0.339710    |
| C -1.422367 -2.441117 -1.002517  | H 0.442231 -2.866954 1.078279   | C -2.602869 0.169407 -0.050305   |
| C -2.754992 -0.663579 -0.245377  | Ni 0.000000 -0.000001 0.000020  | C -3.979345 0.286955 0.161057    |
| C -2.452578 3.311748 1.175201    | N -1.533392 -1.235676 -0.425901 | C -2.076697 2.649343 0.118316    |
| H -0.351278 2.812584 1.170997    | N -1.533217 1.235815 0.425673   | C -1.671076 1.325569 -0.072691   |
| C -3.884676 1.514949 0.395364    | C -1.454112 -2.472990 -0.960406 | H -2.262428 -3.094898 -0.406686  |
| C -2.525994 -3.270843 -1.187467  | C -2.795411 -0.673282 -0.275931 | H -4.723901 -3.057195 -0.048588  |
| H -0.418678 -2.800904 -1.235476  | C -1.453773 2.473155 0.960117   | H 1.023098 4.087342 -0.205712    |
| C -3.914096 -1.451732 -0.380527  | C -2.795313 0.673524 0.275885   | H 1.580925 1.687410 -0.517280    |
| C -3.754882 2.822458 0.880771    | C -2.555126 -3.240580 -1.350975 | H 3.325564 -2.192172 2.082851    |
| H -2.283812 4.313738 1.566606    | H -0.442616 -2.866810 -1.078833 | C 2.634892 -2.303508 1.246165    |
| C -3.814040 -2.762679 -0.863696  | C -3.959427 -1.381111 -0.654692 | C 1.677095 -3.379634 1.245946    |
| H -2.380664 -4.276185 -1.579894  | C -2.554673 3.240845 1.350801   | C 2.676053 -1.453572 0.159400    |
| H -4.890415 -1.056663 -0.098566  | H -0.442233 2.866909 1.078384   | C 0.825859 -3.569366 0.169941    |
| H -4.872907 1.134239 0.135926    | C -3.959213 1.381461 0.654785   | C 1.777596 -1.531849 -0.967741   |
| H 4.872959 -1.134231 0.135573    | C -3.848231 -2.670317 -1.190616 | C 0.817319 -2.658015 -0.955099   |
| H 4.890386 1.056593 -0.099129    | H -2.400528 -4.235141 -1.764352 | H 0.149984 -4.429721 0.155624    |
| O -4.979282 -3.470021 -0.976029  | C -3.847847 2.670671 1.190658   | H 2.114368 -1.107781 -1.921946   |
| O -4.907095 3.545234 1.024066    | H -2.399946 4.235423 1.764091   | H 0.436209 -3.043553 -1.912345   |
| O 4.979113 3.469996 -0.976466    | H -4.946414 0.930366 0.557056   | I 4.220843 0.113005 0.109931     |
| O 4.907325 -3.545087 1.024093    | H -4.946579 -0.929941 -0.556820 | H 1.654960 -4.060662 2.100994    |
| C -4.897942 -4.805644 -1.511399  | H 4.946581 0.929956 -0.556772   | H -4.448075 1.256361 0.324357    |
| H -5.929789 -5.179668 -1.523992  | H 4.946410 -0.930378 0.557061   | H -3.120206 2.902640 0.300788    |
| H -4.490531 -4.792167 -2.536548  | O -5.013888 3.290290 1.539292   | O -6.110991 -0.683308 0.375276   |
| H -4.273204 -5.448911 -0.868762  | O -5.014364 -3.289826 -1.539143 | O -1.582936 4.943662 0.264925    |
| C -4.795790 4.872706 1.574090    | O 5.013882 -3.290332 1.539225   | C -0.624823 6.026277 0.232681    |
| H -5.822150 5.259378 1.617596    | O 5.014370 3.289872 -1.539020   | H -0.132181 6.077536 -0.751886   |
| H -4.363163 4.840897 2.588472    | C -4.928607 4.610725 2.112640   | H -1.209937 6.936994 0.409898    |
| H -4.179349 5.516821 0.924343    | H -5.965100 4.905901 2.320419   | H 0.129424 5.898764 1.026215     |
| C 4.796120 -4.872509 1.574257    | H -4.347972 4.594871 3.050228   | C -6.960156 -1.853276 0.399132   |

|    |           |           |           |    |           |           |           |      |           |           |           |
|----|-----------|-----------|-----------|----|-----------|-----------|-----------|------|-----------|-----------|-----------|
| H  | -6.667658 | -2.526458 | 1.221673  | C  | -2.652009 | -3.041069 | -0.193742 | H    | -1.325132 | -3.280492 | 0.639808  |
| H  | -7.974903 | -1.471675 | 0.565998  | C  | -1.377654 | -2.487646 | -0.344287 | H    | 3.064832  | -2.283495 | -1.226959 |
| H  | -6.909747 | -2.388191 | -0.563266 | C  | -1.799623 | 1.111713  | -0.035110 | C    | 2.653220  | -1.750654 | -0.367659 |
|    |           |           |           | C  | -2.730568 | 2.144092  | 0.091555  | C    | 3.025167  | -0.376602 | -0.136020 |
| 41 |           |           |           | C  | -3.484857 | -0.779239 | 0.063576  | C    | 1.803392  | -2.390396 | 0.519027  |
| A3 |           |           |           | C  | -2.176276 | -0.316726 | -0.095812 | C    | 2.538695  | 0.316591  | 0.970996  |
| Ni | 0.690694  | -0.366425 | 0.001521  | H  | 1.033989  | 2.804868  | -0.129748 | C    | 1.218009  | -1.698679 | 1.651418  |
| N  | -0.165347 | 1.393838  | 0.010346  | H  | -0.485971 | 4.735037  | 0.098764  | H    | 1.565409  | -3.447067 | 0.364363  |
| N  | -1.245157 | -0.987908 | -0.002960 | H  | -2.772796 | -4.121462 | -0.237758 | C    | 1.616028  | -0.303387 | 1.885205  |
| C  | 0.448642  | 2.602147  | 0.006744  | H  | -0.512972 | -3.130847 | -0.506822 | H    | 2.869607  | 1.340445  | 1.161790  |
| C  | -0.225697 | 3.823282  | -0.030163 | C  | 2.297130  | 0.737074  | -0.245242 | H    | 0.854211  | -2.313037 | 2.486297  |
| C  | -1.635105 | 3.812074  | -0.071456 | C  | 2.761150  | 1.071655  | 1.046594  | H    | 1.521139  | 0.146167  | 2.882621  |
| C  | -4.023894 | -1.500110 | 0.065890  | C  | 2.979725  | 1.259980  | -1.364904 | S    | 4.089705  | 0.473226  | -1.297869 |
| C  | -3.094291 | -2.560282 | 0.056277  | C  | 3.869755  | 1.925438  | 1.215288  | C    | 5.745148  | -0.059374 | -0.707787 |
| C  | -1.732944 | -2.246760 | 0.022874  | H  | 2.255899  | 0.673788  | 1.931024  | F    | 6.701670  | 0.574829  | -1.451583 |
| C  | -1.542258 | 1.385522  | -0.017434 | C  | 4.081087  | 2.123764  | -1.197840 | F    | 5.983355  | 0.243096  | 0.604133  |
| C  | -2.290329 | 2.564006  | -0.061719 | H  | 2.653937  | 0.999863  | -2.375726 | F    | 5.968716  | -1.404300 | -0.828342 |
| C  | -3.531946 | -0.178595 | 0.039370  | C  | 4.530603  | 2.460433  | 0.093253  | H    | -4.185585 | 1.933869  | -0.726284 |
| C  | -2.152409 | 0.040336  | 0.003761  | H  | 4.213123  | 2.172540  | 2.224431  | H    | -4.777502 | -0.094093 | -0.835921 |
| H  | 1.534638  | 2.587425  | 0.033322  | H  | 4.591897  | 2.525680  | -2.078159 | O    | -5.540086 | -2.522340 | -1.059521 |
| H  | 0.353539  | 4.744237  | -0.029879 | H  | 5.389482  | 3.124118  | 0.222913  | O    | -3.555694 | 4.406578  | -0.588305 |
| H  | -3.399356 | -3.604431 | 0.075929  | S  | 1.869343  | -2.019583 | -1.020065 | C    | -3.095553 | 5.773001  | -0.473035 |
| H  | -0.991633 | -3.044015 | 0.016728  | C  | 2.725205  | -2.541815 | 0.462133  | H    | -2.187321 | 5.926183  | -1.078429 |
| C  | 2.432756  | 0.365646  | 0.075291  | F  | 3.942292  | -1.930052 | 0.695460  | H    | -3.916370 | 6.389172  | -0.859818 |
| C  | 3.011386  | 0.672383  | 1.326599  | F  | 2.010379  | -2.364128 | 1.634298  | H    | -2.894733 | 6.024614  | 0.581075  |
| C  | 3.124499  | 0.730795  | -1.100465 | F  | 3.018367  | -3.895735 | 0.410234  | C    | -5.862352 | -3.928215 | -1.164726 |
| C  | 4.243205  | 1.354092  | 1.400526  | H  | -3.797679 | 1.937004  | 0.143213  | H    | -5.829666 | -4.407414 | -0.172931 |
| H  | 2.501382  | 0.386654  | 2.250950  | H  | -4.314238 | -0.095477 | 0.235076  | H    | -6.881986 | -3.963114 | -1.567388 |
| C  | 4.355919  | 1.412822  | -1.027065 | O  | -3.246293 | 4.426553  | 0.268979  | H    | -5.163868 | -4.432727 | -1.852102 |
| H  | 2.703251  | 0.488729  | -2.080089 | O  | -5.026455 | -2.546205 | 0.176047  |      |           |           |           |
| C  | 4.919480  | 1.729128  | 0.224001  | C  | -2.826467 | 5.810759  | 0.355985  | 69   |           |           |           |
| H  | 4.674720  | 1.586768  | 2.378822  | H  | -2.290171 | 6.107844  | -0.559288 | ADTS |           |           |           |
| H  | 4.876307  | 1.690366  | -1.948709 | H  | -3.753971 | 6.386945  | 0.456110  | N    | 2.320090  | 1.059987  | -0.269234 |
| H  | 5.876117  | 2.254849  | 0.281571  | H  | -2.185679 | 5.961060  | 1.239248  | N    | 1.962269  | -1.517596 | 0.379274  |
| I  | 1.845257  | -2.680025 | -0.124693 | C  | -5.325879 | -3.963018 | 0.123405  | C    | 2.511592  | 2.384759  | -0.464682 |
| H  | -3.377669 | 2.539619  | -0.093794 | H  | -6.410364 | -4.034692 | 0.269099  | C    | 3.756977  | 3.010571  | -0.536818 |
| H  | -4.239976 | 0.647721  | 0.055707  | H  | -5.043944 | -4.378112 | -0.857428 | C    | 4.915976  | 2.212743  | -0.376540 |
| O  | -2.426715 | 4.906760  | -0.120065 | H  | -4.797930 | -4.497001 | 0.929518  | C    | 3.889030  | -3.482461 | -0.331008 |
| O  | -5.368359 | -1.640163 | 0.102184  |    |           |           |           | C    | 2.609794  | -3.857575 | 0.148601  |
| C  | -1.784788 | 6.205466  | -0.140656 | 45 |           |           |           | C    | 1.706064  | -2.841762 | 0.466060  |
| H  | -2.604927 | 6.932672  | -0.173278 | A5 |           |           |           | C    | 3.456083  | 0.279720  | -0.174855 |
| H  | -1.183907 | 6.350836  | 0.771036  | Ni | -0.164677 | -0.445870 | 1.056465  | C    | 4.748934  | 0.831246  | -0.195651 |
| H  | -1.150379 | 6.304978  | -1.035900 | N  | -1.121726 | 1.225834  | 0.605426  | C    | 4.176346  | -2.113725 | -0.453133 |
| C  | -5.906912 | -2.983833 | 0.163824  | N  | -1.819530 | -1.284195 | 0.386932  | C    | 3.214452  | -1.162426 | -0.072679 |
| H  | -6.995300 | -2.856138 | 0.201738  | C  | -0.680126 | 2.498871  | 0.722013  | H    | 1.606671  | 2.979177  | -0.580616 |
| H  | -5.622252 | -3.554389 | -0.734688 | C  | -1.424371 | 3.623755  | 0.351822  | H    | 3.809884  | 4.082937  | -0.714811 |
| H  | -5.550352 | -3.497658 | 1.070795  | C  | -2.716200 | 3.421909  | -0.180365 | H    | 2.321622  | -4.898568 | 0.282420  |
|    |           |           |           | C  | -4.314786 | -2.189671 | -0.580954 | H    | 0.708919  | -3.114277 | 0.818743  |
| 45 |           |           |           | C  | -3.330061 | -3.108512 | -0.158166 | Ni   | 0.532225  | 0.132898  | 0.243595  |
| A4 |           |           |           | C  | -2.113088 | -2.602470 | 0.309774  | N    | -0.804765 | 1.799577  | -0.029742 |
| Ni | 0.689599  | -0.239960 | -0.386006 | C  | -2.380703 | 1.033606  | 0.085209  | N    | -0.814008 | -0.649954 | -1.099338 |
| N  | -0.446818 | 1.351168  | -0.112555 | C  | -3.192367 | 2.099931  | -0.311405 | C    | -0.637837 | 3.077865  | 0.363711  |
| N  | -1.120198 | -1.163662 | -0.305959 | C  | -4.025077 | -0.810584 | -0.509363 | C    | -1.737094 | 1.568576  | -1.010862 |
| C  | -0.038430 | 2.641174  | -0.062717 | C  | -2.782897 | -0.392100 | -0.025148 | C    | -0.874267 | -1.929103 | -1.529528 |
| C  | -0.902207 | 3.730392  | 0.067092  | H  | 0.324156  | 2.612782  | 1.131949  | C    | -1.877802 | 0.165385  | -1.422034 |
| C  | -2.288065 | 3.481887  | 0.146653  | H  | -0.994788 | 4.615846  | 0.477372  | C    | -1.349390 | 4.168971  | -0.142551 |
| C  | -3.739140 | -2.166351 | 0.013153  | H  | -3.487844 | -4.185025 | -0.187342 | H    | 0.102013  | 3.229632  | 1.149528  |

|    |           |           |           |     |           |           |           |    |           |           |           |
|----|-----------|-----------|-----------|-----|-----------|-----------|-----------|----|-----------|-----------|-----------|
| C  | -2.475649 | 2.605355  | -1.607713 | C   | -3.948240 | -1.380524 | -0.630277 | C  | 1.422077  | -2.512274 | 1.227169  |
| C  | -1.939117 | -2.479696 | -2.246188 | C   | -2.787271 | -0.682662 | -0.287812 | C  | 2.744841  | 0.600938  | -0.108509 |
| H  | -0.013197 | -2.550661 | -1.286844 | H   | -0.433280 | 2.839459  | 1.145742  | C  | 3.897616  | 1.274932  | -0.569659 |
| C  | -3.007429 | -0.314785 | -2.102514 | H   | -2.392220 | 4.208542  | 1.823822  | C  | 3.923235  | -1.458039 | 0.791455  |
| C  | -2.297965 | 3.926055  | -1.164762 | H   | -2.402014 | -4.204635 | -1.825658 | C  | 2.752445  | -0.741106 | 0.458440  |
| H  | -1.174423 | 5.164423  | 0.261565  | H   | -0.439706 | -2.838258 | -1.151780 | H  | 0.391144  | 2.814904  | -0.835143 |
| C  | -3.052596 | -1.653349 | -2.523218 | Ni  | 0.000001  | -0.000146 | -0.002579 | H  | 2.330858  | 4.136809  | -1.643025 |
| H  | -1.892909 | -3.519634 | -2.563587 | N   | 1.534191  | -1.222150 | 0.464235  | H  | 2.380880  | -4.274366 | 2.013797  |
| H  | -3.862784 | 0.333574  | -2.288331 | N   | 1.536631  | 1.219161  | -0.468062 | H  | 0.412369  | -2.889302 | 1.399792  |
| H  | -3.167200 | 2.402912  | -2.424897 | C   | 1.445113  | -2.455038 | 1.009094  | Ni | -0.045628 | -0.046413 | 0.261016  |
| H  | 5.625196  | 0.198558  | -0.057231 | C   | 2.785774  | -0.687030 | 0.286978  | N  | -1.593198 | -1.296376 | -0.081250 |
| H  | 5.138231  | -1.803006 | -0.859840 | C   | 1.450147  | 2.452053  | -1.013349 | N  | -1.570486 | 1.212900  | 0.658814  |
| O  | -4.183313 | -2.051905 | -3.164725 | C   | 2.787197  | 0.682679  | -0.287834 | C  | -1.523406 | -2.548734 | -0.581741 |
| O  | -3.049667 | 4.880470  | -1.776903 | C   | 2.548998  | -3.223392 | 1.389101  | C  | -2.845297 | -0.706614 | 0.012516  |
| O  | 4.869109  | -4.347998 | -0.705794 | H   | 0.433652  | -2.840115 | 1.144834  | C  | -1.482039 | 2.464029  | 1.158917  |
| O  | 6.193370  | 2.679484  | -0.377438 | C   | 3.945104  | -1.386171 | 0.632347  | C  | -2.835143 | 0.658915  | 0.519365  |
| C  | -4.263793 | -3.432550 | -3.563528 | C   | 2.555751  | 3.219174  | -1.390856 | C  | -2.626517 | -3.300372 | -0.991348 |
| H  | -5.247833 | -3.546933 | -4.035765 | H   | 0.439402  | 2.838198  | -1.151372 | H  | -0.518760 | -2.966482 | -0.662914 |
| H  | -3.470174 | -3.680738 | -4.288164 | C   | 3.948097  | 1.380592  | -0.630420 | C  | -4.010920 | -1.394706 | -0.391957 |
| H  | -4.187027 | -4.100582 | -2.689206 | C   | 3.836951  | -2.678073 | 1.191427  | C  | -2.577907 | 3.251297  | 1.521548  |
| C  | -2.858728 | 6.243026  | -1.355477 | H   | 2.392763  | -4.208786 | 1.823216  | H  | -0.468108 | 2.852147  | 1.272978  |
| H  | -3.541957 | 6.841767  | -1.971194 | C   | 3.842654  | 2.672600  | -1.189749 | C  | -3.994634 | 1.386728  | 0.867452  |
| H  | -3.110231 | 6.366737  | -0.288789 | H   | 2.401565  | 4.204627  | -1.825564 | C  | -3.910835 | -2.698036 | -0.894419 |
| H  | -1.818354 | 6.567637  | -1.527699 | H   | 4.936891  | 0.948125  | -0.486093 | H  | -2.480152 | -4.307115 | -1.377281 |
| C  | 6.378445  | 4.099596  | -0.521357 | H   | 4.934676  | -0.954699 | 0.490429  | C  | -3.875238 | 2.690055  | 1.367159  |
| H  | 5.888396  | 4.645867  | 0.302151  | H   | -4.934610 | 0.955223  | 0.490164  | H  | -2.416379 | 4.254936  | 1.909608  |
| H  | 7.463409  | 4.260448  | -0.482758 | H   | -4.937029 | -0.948064 | -0.485890 | H  | -4.984573 | 0.940379  | 0.776774  |
| H  | 5.983002  | 4.454871  | -1.487609 | O   | 5.008215  | 3.287134  | -1.498355 | H  | -4.988442 | -0.915258 | -0.346698 |
| C  | 4.583545  | -5.755006 | -0.602029 | O   | 5.001080  | -3.293793 | 1.503071  | H  | 4.878486  | 0.802198  | -0.524871 |
| H  | 3.728891  | -6.032223 | -1.242140 | O   | -5.008601 | -3.286972 | -1.498061 | H  | 4.909818  | -1.020029 | 0.642306  |
| H  | 5.490439  | -6.266302 | -0.949154 | O   | -5.000715 | 3.294153  | 1.502882  | O  | -5.037238 | 3.329356  | 1.688773  |
| H  | 4.370393  | -6.039193 | 0.442020  | C   | 4.944610  | 4.615770  | -2.071295 | O  | -5.076070 | -3.297795 | -1.276363 |
| H  | -0.163583 | -1.677242 | 1.955092  | H   | 5.987918  | 4.905284  | -2.245233 | O  | 4.993400  | -3.371268 | 1.646449  |
| C  | -0.381731 | -0.624186 | 2.114431  | H   | 4.390716  | 4.598944  | -3.023582 | O  | 4.934634  | 3.148461  | -1.545858 |
| C  | -1.719099 | -0.228487 | 2.359406  | H   | 4.467233  | 5.314958  | -1.365783 | C  | -4.943367 | 4.656273  | 2.246812  |
| C  | 0.659592  | 0.283552  | 2.516539  | C   | 4.934681  | -4.622325 | 2.075898  | H  | -5.978419 | 4.964242  | 2.442522  |
| C  | -2.066776 | 1.016641  | 2.881032  | H   | 5.977269  | -4.912931 | 2.252317  | H  | -4.369824 | 4.645220  | 3.188739  |
| C  | 0.317641  | 1.520178  | 3.120532  | H   | 4.378587  | -4.604941 | 3.026895  | H  | -4.473641 | 5.350172  | 1.529760  |
| H  | 1.684833  | -0.082282 | 2.585838  | H   | 4.458255  | -5.321045 | 1.369277  | C  | -4.995503 | -4.619721 | -1.847640 |
| C  | -1.024822 | 1.890103  | 3.275717  | C   | -4.934212 | 4.622605  | 2.075895  | H  | -6.030374 | -4.897682 | -2.085093 |
| H  | -1.284234 | 2.856487  | 3.715035  | H   | -4.457405 | 5.321301  | 1.369509  | H  | -4.388095 | -4.612175 | -2.768213 |
| I  | -3.308229 | -1.601355 | 1.720311  | H   | -5.976785 | 4.913432  | 2.252037  | H  | -4.571003 | -5.335033 | -1.123449 |
| H  | -3.109756 | 1.305850  | 3.012455  | H   | -4.378391 | 4.604962  | 3.027046  | C  | 4.839698  | 4.463442  | -2.130474 |
| H  | 1.112292  | 2.191558  | 3.455415  | C   | -4.945202 | -4.615712 | -2.070780 | H  | 4.423752  | 5.184513  | -1.406966 |
| 57 |           |           |           | H   | -4.468043 | -5.314861 | -1.365079 | H  | 5.869542  | 4.742890  | -2.387208 |
| B1 |           |           |           | H   | -5.988545 | -4.905038 | -2.244812 | H  | 4.217947  | 4.443879  | -3.041216 |
| N  | -1.534042 | 1.221840  | 0.464725  | H   | -4.391168 | -4.599173 | -3.022991 | C  | 4.917601  | -4.691637 | 2.222670  |
| N  | -1.536753 | -1.219210 | -0.468240 | 69  |           |           |           | H  | 4.423555  | -5.392302 | 1.528849  |
| C  | -1.444806 | 2.454647  | 1.009733  | B1T |           |           |           | H  | 5.958296  | -4.998719 | 2.387375  |
| C  | -2.548594 | 3.223242  | 1.389546  | N   | 1.488831  | 1.182589  | -0.196161 | H  | 4.375315  | -4.669806 | 3.182639  |
| C  | -3.836624 | 2.678250  | 1.191450  | N   | 1.493322  | -1.284450 | 0.670329  | C  | -1.429202 | -0.199904 | -7.457449 |
| C  | -3.842941 | -2.672525 | -1.189643 | C   | 1.400760  | 2.410391  | -0.750854 | C  | -0.260118 | 0.124644  | -8.169244 |
| C  | -2.556100 | -3.219174 | -1.390933 | C   | 2.490849  | 3.148974  | -1.215821 | C  | 0.930543  | 0.394125  | -7.470364 |
| C  | -1.450418 | -2.452090 | -1.013579 | C   | 3.780249  | 2.557420  | -1.119935 | C  | 0.958151  | 0.341407  | -6.062992 |
| C  | -2.785698 | 0.687013  | 0.287102  | C   | 3.821045  | -2.739913 | 1.347286  | C  | -0.217548 | 0.015544  | -5.368009 |
| C  | -3.944938 | 1.386409  | 0.632262  | C   | 2.529487  | -3.288759 | 1.577445  | C  | -1.414047 | -0.257448 | -6.049934 |
|    |           |           |           |     |           |           |           | H  | -2.358965 | -0.409962 | -7.992402 |

|    |           |           |           |    |           |           |           |    |           |           |           |  |  |  |  |
|----|-----------|-----------|-----------|----|-----------|-----------|-----------|----|-----------|-----------|-----------|--|--|--|--|
| H  | -0.276782 | 0.167306  | -9.260663 | C  | 4.909494  | 4.490097  | -2.073493 | C  | 1.433027  | 0.814982  | -0.106310 |  |  |  |  |
| H  | 1.843977  | 0.646152  | -8.015242 | H  | 4.456720  | 5.216604  | -1.378970 | H  | -0.625246 | -3.129284 | -0.492943 |  |  |  |  |
| H  | 1.883219  | 0.551829  | -5.522840 | H  | 5.950931  | 4.763906  | -2.282253 | H  | 1.399052  | -4.521997 | -0.103100 |  |  |  |  |
| H  | -2.323009 | -0.508813 | -5.500069 | H  | 4.332523  | 4.451310  | -3.011410 | H  | 0.757063  | 4.613988  | -0.203283 |  |  |  |  |
| I  | -0.181762 | -0.058053 | -3.157702 | C  | 4.861318  | -4.609521 | 2.371630  | H  | -1.044357 | 2.941972  | -0.602577 |  |  |  |  |
| 58 |           |           |           |    |           |           |           |    |           |           |           |  |  |  |  |
| B2 |           |           |           |    |           |           |           |    |           |           |           |  |  |  |  |
| N  | 1.501588  | 1.187818  | -0.302391 | C  | 4.405014  | -5.317059 | 1.660197  | S  | -3.367721 | -0.261689 | -1.086389 |  |  |  |  |
| N  | 1.483372  | -1.258603 | 0.616444  | H  | 5.899947  | -4.896384 | 2.576844  | C  | -4.086497 | -0.181065 | 0.553863  |  |  |  |  |
| C  | 1.417621  | 2.407288  | -0.872555 | H  | 4.282334  | -4.588316 | 3.309369  | F  | -3.705891 | -1.207228 | 1.406632  |  |  |  |  |
| C  | 2.525458  | 3.153315  | -1.284534 | I  | -0.078774 | -0.103623 | -3.610848 | F  | -3.797478 | 0.981217  | 1.253802  |  |  |  |  |
| C  | 3.807616  | 2.589973  | -1.105824 | 30 |           |           |           |    |           |           |           |  |  |  |  |
| C  | 3.777520  | -2.684773 | 1.431091  | B3 |           |           |           |    |           |           |           |  |  |  |  |
| C  | 2.489035  | -3.240037 | 1.594471  | N  | -0.254847 | -1.246542 | -0.040021 | O  | 3.370590  | 3.848810  | 0.348371  |  |  |  |  |
| C  | 1.390257  | -2.485120 | 1.174460  | N  | -0.290509 | 1.350507  | -0.100629 | O  | 3.895783  | -3.387022 | 0.356361  |  |  |  |  |
| C  | 2.745421  | 0.639559  | -0.134123 | C  | -0.141725 | -2.594037 | -0.026902 | C  | 3.180357  | 5.284119  | 0.372889  |  |  |  |  |
| C  | 3.909306  | 1.309460  | -0.522207 | C  | -1.235697 | -3.463651 | -0.009302 | H  | 2.449182  | 5.560145  | 1.149564  |  |  |  |  |
| C  | 3.891021  | -1.400151 | 0.859506  | C  | -2.533222 | -2.905084 | -0.011213 | H  | 4.165299  | 5.702214  | 0.613378  |  |  |  |  |
| C  | 2.736159  | -0.718350 | 0.465129  | C  | -2.604254 | 2.953386  | -0.002828 | H  | 2.844269  | 5.645131  | -0.612533 |  |  |  |  |
| H  | 0.407888  | 2.791587  | -1.017504 | C  | -1.322170 | 3.542631  | -0.071443 | C  | 3.924163  | -4.835057 | 0.356818  |  |  |  |  |
| H  | 2.374529  | 4.127408  | -1.744923 | C  | -0.208406 | 2.699069  | -0.115590 | H  | 3.607280  | -5.224772 | -0.623812 |  |  |  |  |
| H  | 2.328626  | -4.222711 | 2.033574  | C  | -1.517632 | -0.704379 | -0.033822 | H  | 4.969762  | -5.102034 | 0.552093  |  |  |  |  |
| H  | 0.378063  | -2.875694 | 1.287847  | C  | -2.664940 | -1.499802 | -0.025836 | H  | 3.275042  | -5.234063 | 1.152783  |  |  |  |  |
| Ni | -0.048115 | -0.050163 | 0.093257  | C  | -2.702678 | 1.545077  | 0.011679  | 46 |           |           |           |  |  |  |  |
| N  | -1.610179 | -1.292529 | -0.228126 | C  | -1.537141 | 0.777786  | -0.041743 | B5 |           |           |           |  |  |  |  |
| N  | -1.559261 | 1.170000  | 0.643638  | H  | 0.877334  | -2.983124 | -0.031327 | Ni | -0.168265 | -0.254694 | -0.068984 |  |  |  |  |
| C  | -1.546429 | -2.527465 | -0.767435 | H  | -1.065283 | -4.538377 | 0.001910  | N  | 1.707971  | -0.978106 | -0.335099 |  |  |  |  |
| C  | -2.847706 | -0.743198 | -0.020088 | H  | -1.177311 | 4.620886  | -0.086666 | N  | 0.862329  | 1.473362  | -0.047565 |  |  |  |  |
| C  | -1.447554 | 2.413070  | 1.160491  | H  | 0.800790  | 3.110573  | -0.163905 | C  | 2.051994  | -2.271446 | -0.496384 |  |  |  |  |
| C  | -2.818200 | 0.633791  | 0.533190  | Ni | 1.207067  | 0.064574  | -0.116075 | C  | 3.363612  | -2.705484 | -0.708416 |  |  |  |  |
| C  | -2.668355 | -3.289081 | -1.106478 | I  | 3.735454  | 0.415844  | -0.219304 | C  | 4.386617  | -1.732036 | -0.756028 |  |  |  |  |
| H  | -0.542544 | -2.912554 | -0.946732 | H  | -3.685150 | 1.078984  | 0.072863  | C  | 2.511481  | 3.753813  | 0.037570  |  |  |  |  |
| C  | -4.024902 | -1.431352 | -0.328885 | H  | -3.659635 | -1.056666 | -0.035796 | C  | 1.112624  | 3.870977  | 0.198465  |  |  |  |  |
| C  | -2.533190 | 3.188519  | 1.577513  | O  | -3.772107 | 3.636700  | 0.054261  | C  | 0.345587  | 2.704174  | 0.148518  |  |  |  |  |
| H  | -0.431045 | 2.800181  | 1.242546  | O  | -3.686018 | -3.615629 | -0.000785 | C  | 2.698618  | -0.034001 | -0.381396 |  |  |  |  |
| C  | -3.961135 | 1.338939  | 0.920989  | C  | -3.709157 | 5.083309  | 0.057335  | C  | 4.038964  | -0.375698 | -0.588760 |  |  |  |  |
| C  | -3.943848 | -2.727755 | -0.879292 | H  | -3.238067 | 5.450178  | -0.868719 | C  | 3.064352  | 2.471249  | -0.158468 |  |  |  |  |
| H  | -2.533700 | -4.274975 | -1.546497 | H  | -4.752159 | 5.417826  | 0.109411  | C  | 2.221017  | 1.356646  | -0.194744 |  |  |  |  |
| C  | -3.828399 | 2.639434  | 1.450810  | H  | -3.149322 | 5.441074  | 0.936510  | H  | 1.231445  | -2.988483 | -0.448828 |  |  |  |  |
| H  | -2.358468 | 4.182889  | 1.983873  | C  | -3.588959 | -5.059748 | 0.028746  | H  | 3.565936  | -3.768519 | -0.824094 |  |  |  |  |
| H  | -4.955025 | 0.903417  | 0.830645  | H  | -4.625113 | -5.418488 | 0.035562  | H  | 0.621245  | 4.827823  | 0.362936  |  |  |  |  |
| H  | -5.004991 | -0.982714 | -0.174299 | H  | -3.063907 | -5.428351 | -0.867192 | H  | -0.737009 | 2.749213  | 0.274733  |  |  |  |  |
| H  | 4.892464  | 0.855540  | -0.407413 | H  | -3.064644 | -5.390756 | 0.939761  | S  | -1.308358 | -1.103089 | 1.698317  |  |  |  |  |
| H  | 4.878926  | -0.956135 | 0.745783  | 34 |           |           |           |    |           |           |           |  |  |  |  |
| O  | -4.978946 | 3.262698  | 1.808212  | B4 |           |           |           |    |           |           |           |  |  |  |  |
| O  | -5.123784 | -3.334190 | -1.159126 | Ni | -1.219014 | -0.121784 | -0.619866 | F  | 0.784015  | -2.612700 | 2.433959  |  |  |  |  |
| O  | 4.938364  | -3.287127 | 1.791214  | N  | 0.347314  | -1.308088 | -0.317583 | F  | 0.932656  | -0.509968 | 3.049573  |  |  |  |  |
| O  | 4.974770  | 3.180161  | -1.463064 | N  | 0.169086  | 1.279829  | -0.366885 | F  | -0.454284 | -1.864247 | 4.086647  |  |  |  |  |
| C  | -4.880828 | 4.591774  | 2.369686  | C  | 0.342267  | -2.658436 | -0.311963 | H  | 4.820702  | 0.381533  | -0.622829 |  |  |  |  |
| H  | -5.914000 | 4.893895  | 2.580484  | C  | 1.482529  | -3.437411 | -0.092195 | H  | 4.142351  | 2.368135  | -0.272730 |  |  |  |  |
| H  | -4.293357 | 4.575672  | 3.302284  | C  | 2.708902  | -2.774975 | 0.135943  | O  | 5.700998  | -1.994412 | -0.955864 |  |  |  |  |
| H  | -4.423092 | 5.284834  | 1.645096  | C  | 2.290221  | 3.071942  | 0.102702  | O  | 3.386403  | 4.787278  | 0.059377  |  |  |  |  |
| C  | -5.080489 | -4.656041 | -1.745696 | C  | 0.989916  | 3.551750  | -0.167514 | C  | 6.096308  | -3.377105 | -1.115618 |  |  |  |  |
| H  | -6.128885 | -4.936382 | -1.905104 | C  | -0.024501 | 2.616054  | -0.393018 | H  | 5.594765  | -3.824243 | -1.989230 |  |  |  |  |
| H  | -4.542438 | -4.634554 | -2.706993 | C  | 1.538101  | -0.665524 | -0.090166 | H  | 7.181131  | -3.351302 | -1.275560 |  |  |  |  |
| H  | -4.596869 | -5.367332 | -1.056233 | C  | 2.725992  | -1.362407 | 0.136603  | H  | 5.858667  | -3.952907 | -0.206505 |  |  |  |  |
|    |           |           |           | C  | 2.505346  | 1.676346  | 0.130153  | C  | 2.853378  | 6.121406  | 0.238610  |  |  |  |  |
|    |           |           |           |    |           |           |           | H  | 3.724896  | 6.786782  | 0.218235  |  |  |  |  |

H 2.163467 6.372427 -0.583090  
H 2.335288 6.202705 1.207548  
H -0.003486 -1.894283 -3.263981  
C -0.836234 -1.487485 -2.687165  
C -1.967084 -2.267311 -2.434326  
C -0.760692 -0.152949 -2.194759  
C -3.077089 -1.737436 -1.724597  
H -2.017592 -3.296198 -2.798487  
C -1.856744 0.383566 -1.446192  
H 0.024889 0.515313 -2.553110  
C -3.007080 -0.426299 -1.258272  
H -3.961083 -2.351011 -1.551161  
H -1.890338 1.445602 -1.204594  
I -4.689836 0.418941 -0.184591

46

B6

Ni -0.632627 -0.342390 0.049592  
N 0.261129 1.406813 -0.324663  
N 1.326946 -0.980944 -0.073320  
C -0.345867 2.612086 -0.325528  
C 0.324602 3.810999 -0.567353  
C 1.711495 3.759958 -0.823380  
C 4.049397 -1.578602 -0.434915  
C 3.133393 -2.588174 -0.069670  
C 1.792853 -2.231920 0.095663  
C 1.615045 1.352907 -0.533641  
C 2.357757 2.505072 -0.796575  
C 3.570440 -0.261126 -0.607889  
C 2.212903 0.002165 -0.417084  
H -1.413992 2.609322 -0.122062  
H -0.232595 4.744837 -0.549014  
H 3.434620 -3.622058 0.084684  
H 1.050637 -2.979696 0.375464  
C -2.379807 0.319923 -0.390637  
C -2.507483 0.618030 -1.759461  
C -3.427312 0.591343 0.501581  
C -3.690912 1.217802 -2.235300  
H -1.695134 0.403361 -2.458463  
C -4.604688 1.199441 0.018957  
H -3.338277 0.338018 1.558246  
C -4.739554 1.513125 -1.345902  
H -3.782951 1.453034 -3.299124  
H -5.418696 1.415360 0.716219  
H -5.656700 1.978683 -1.714695  
S -1.606646 -2.358163 0.312459  
C -1.787880 -2.897815 -1.394632  
F -2.990388 -2.570311 -1.981326  
F -0.823559 -2.402084 -2.250253  
F -1.704835 -4.271431 -1.480481  
H 3.431503 2.460170 -0.967854  
H 4.270486 0.524641 -0.883847  
O 2.491786 4.828015 -1.085238  
O 5.371408 -1.763369 -0.635253  
C 1.864367 6.135656 -1.117763  
H 1.419214 6.369387 -0.138110  
H 2.675170 6.837575 -1.345317

H 1.095651 6.169348 -1.905668  
C 5.904911 -3.101235 -0.465575  
H 6.977281 -3.011527 -0.675372  
H 5.745577 -3.448171 0.567571  
H 5.432683 -3.794798 -1.179097  
I -0.476408 0.126197 2.821160

46

B7

Ni -0.265752 -0.204014 0.183523  
N -1.667051 1.194028 -0.180342  
N -1.864414 -1.407654 0.004534  
C -1.471088 2.526447 -0.238105  
C -2.486532 3.445957 -0.514830  
C -3.789892 2.949098 -0.740381  
C -4.259546 -2.864116 -0.261394  
C -3.049534 -3.521118 0.054035  
C -1.892326 -2.746687 0.170681  
C -2.929512 0.709807 -0.393551  
C -4.006581 1.556417 -0.673539  
C -4.245079 -1.463010 -0.426300  
C -3.043265 -0.765102 -0.280403  
H -0.450688 2.860794 -0.045635  
H -2.256158 4.509091 -0.540758  
H -2.992382 -4.596428 0.209686  
H -0.937914 -3.214759 0.414924  
H -5.010370 1.166562 -0.835129  
H -5.175204 -0.946852 -0.657576  
O -4.874362 3.710629 -1.018517  
O -5.457977 -3.472242 -0.419140  
C -4.690573 5.143874 -1.107597  
H -3.974783 5.390540 -1.908201  
H -5.681472 5.547551 -1.348292  
H -4.338918 5.548037 -0.144800  
C -5.516925 -4.909893 -0.254128  
H -6.562585 -5.179130 -0.445776  
H -4.856236 -5.407410 -0.981958  
H -5.233398 -5.190784 0.772927  
H -0.205123 -0.683576 -2.363432  
C 0.670236 -0.493902 -1.738023  
C 1.419674 0.708781 -1.917610  
C 1.240580 -1.548375 -0.958959  
C 2.665157 0.866857 -1.306975  
H 1.007399 1.514558 -2.527713  
C 2.518843 -1.394787 -0.375593  
H 0.746967 -2.519473 -0.911975  
C 3.222513 -0.192241 -0.543141  
H 3.216240 1.801510 -1.422162  
H 2.945194 -2.205821 0.216169  
S 4.783917 0.038497 0.310058  
C 5.947236 -0.364424 -1.049244  
F 5.842113 0.473098 -2.125513  
F 7.221306 -0.256751 -0.572569  
F 5.801176 -1.630445 -1.543974  
I 0.951606 0.625579 2.427564

28

dmbpy

N 0.882909 -1.600425 -0.007652  
N -0.882909 1.600425 -0.007652  
C 2.145611 -2.056326 0.000989  
C 3.292445 -1.245233 0.003205  
C 3.099598 0.151244 -0.008297  
C -3.099598 -0.151244 -0.008296  
C -3.292445 1.245233 0.003205  
C -2.145611 2.056326 0.000989  
C 0.706432 -0.250760 -0.015623  
C 1.782056 0.651615 -0.018919  
C -1.782056 -0.651614 -0.018918  
C -0.706432 0.250761 -0.015622  
H 2.263360 -3.144292 0.007568  
H 4.281762 -1.699077 0.012694  
H -4.281762 1.699077 0.012695  
H -2.263360 3.144292 0.007568  
H 1.605045 1.726029 -0.025773  
H -1.605045 -1.726029 -0.025772  
O 4.095262 1.075836 -0.009623  
O -4.095261 -1.075836 -0.009621  
C -5.458239 -0.596704 0.037017  
H -6.083107 -1.498318 0.037739  
H -5.631484 -0.013848 0.956407  
H -5.683880 0.020014 -0.848351  
C 5.458239 0.596704 0.037020  
H 5.683883 -0.020014 -0.848348  
H 6.083107 1.498318 0.037742  
H 5.631482 0.013849 0.956410

69

HAT

N 1.456966 1.255378 -0.169036  
N 1.450661 -1.251609 0.580264  
C 1.377139 2.494247 -0.701605  
C 2.479804 3.249002 -1.105257  
C 3.765913 2.667616 -0.975449  
C 3.757296 -2.675839 1.383441  
C 2.470731 -3.259274 1.495551  
C 1.370798 -2.502524 1.086016  
C 2.706313 0.689625 -0.047129  
C 3.869258 1.370269 -0.446772  
C 3.862647 -1.370138 0.874858  
C 2.702788 -0.680590 0.484382  
H 0.368791 2.891959 -0.819871  
H 2.327594 4.243973 -1.518461  
H 2.317005 -4.262505 1.888081  
H 0.364080 -2.914408 1.165726  
Ni -0.097547 -0.017337 0.143922  
N -1.683292 -1.270534 -0.080357  
N -1.593328 1.214099 0.736618  
C -1.660134 -2.501587 -0.636713  
C -2.913959 -0.694566 0.145914  
C -1.459588 2.444306 1.280812  
C -2.856716 0.660324 0.711432  
C -2.798978 -3.237912 -0.967432  
H -0.669488 -2.909910 -0.836519

|      |           |           |           |      |           |           |           |      |           |           |           |
|------|-----------|-----------|-----------|------|-----------|-----------|-----------|------|-----------|-----------|-----------|
| C    | -4.111877 | -1.354988 | -0.178880 | C    | 3.524460  | -1.061513 | 1.126527  | C    | 2.512062  | -3.221578 | 1.378021  |
| C    | -2.517898 | 3.199554  | 1.790735  | C    | 2.498605  | -0.510465 | 0.350411  | C    | 1.412007  | -2.434240 | 1.028829  |
| H    | -0.443197 | 2.839104  | 1.308189  | H    | 0.587524  | 2.512840  | -2.320603 | C    | 2.766751  | 0.670075  | -0.280601 |
| C    | -3.977047 | 1.349913  | 1.205067  | H    | 2.524996  | 4.082033  | -2.370306 | C    | 3.927399  | 1.405916  | -0.602657 |
| C    | -4.064861 | -2.644078 | -0.734056 | H    | 1.861881  | -3.915211 | 2.058574  | C    | 3.927229  | -1.405815 | 0.602656  |
| H    | -2.688735 | -4.227855 | -1.405575 | H    | 0.135464  | -2.799241 | 0.664961  | C    | 2.766647  | -0.669701 | 0.280484  |
| C    | -3.818151 | 2.637353  | 1.744803  | Ni   | -0.019627 | -0.169673 | -0.932148 | H    | 0.396061  | 2.803652  | -1.185628 |
| H    | -2.323784 | 4.186018  | 2.207423  | N    | -2.020297 | -1.610305 | -0.532760 | H    | 2.353755  | 4.208375  | -1.809787 |
| H    | -4.967562 | 0.896216  | 1.191871  | N    | -1.927755 | 1.111037  | 0.005907  | H    | 2.353179  | -4.208038 | 1.809502  |
| H    | -5.077523 | -0.873797 | -0.029754 | C    | -2.115740 | -2.848603 | -1.042909 | H    | 0.395617  | -2.803101 | 1.185348  |
| H    | 4.848820  | 0.898248  | -0.380577 | C    | -3.161271 | -0.980178 | -0.151102 | Ni   | 0.000000  | 0.000342  | -0.000091 |
| H    | 4.843899  | -0.901325 | 0.810166  | C    | -1.781601 | 2.361913  | 0.472681  | N    | -1.497889 | -1.193001 | -0.503373 |
| O    | -4.944858 | 3.248405  | 2.201253  | C    | -3.023294 | 0.405126  | 0.392376  | N    | -1.497677 | 1.193977  | 0.503359  |
| O    | -5.260596 | -3.224397 | -1.025325 | C    | -3.320953 | -3.546060 | -1.195679 | C    | -1.412303 | -2.434136 | -1.029124 |
| O    | 4.919815  | -3.281751 | 1.747028  | H    | -1.176376 | -3.309437 | -1.356002 | C    | -2.766813 | -0.669413 | -0.280503 |
| O    | 4.929723  | 3.267819  | -1.344862 | C    | -4.420229 | -1.587273 | -0.276838 | C    | -1.411951 | 2.434873  | 1.028987  |
| C    | -4.809225 | 4.565428  | 2.778102  | C    | -2.688318 | 2.992591  | 1.335635  | C    | -2.766593 | 0.670348  | 0.280627  |
| H    | -5.824469 | 4.860792  | 3.071003  | H    | -0.886966 | 2.893312  | 0.138404  | C    | -2.512596 | -3.221106 | -1.378145 |
| H    | -4.153957 | 4.536308  | 3.664377  | C    | -3.981165 | 0.940003  | 1.267390  | H    | -0.396074 | -2.802933 | -1.185711 |
| H    | -4.408689 | 5.275768  | 2.036042  | C    | -4.508838 | -2.891625 | -0.805714 | C    | -3.927335 | -1.405301 | -0.602543 |
| C    | -5.243169 | -4.546533 | -1.606803 | H    | -3.318386 | -4.547666 | -1.621294 | C    | -2.512037 | 3.222199  | 1.378271  |
| H    | -6.296396 | -4.803278 | -1.776148 | C    | -3.818110 | 2.254860  | 1.749942  | H    | -0.395599 | 2.803734  | 1.185470  |
| H    | -4.696228 | -4.544292 | -2.563935 | H    | -2.505177 | 4.012900  | 1.668463  | C    | -3.927285 | 1.406388  | 0.602845  |
| H    | -4.784063 | -5.269614 | -0.912240 | H    | -4.837135 | 0.353578  | 1.599466  | C    | -3.809818 | -2.681349 | -1.162325 |
| C    | 4.851785  | 4.588728  | -1.924046 | H    | -5.333875 | -1.058538 | -0.007625 | H    | -2.353793 | -4.207689 | -1.809776 |
| H    | 4.413187  | 5.302714  | -1.207346 | H    | 4.638177  | 1.309309  | 0.214483  | C    | -3.809434 | 2.682448  | 1.162619  |
| H    | 5.888818  | 4.869109  | -2.147293 | H    | 4.476761  | -0.547970 | 1.250400  | H    | -2.353141 | 4.208609  | 1.809786  |
| H    | 4.257442  | 4.572515  | -2.852403 | O    | -4.776381 | 2.707096  | 2.598540  | H    | -4.921027 | 0.993507  | 0.432835  |
| C    | 4.840588  | -4.610618 | 2.307363  | O    | -5.756213 | -3.415296 | -0.909241 | H    | -4.921261 | -0.992280 | -0.432350 |
| H    | 4.400776  | -5.314132 | 1.581304  | O    | 4.370617  | -2.786915 | 2.484666  | H    | 4.921211  | 0.992946  | -0.432556 |
| H    | 5.877328  | -4.895376 | 2.526240  | O    | 4.880407  | 3.548231  | -0.993177 | H    | 4.921075  | -0.992858 | 0.432589  |
| H    | 4.246750  | -4.606520 | 3.236439  | C    | -4.628106 | 4.042089  | 3.133340  | O    | -4.980730 | 3.326835  | 1.470588  |
| C    | -1.028029 | -0.719571 | -7.755701 | H    | -5.497962 | 4.192419  | 3.784464  | O    | -4.981286 | -3.325652 | -1.470137 |
| C    | 0.066426  | -0.140407 | -8.426190 | H    | -3.697165 | 4.123134  | 3.718087  | O    | 4.980770  | -3.326268 | 1.470251  |
| C    | 1.101245  | 0.466031  | -7.688485 | H    | -4.629335 | 4.787255  | 2.321259  | O    | 4.981249  | 3.326302  | -1.470293 |
| C    | 1.042983  | 0.494580  | -6.277508 | C    | -5.887480 | -4.728050 | -1.502092 | C    | -4.887487 | 4.615474  | 2.088286  |
| C    | -0.052002 | -0.086604 | -5.628951 | H    | -6.963622 | -4.940443 | -1.501172 | H    | -5.921469 | 4.917708  | 2.297831  |
| C    | -1.089396 | -0.693831 | -6.344614 | H    | -5.502219 | -4.724279 | -2.534605 | H    | -4.312991 | 4.561807  | 3.029951  |
| H    | -1.833917 | -1.191293 | -8.326674 | H    | -5.351886 | -5.480161 | -0.900049 | H    | -4.413580 | 5.346609  | 1.409452  |
| H    | 0.112678  | -0.161595 | -9.517973 | C    | 4.924687  | 4.780988  | -1.748097 | C    | -4.888238 | -4.614279 | -2.087831 |
| H    | 1.953391  | 0.916707  | -8.206801 | H    | 4.155085  | 5.483062  | -1.387423 | H    | -5.922272 | -4.916399 | -2.297251 |
| H    | 1.849072  | 0.966193  | -5.706757 | H    | 5.925489  | 5.193519  | -1.570508 | H    | -4.313845 | -4.560678 | -3.029566 |
| H    | -1.941088 | -1.145870 | -5.826761 | H    | 4.780637  | 4.581108  | -2.822299 | H    | -4.414321 | -5.345463 | -1.409051 |
| I    | -0.134324 | -0.054895 | -3.113926 | C    | 4.208239  | -4.075292 | 3.118999  | C    | 4.888183  | 4.614967  | -2.087927 |
|      |           |           |           | H    | 4.020802  | -4.857385 | 2.364807  | H    | 4.414284  | 5.346120  | -1.409108 |
|      |           |           |           | H    | 5.157645  | -4.267332 | 3.633984  | H    | 5.922226  | 4.917107  | -2.297346 |
|      |           |           |           | H    | 3.381304  | -4.047152 | 3.847710  | H    | 4.313791  | 4.561417  | -3.029660 |
|      |           |           |           | I    | -0.842130 | -0.150784 | -3.804027 | C    | 4.887538  | -4.614886 | 2.087965  |
| 58   |           |           |           |      |           |           |           | H    | 4.413624  | -5.346031 | 1.409143  |
| LDTS |           |           |           |      |           |           |           | H    | 5.921512  | -4.917105 | 2.297512  |
| N    | 1.479883  | 1.133397  | -1.064374 | 57   |           |           |           | H    | 4.313033  | -4.561199 | 3.029627  |
| N    | 1.287730  | -1.145848 | 0.183797  | MECP |           |           |           |      |           |           |           |
| C    | 1.495052  | 2.292797  | -1.757532 | N    | 1.497895  | 1.193683  | -0.503382 | 29   |           |           |           |
| C    | 2.586482  | 3.165080  | -1.787372 | N    | 1.497679  | -1.193331 | 0.503262  | Ni_L |           |           |           |
| C    | 3.743782  | 2.808746  | -1.058417 | C    | 1.412230  | 2.434835  | -1.029109 | N    | 1.299502  | 1.181839  | -0.383651 |
| C    | 3.328594  | -2.305997 | 1.756840  | C    | 2.512591  | 3.221823  | -1.378191 | N    | -1.299469 | 1.180957  | 0.389648  |
| C    | 2.083377  | -2.956123 | 1.594069  | C    | 3.809776  | 2.682066  | -1.162463 | C    | 2.662396  | 1.237043  | -0.420145 |
| C    | 1.110785  | -2.334491 | 0.808930  | C    | 3.809467  | -2.681790 | 1.162318  |      |           |           |           |
| C    | 2.606081  | 0.783535  | -0.359267 |      |           |           |           |      |           |           |           |
| C    | 3.745578  | 1.596298  | -0.339879 |      |           |           |           |      |           |           |           |

|     |           |           |           |     |           |           |           |                  |           |           |           |
|-----|-----------|-----------|-----------|-----|-----------|-----------|-----------|------------------|-----------|-----------|-----------|
| C   | 3.504710  | 0.139788  | -0.223802 | I   | -2.510236 | -2.025881 | -0.280441 | C                | 0.343899  | 6.519523  | 0.573653  |
| C   | 2.917635  | -1.119649 | 0.053046  | H   | 3.572563  | 1.666310  | -0.061955 | H                | 0.986144  | 7.406248  | 0.511551  |
| C   | -2.916923 | -1.120210 | -0.052708 | H   | 1.664893  | 2.804216  | 0.335277  | H                | -0.443155 | 6.565076  | -0.196150 |
| C   | -3.504416 | 0.138287  | 0.227381  | O   | 5.527033  | 0.113971  | 0.536120  | H                | -0.106802 | 6.445305  | 1.576347  |
| C   | -2.662444 | 1.235289  | 0.426643  | O   | -0.169162 | 4.533955  | -0.165707 | I                | -3.393992 | -0.234607 | -0.818786 |
| C   | 0.732383  | -0.054228 | -0.064773 | C   | 6.574558  | -0.847231 | 0.784791  |                  |           |           |           |
| C   | 1.516267  | -1.196607 | 0.150938  | H   | 6.785272  | -1.436121 | -0.123374 | 12               |           |           |           |
| C   | -1.515451 | -1.196493 | -0.150333 | H   | 7.455213  | -0.253218 | 1.060210  | PhI              |           |           |           |
| C   | -0.732001 | -0.054445 | 0.068405  | H   | 6.299068  | -1.519261 | 1.614390  | C                | -0.592520 | 0.000000  | 0.000039  |
| H   | 3.085650  | 2.213911  | -0.660062 | C   | -1.262138 | 5.409622  | -0.507654 | C                | -1.275503 | -1.226462 | 0.000121  |
| H   | 4.581520  | 0.272537  | -0.315320 | H   | -2.225456 | 4.977836  | -0.187541 | C                | -2.683569 | -1.216240 | 0.000305  |
| H   | -4.581283 | 0.270395  | 0.319252  | H   | -1.071262 | 6.344298  | 0.035168  | C                | -3.389029 | 0.000001  | 0.000407  |
| H   | -3.086148 | 2.211357  | 0.669152  | H   | -1.282207 | 5.601983  | -1.593646 | C                | -2.683569 | 1.216240  | 0.000304  |
| Ni  | -0.001171 | 2.542699  | -0.003172 |     |           |           |           | C                | -1.275501 | 1.226462  | 0.000121  |
| H   | 1.046912  | -2.140632 | 0.429627  | 46  |           |           |           | H                | -0.731785 | -2.171768 | 0.000040  |
| H   | -1.045769 | -2.139677 | -0.431343 | OA2 |           |           |           | H                | -3.221927 | -2.166789 | 0.000370  |
| O   | -3.608298 | -2.279352 | -0.263379 | Ni  | -0.716482 | -0.485582 | 0.350984  | H                | -4.481100 | 0.000000  | 0.000562  |
| O   | 3.609409  | -2.279119 | 0.260394  | N   | 1.279104  | -0.615439 | 0.028778  | H                | -3.221924 | 2.166791  | 0.000369  |
| C   | 5.047807  | -2.220584 | 0.185261  | N   | -0.250198 | 1.496781  | 0.313294  | H                | -0.731785 | 2.171768  | 0.000038  |
| H   | 5.451675  | -1.524510 | 0.939974  | C   | 1.975002  | -1.751608 | -0.156384 | I                | 1.580880  | 0.000000  | -0.000173 |
| H   | 5.393844  | -3.241038 | 0.393644  | C   | 3.337602  | -1.782934 | -0.467277 |                  |           |           |           |
| H   | 5.375034  | -1.911098 | -0.821738 | C   | 4.016102  | -0.552717 | -0.598194 | 12               |           |           |           |
| C   | -5.046712 | -2.221389 | -0.188394 | C   | 0.679177  | 4.153857  | 0.344585  | PhI <sup>-</sup> |           |           |           |
| H   | -5.450558 | -1.522876 | -0.940871 | C   | -0.686202 | 3.866902  | 0.562465  | C                | 1.384064  | 0.000251  | 0.216528  |
| H   | -5.392467 | -3.241219 | -0.400284 | C   | -1.089383 | 2.528808  | 0.535192  | C                | 2.024717  | -1.230416 | 0.130259  |
| H   | -5.374241 | -1.915331 | 0.819560  | C   | 1.932845  | 0.578954  | -0.094912 | C                | 3.428810  | -1.222874 | -0.052359 |
|     |           |           |           | C   | 3.293664  | 0.644357  | -0.407106 | C                | 4.122743  | -0.000250 | -0.143015 |
| 41  |           |           |           | C   | 1.568473  | 3.081158  | 0.124258  | C                | 3.429254  | 1.222628  | -0.052407 |
| OA1 |           |           |           | C   | 1.077603  | 1.772472  | 0.118285  | C                | 2.025163  | 1.230683  | 0.130212  |
| Ni  | -0.215035 | -1.291336 | -0.929817 | H   | 1.408979  | -2.674889 | -0.045488 | H                | 1.478241  | -2.175211 | 0.196707  |
| N   | 1.705571  | -1.141744 | -0.625491 | H   | 3.835129  | -2.741263 | -0.600416 | H                | 3.971395  | -2.170105 | -0.126413 |
| N   | -0.050039 | 0.602225  | -1.655687 | H   | -1.423337 | 4.645348  | 0.748552  | H                | 5.205919  | -0.000450 | -0.288247 |
| C   | 2.680626  | -2.054752 | -0.396603 | H   | -2.135003 | 2.262530  | 0.691026  | H                | 3.972177  | 2.169661  | -0.126525 |
| C   | 3.981813  | -1.727066 | 0.000917  | C   | -1.312486 | -0.876242 | -1.644824 | H                | 1.479031  | 2.175680  | 0.196634  |
| C   | 4.308899  | -0.358704 | 0.153189  | C   | -1.080660 | -2.269567 | -1.731427 | I                | -2.162175 | 0.000006  | -0.023160 |
| C   | -0.177237 | 3.277149  | -0.700346 | C   | -0.673987 | 0.026907  | -2.529470 |                  |           |           |           |
| C   | -1.182893 | 2.764341  | -1.551229 | C   | -0.077931 | -2.733542 | -2.602392 | 11               |           |           |           |
| C   | -1.068822 | 1.438721  | -1.984380 | H   | -1.640825 | -2.962782 | -1.105771 | Ph <sup>-</sup>  |           |           |           |
| C   | 2.042250  | 0.193351  | -0.519823 | C   | 0.324501  | -0.460017 | -3.383846 | C                | 1.223213  | 0.637579  | 0.000005  |
| C   | 3.323494  | 0.607363  | -0.126421 | H   | -0.912860 | 1.089072  | -2.498113 | C                | -0.000005 | 1.334146  | -0.000002 |
| C   | 0.899060  | 2.439152  | -0.349474 | C   | 0.633470  | -1.836294 | -3.417588 | C                | -1.223202 | 0.637604  | -0.000002 |
| C   | 0.948026  | 1.130558  | -0.850601 | H   | 0.140042  | -3.803742 | -2.637803 | C                | -1.235625 | -0.779041 | 0.000003  |
| H   | 2.386114  | -3.099244 | -0.510912 | H   | 0.863563  | 0.240876  | -4.026251 | C                | -0.000009 | -1.407303 | 0.000001  |
| H   | 4.698852  | -2.523351 | 0.192582  | H   | 1.409962  | -2.205373 | -4.090963 | C                | 1.235632  | -0.779027 | -0.000006 |
| H   | -2.034571 | 3.362104  | -1.872409 | S   | -1.324912 | -1.992762 | 2.012561  | H                | 2.170396  | 1.183876  | 0.000012  |
| H   | -1.836212 | 1.010402  | -2.633915 | C   | 0.016762  | -1.782546 | 3.157468  | H                | 0.000026  | 2.426463  | -0.000003 |
| C   | -1.978540 | -0.501122 | 1.296212  | F   | 1.209048  | -2.401988 | 2.792849  | H                | -2.170413 | 1.183851  | 0.000000  |
| C   | -2.421305 | 0.815987  | 1.135589  | F   | 0.381090  | -0.462446 | 3.402567  | H                | -2.180265 | -1.328946 | 0.000002  |
| C   | -1.201012 | -0.909423 | 2.388485  | F   | -0.269457 | -2.305629 | 4.413096  | H                | 2.180238  | -1.328991 | -0.000004 |
| C   | -2.063283 | 1.765257  | 2.114307  | H   | 3.809096  | 1.597788  | -0.510259 |                  |           |           |           |
| H   | -3.006876 | 1.109822  | 0.265147  | H   | 2.625210  | 3.292109  | -0.030689 | 16               |           |           |           |
| C   | -0.847253 | 0.055108  | 3.352142  | O   | 5.328785  | -0.416804 | -0.902890 | PhSCF3           |           |           |           |
| H   | -0.864191 | -1.942160 | 2.483315  | O   | 1.221907  | 5.393828  | 0.330805  | C                | 0.735576  | -0.036151 | 0.546681  |
| C   | -1.274806 | 1.389668  | 3.215854  | C   | 6.104992  | -1.623480 | -1.095142 | C                | 1.399626  | -1.241229 | 0.241626  |
| H   | -2.398251 | 2.799283  | 2.004723  | H   | 5.700176  | -2.211396 | -1.934690 | C                | 2.703809  | -1.196521 | -0.278777 |
| H   | -0.228179 | -0.241766 | 4.202400  | H   | 7.120353  | -1.280752 | -1.328180 | C                | 3.339095  | 0.040359  | -0.489393 |
| H   | -0.991596 | 2.133321  | 3.964021  | H   | 6.110350  | -2.228470 | -0.174041 | C                | 2.672381  | 1.238862  | -0.177763 |

|              |           |           |              |           |           |             |           |           |
|--------------|-----------|-----------|--------------|-----------|-----------|-------------|-----------|-----------|
| C 1.369029   | 1.206710  | 0.345794  | H 5.929724   | -4.584558 | -0.405741 | F -0.843409 | -0.805760 | -0.986511 |
| H 0.902718   | -2.198749 | 0.404648  | H 4.312610   | -4.917281 | 0.319538  | F -0.843347 | -0.452014 | 1.190756  |
| H 3.220925   | -2.128057 | -0.517969 |              |           |           |             |           |           |
| H 4.353525   | 0.070061  | -0.892563 | 46           |           |           |             |           |           |
| H 3.165388   | 2.199892  | -0.338133 | RE2          |           |           |             |           |           |
| H 0.849341   | 2.134050  | 0.591241  | Ni -0.716217 | 0.075262  | -0.428408 |             |           |           |
| S -0.923486  | -0.091484 | 1.255297  | N 0.820346   | -1.239790 | -0.292811 |             |           |           |
| C -1.913625  | 0.016643  | -0.283884 | N 0.866286   | 1.381309  | -0.386416 |             |           |           |
| F -1.734453  | 1.185075  | -0.966820 | C 0.685876   | -2.574520 | -0.187499 |             |           |           |
| F -1.650932  | -0.986689 | -1.170336 | C 1.739965   | -3.429616 | 0.144590  |             |           |           |
| F -3.231445  | -0.063440 | 0.052971  | C 3.009409   | -2.859675 | 0.384658  |             |           |           |
|              |           |           | C 3.219957   | 2.917370  | -0.505710 |             |           |           |
| 45           |           |           | C 1.956813   | 3.520595  | -0.691913 |             |           |           |
| RE1          |           |           | C 0.822582   | 2.707671  | -0.621681 |             |           |           |
| Ni -0.713556 | -0.063909 | -0.207256 | C 2.049411   | -0.684292 | -0.076126 |             |           |           |
| N 0.962536   | -1.126860 | -0.409521 | C 3.158975   | -1.460975 | 0.265718  |             |           |           |
| N 0.598691   | 1.421176  | 0.116951  | C 3.278260   | 1.524972  | -0.278433 |             |           |           |
| C 1.073849   | -2.462981 | -0.582471 | C 2.091934   | 0.789695  | -0.236878 |             |           |           |
| C 2.286551   | -3.157047 | -0.573198 | H -0.314181  | -2.963361 | -0.375999 |             |           |           |
| C 3.473270   | -2.421977 | -0.353791 | H 1.559869   | -4.500350 | 0.211566  |             |           |           |
| C 2.675494   | 3.327489  | 0.295042  | H 1.841570   | 4.584285  | -0.889487 |             |           |           |
| C 1.323156   | 3.721291  | 0.413045  | H -0.169720  | 3.135535  | -0.758222 |             |           |           |
| C 0.339392   | 2.734381  | 0.311405  | C -1.515997  | -0.411192 | 1.352579  |             |           |           |
| C 2.119532   | -0.413898 | -0.192103 | C -0.636401  | -0.109368 | 2.413143  |             |           |           |
| C 3.375728   | -1.030245 | -0.156803 | C -2.289490  | -1.592452 | 1.368710  |             |           |           |
| C 2.965078   | 1.963639  | 0.092302  | C -0.459966  | -1.051579 | 3.441690  |             |           |           |
| C 1.915964   | 1.039431  | 0.014131  | H -0.051569  | 0.807897  | 2.411790  |             |           |           |
| H 0.132352   | -2.994195 | -0.730652 | C -2.098546  | -2.521381 | 2.404966  |             |           |           |
| H 2.289332   | -4.234381 | -0.729574 | H -2.997738  | -1.796406 | 0.566019  |             |           |           |
| H 1.030195   | 4.756915  | 0.574388  | C -1.183001  | -2.258573 | 3.441651  |             |           |           |
| H -0.715752  | 3.000985  | 0.387495  | H 0.254579   | -0.836158 | 4.240179  |             |           |           |
| C -2.274928  | -1.190776 | 0.069960  | H -2.677096  | -3.448401 | 2.400634  |             |           |           |
| C -2.273014  | -0.759718 | 1.446648  | H -1.044373  | -2.981247 | 4.248624  |             |           |           |
| C -2.372353  | -2.593902 | -0.225128 | S -2.554612  | 1.185942  | 0.219387  |             |           |           |
| C -2.156296  | -1.734135 | 2.463452  | C -2.334424  | 2.480361  | 1.501948  |             |           |           |
| H -2.448603  | 0.280375  | 1.720145  | F -2.820106  | 2.118416  | 2.727681  |             |           |           |
| C -2.273785  | -3.522761 | 0.809072  | F -1.050039  | 2.895614  | 1.703308  |             |           |           |
| H -2.468426  | -2.922692 | -1.262334 | F -3.048088  | 3.584589  | 1.112897  |             |           |           |
| C -2.133907  | -3.103685 | 2.159249  | H 4.131523   | -1.007505 | 0.450637  |             |           |           |
| H -2.113429  | -1.404746 | 3.505560  | H 4.247128   | 1.040632  | -0.167131 |             |           |           |
| H -2.303715  | -4.589933 | 0.571673  | O 4.118077   | -3.552719 | 0.729898  |             |           |           |
| H -2.059948  | -3.845484 | 2.957614  | O 4.403760   | 3.567138  | -0.542406 |             |           |           |
| S -2.599653  | 0.041900  | -1.300041 | C 4.001336   | -4.989987 | 0.870310  |             |           |           |
| C -3.939942  | 1.164209  | -0.593408 | H 3.692447   | -5.445292 | -0.084071 |             |           |           |
| F -4.970821  | 0.478235  | -0.018288 | H 5.004086   | -5.335274 | 1.149377  |             |           |           |
| F -3.489427  | 2.053004  | 0.344131  | H 3.278067   | -5.239552 | 1.663097  |             |           |           |
| F -4.469984  | 1.907090  | -1.615757 | C 4.389504   | 4.990214  | -0.817540 |             |           |           |
| H 4.282145   | -0.457877 | 0.035495  | H 5.442646   | 5.295028  | -0.810831 |             |           |           |
| H 4.003618   | 1.653140  | -0.014718 | H 3.942028   | 5.184042  | -1.805352 |             |           |           |
| O 3.739050   | 4.168560  | 0.354553  | H 3.831812   | 5.526865  | -0.033719 |             |           |           |
| O 4.723263   | -2.951938 | -0.305779 | I -2.001461  | -1.160760 | -2.558817 |             |           |           |
| C 3.471677   | 5.579175  | 0.528711  |              |           |           |             |           |           |
| H 2.954542   | 5.759198  | 1.485186  | 5            |           |           |             |           |           |
| H 4.455895   | 6.063220  | 0.535329  | SCF3-        |           |           |             |           |           |
| H 2.865432   | 5.963076  | -0.307987 | S 1.508163   | 0.000126  | -0.000028 |             |           |           |
| C 4.854110   | -4.380931 | -0.477039 | C -0.225828  | 0.000197  | -0.000127 |             |           |           |
| H 4.475603   | -4.690212 | -1.465039 | F -0.843871  | 1.257419  | -0.204111 |             |           |           |

|                                  |                                 |                                 |
|----------------------------------|---------------------------------|---------------------------------|
| Substrate: Bromobenzene          | C -1.552381 1.400312 0.021117   | C -1.955098 0.157958 -1.454458  |
|                                  | C -2.300268 2.578911 -0.019636  | C -1.299576 4.142283 -0.171138  |
| 41                               | C -3.541476 -0.170771 0.029326  | H 0.375242 3.212883 0.816710    |
| A2_Br                            | C -2.162595 0.055765 0.041315   | C -2.662271 2.579357 -1.423305  |
| Ni -0.054831 -0.958569 -0.562188 | H 1.525942 2.600366 0.045639    | C -2.011431 -2.450027 -2.398305 |
| N -2.004792 -1.052861 -0.254409  | H 0.345026 4.757182 -0.023142   | H 0.026400 -2.469910 -1.702452  |
| N -0.363415 0.976726 -0.305512   | H -3.389086 -3.596794 0.084470  | C -3.140365 -0.341514 -2.020555 |
| C -2.791644 -2.152642 -0.240406  | H -0.974874 -3.016188 0.110199  | C -2.428152 3.893498 -0.989990  |
| C -4.175812 -2.124321 -0.040311  | C 2.426124 0.375591 0.116441    | H -1.062128 5.133857 0.211510   |
| C -4.793189 -0.871096 0.162517   | C 3.046466 0.731290 1.333791    | C -3.182154 -1.659400 -2.498683 |
| C -1.113071 3.674885 0.075316    | C 3.089989 0.670285 -1.094329   | H -1.960852 -3.469153 -2.777930 |
| C 0.234768 3.328548 -0.161658    | C 4.293984 1.388181 1.340424    | H -4.035579 0.277180 -2.076870  |
| C 0.546646 1.977168 -0.342514    | H 2.557536 0.501849 2.284858    | H -3.497421 2.377358 -2.094043  |
| C -2.610236 0.165628 -0.052133   | C 4.337886 1.326549 -1.089260   | H 5.661101 0.224997 0.201809    |
| C -3.986809 0.286764 0.155686    | H 2.635358 0.392461 -2.049555   | H 5.293930 -1.837131 -0.497441  |
| C -2.076493 2.644702 0.118128    | C 4.944017 1.690585 0.128455    | O -4.365625 -2.080045 -3.030734 |
| C -1.676055 1.319777 -0.075585   | H 4.758285 1.658846 2.293748    | O -3.307903 4.844664 -1.417359  |
| H -2.275593 -3.100641 -0.397096  | H 4.836774 1.548620 -2.037658   | O 4.970432 -4.375719 -0.306078  |
| H -4.737895 -3.056411 -0.045462  | H 5.912479 2.197637 0.133065    | O 6.259608 2.701239 -0.142324   |
| H 1.029149 4.071698 -0.204179    | H -3.388017 2.553134 -0.039637  | C -4.436910 -3.436198 -3.516861 |
| H 1.576171 1.668215 -0.522750    | H -4.254500 0.651219 0.009155   | H -5.463478 -3.561722 -3.884140 |
| H 3.332239 -2.160701 2.077636    | O -2.436260 4.922016 -0.082651  | H -3.721103 -3.594761 -4.340959 |
| C 2.640696 -2.287737 1.244032    | O -5.368724 -1.645414 0.031227  | H -4.237002 -4.152522 -2.702438 |
| C 1.695419 -3.375255 1.247539    | C -1.793746 6.219949 -0.117309  | C -3.067958 6.207969 -1.012616  |
| C 2.662467 -1.444408 0.154956    | H -2.613594 6.947822 -0.142450  | H -3.871140 6.795721 -1.474905  |
| C 0.840864 -3.573866 0.175845    | H -1.180628 6.369198 0.785614   | H -3.114704 6.304624 0.084931   |
| C 1.768074 -1.529167 -0.971398   | H -1.171078 6.315001 -1.021289  | H -2.087451 6.557372 -1.377860  |
| C 0.817314 -2.663510 -0.950675   | C -5.899084 -2.993273 0.046829  | C 6.459769 4.118173 -0.323086   |
| H 0.173134 -4.440534 0.165769    | H -6.989072 -2.874040 0.037259  | H 5.846328 4.693186 0.390905    |
| H 2.106802 -1.109104 -1.926845   | H -5.568242 -3.546205 -0.846926 | H 7.525690 4.290228 -0.126066   |
| H 0.437668 -3.055452 -1.905705   | H -5.581297 -3.520652 0.960478  | H 6.214371 4.420184 -1.355083   |
| H 1.683548 -4.054966 2.103630    | Br 1.697485 -2.507384 0.193032  | C 4.658113 -5.780820 -0.204280  |
| H -4.453533 1.257872 0.314584    |                                 | H 3.933854 -6.076085 -0.981777  |
| H -3.118841 2.901640 0.302386    | 69                              | H 5.610446 -6.303806 -0.359008  |
| O -6.120915 -0.678465 0.368100   | ADTS_Br                         | H 4.255447 -6.020475 0.793967   |
| O -1.573577 4.936592 0.268977    | N 2.404336 1.055388 -0.469889   | H -0.215270 -1.671071 1.687202  |
| C -0.611240 6.015560 0.241824    | N 1.943529 -1.494921 0.121314   | C -0.390148 -0.628068 1.933323  |
| H -0.116183 6.067771 -0.741490   | C 2.618559 2.371439 -0.704249   | C -1.689703 -0.180164 2.218519  |
| H -1.193122 6.928085 0.420433    | C 3.863635 3.000851 -0.646180   | C 0.702666 0.257700 2.203228    |
| H 0.140677 5.882674 1.036756     | C 4.992350 2.217066 -0.293661   | C -1.967891 1.090425 2.735745   |
| C -6.972669 -1.846562 0.392656   | C 3.947561 -3.487213 -0.148858  | C 0.443718 1.510138 2.822142    |
| H -6.683531 -2.518550 1.217354   | C 2.597165 -3.843203 0.098626   | H 1.718156 -0.139075 2.226180   |
| H -7.986930 -1.462318 0.556428   | C 1.659708 -2.812194 0.203908   | C -0.875429 1.929485 3.051920   |
| H -6.921269 -2.383583 -0.568510  | C 3.522613 0.282046 -0.204695   | H -1.073534 2.914870 3.481981   |
| Br 4.048034 0.006167 0.103252    | C 4.808306 0.844065 -0.077679   | H -2.993004 1.416495 2.914984   |
|                                  | C 4.269724 -2.126675 -0.261925  | H 1.280572 2.161093 3.086967    |
| 41                               | C 3.263216 -1.153960 -0.101035  | Br -3.201757 -1.409257 1.834932 |
| A3_Br                            | H 1.736295 2.953929 -0.968654   |                                 |
| Ni 0.680592 -0.344917 0.100219   | H 3.940695 4.062539 -0.874623   | 69                              |
| N -0.174191 1.406806 0.043301    | H 2.276870 -4.876890 0.217245   | B1T_Br                          |
| N -1.251852 -0.966979 0.072514   | H 0.612761 -3.066022 0.381877   | N 1.492900 1.227216 -0.204098   |
| C 0.439790 2.615798 0.026779     | Ni 0.608226 0.165237 -0.074430  | N 1.494560 -1.255558 0.616831   |
| C -0.234825 3.836659 -0.012651   | N -0.708148 1.779962 -0.205626  | C 1.406710 2.467735 -0.727987   |
| C -1.644779 3.826564 -0.039285   | N -0.828040 -0.625120 -1.301203 | C 2.498336 3.218127 -1.172968   |
| C -4.024231 -1.495980 0.044778   | C -0.489977 3.056329 0.172418   | C 3.787430 2.623989 -1.086408   |
| C -3.088180 -2.551194 0.072657   | C -1.797940 1.547060 -1.014735  | C 3.820605 -2.724463 1.272828   |
| C -1.728109 -2.229380 0.086448   | C -0.887859 -1.883773 -1.790609 | C 2.528204 -3.279734 1.483712   |

|    |           |           |           |       |           |           |           |       |           |           |           |
|----|-----------|-----------|-----------|-------|-----------|-----------|-----------|-------|-----------|-----------|-----------|
| C  | 1.421646  | -2.495607 | 1.144753  | H     | -0.408349 | -0.315187 | -9.060093 | C     | 2.253704  | -5.295867 | 3.553099  |
| C  | 2.749785  | 0.643153  | -0.123465 | H     | 1.636576  | 0.629876  | -7.963008 | H     | 3.013339  | -5.798774 | 4.164463  |
| C  | 3.904407  | 1.330541  | -0.562751 | H     | 1.774797  | 0.773529  | -5.477451 | H     | 1.417195  | -4.961919 | 4.189177  |
| C  | 3.925449  | -1.432508 | 0.742278  | H     | -2.183269 | -0.976730 | -5.161100 | H     | 1.882885  | -5.980911 | 2.772864  |
| C  | 2.755464  | -0.708203 | 0.417508  | Br    | -0.089458 | 0.009819  | -3.204722 | C     | 6.605395  | 2.550511  | -1.102754 |
| H  | 0.397393  | 2.877359  | -0.796927 |       |           |           |           | H     | 6.183878  | 3.478122  | -0.681620 |
| H  | 2.340191  | 4.217058  | -1.574562 | 58    |           |           |           | H     | 7.684807  | 2.506935  | -0.911165 |
| H  | 2.378191  | -4.275354 | 1.896238  | B2_Br |           |           |           | H     | 6.410588  | 2.505305  | -2.186779 |
| H  | 0.410995  | -2.877942 | 1.302293  | N     | -1.961897 | -0.596063 | -0.600551 | Br    | 0.058485  | -0.095110 | -3.351571 |
| Ni | -0.038500 | -0.003446 | 0.232168  | N     | -0.884703 | 1.581951  | 0.369588  |       |           |           |           |
| N  | -1.583871 | -1.226098 | -0.179228 | C     | -2.454390 | -1.687891 | -1.219366 | 30    |           |           |           |
| N  | -1.559029 | 1.244115  | 0.676558  | C     | -3.805662 | -2.047729 | -1.210716 | B3_Br |           |           |           |
| C  | -1.512670 | -2.455818 | -0.729537 | C     | -4.711834 | -1.201226 | -0.531074 | N     | -0.488036 | -1.305400 | 0.007864  |
| C  | -2.836132 | -0.638413 | -0.065974 | C     | -2.236509 | 3.415841  | 2.048757  | N     | -0.038975 | 1.249773  | 0.005224  |
| C  | -1.469758 | 2.474879  | 1.223219  | C     | -0.866201 | 3.589986  | 1.741400  | C     | -0.627893 | -2.650618 | 0.008912  |
| C  | -2.825638 | 0.703538  | 0.498676  | C     | -0.253291 | 2.649172  | 0.910823  | C     | -1.863892 | -3.303111 | 0.006897  |
| C  | -2.615274 | -3.192324 | -1.170564 | C     | -2.839711 | 0.227693  | 0.052243  | C     | -3.035547 | -2.513879 | 0.003528  |
| H  | -0.506363 | -2.867312 | -0.825033 | C     | -4.214530 | -0.045551 | 0.100259  | C     | -2.020136 | 3.255323  | 0.000201  |
| C  | -4.001495 | -1.311262 | -0.498473 | C     | -2.910276 | 2.307883  | 1.503157  | C     | -0.649377 | 3.597256  | 0.001678  |
| C  | -2.565801 | 3.256452  | 1.600275  | C     | -2.217224 | 1.418669  | 0.669485  | C     | 0.289306  | 2.561640  | 0.004206  |
| H  | -0.454527 | 2.851706  | 1.363067  | H     | -1.720022 | -2.290682 | -1.754677 | C     | -1.629023 | -0.539589 | 0.004822  |
| C  | -3.985443 | 1.425343  | 0.861638  | H     | -4.127585 | -2.948768 | -1.729820 | C     | -2.904184 | -1.109038 | 0.002648  |
| C  | -3.899861 | -2.594490 | -1.050099 | H     | -0.284685 | 4.423604  | 2.131604  | C     | -2.376806 | 1.890163  | 0.001185  |
| H  | -2.468260 | -4.183451 | -1.594888 | H     | 0.804005  | 2.747331  | 0.660408  | C     | -1.372677 | 0.919495  | 0.003700  |
| C  | -3.864392 | 2.708392  | 1.410508  | Ni    | -0.002773 | 0.005242  | -0.626094 | H     | 0.300896  | -3.222939 | 0.011455  |
| H  | -2.403343 | 4.244800  | 2.025463  | H     | 1.727130  | 2.285215  | -1.766848 | H     | -1.895936 | -4.390972 | 0.007999  |
| H  | -4.976881 | 0.989013  | 0.741357  | C     | 2.456176  | 1.685938  | -1.220539 | H     | -0.308288 | 4.630741  | 0.001000  |
| H  | -4.979913 | -0.835727 | -0.432036 | C     | 3.809919  | 2.036462  | -1.218000 | H     | 1.357804  | 2.782415  | 0.005467  |
| H  | 4.886352  | 0.859489  | -0.522307 | C     | 4.709626  | 1.196226  | -0.522702 | Ni    | 1.203323  | -0.288244 | 0.008769  |
| H  | 4.912998  | -0.992043 | 0.606803  | H     | 4.138290  | 2.925355  | -1.753712 | H     | -3.430459 | 1.614841  | 0.000043  |
| O  | -5.027135 | 3.343077  | 1.742610  | C     | 4.203389  | 0.056642  | 0.130756  | H     | -3.799833 | -0.489934 | 0.000106  |
| O  | -5.065918 | -3.181649 | -1.452430 | C     | 2.826893  | -0.207500 | 0.086579  | O     | -3.043635 | 4.142710  | -0.002086 |
| O  | 4.992539  | -3.361115 | 1.567197  | N     | 1.955414  | 0.609340  | -0.582375 | O     | -4.300524 | -2.998797 | 0.000994  |
| O  | 4.943771  | 3.225234  | -1.495807 | C     | 2.196310  | -1.383449 | 0.725924  | C     | -2.713982 | 5.551671  | -0.004049 |
| C  | -4.932340 | 4.661618  | 2.318864  | N     | 0.864648  | -1.545948 | 0.426110  | H     | -2.138302 | 5.811722  | -0.907107 |
| H  | -5.967495 | 4.971062  | 2.512014  | C     | 2.882660  | -2.259671 | 1.578307  | H     | -3.677759 | 6.075161  | -0.006491 |
| H  | -4.365141 | 4.636994  | 3.264401  | C     | 0.225990  | -2.599219 | 0.984364  | H     | -2.141143 | 5.814898  | 0.899897  |
| H  | -4.455222 | 5.363159  | 1.614034  | C     | 2.201389  | -3.353480 | 2.143598  | C     | -4.472135 | -4.435692 | 0.000470  |
| C  | -4.988271 | -4.497258 | -2.036948 | H     | -0.830784 | -2.696811 | 0.730995  | H     | -5.557045 | -4.596899 | -0.001950 |
| H  | -6.023845 | -4.771478 | -2.276046 | C     | 0.831500  | -3.527147 | 1.835188  | H     | -4.020515 | -4.877480 | -0.902376 |
| H  | -4.382140 | -4.482768 | -2.958455 | H     | 0.244752  | -4.350723 | 2.238610  | H     | -4.024610 | -4.877702 | 0.905239  |
| H  | -4.563867 | -5.220349 | -1.320301 | H     | -3.961423 | 2.153809  | 1.744715  | Br    | 3.530313  | -0.635832 | 0.011308  |
| C  | 4.847561  | 4.543735  | -2.070949 | H     | -4.908869 | 0.626760  | 0.602018  |       |           |           |           |
| H  | 4.428834  | 5.259740  | -1.343937 | H     | 3.934005  | -2.106615 | 1.819421  | 46    |           |           |           |
| H  | 5.877328  | 4.827254  | -2.323832 | H     | 4.892466  | -0.610823 | 0.646083  | B5_Br |           |           |           |
| H  | 4.227630  | 4.529789  | -2.983263 | O     | -2.968190 | 4.239425  | 2.847525  | Ni    | -0.509004 | -0.205457 | -0.070655 |
| C  | 4.913999  | -4.684550 | 2.134730  | O     | -6.052129 | -1.407794 | -0.440934 | N     | 1.335468  | -0.997836 | -0.354976 |
| H  | 4.425038  | -5.382126 | 1.434074  | O     | 6.051345  | 1.393762  | -0.436981 | N     | 0.586785  | 1.484918  | -0.052960 |
| H  | 5.953838  | -4.992143 | 2.304349  | O     | 2.927116  | -4.164294 | 2.960291  | C     | 1.629331  | -2.302205 | -0.527391 |
| H  | 4.365474  | -4.669162 | 3.091399  | C     | -2.301264 | 5.385774  | 3.418697  | C     | 2.923242  | -2.785328 | -0.741819 |
| C  | -1.420805 | -0.702773 | -7.179218 | H     | -1.929801 | 6.055533  | 2.625516  | C     | 3.983574  | -1.852380 | -0.781032 |
| C  | -0.349244 | -0.252803 | -7.971394 | H     | -3.065222 | 5.898901  | 4.016045  | C     | 2.328724  | 3.694985  | 0.061601  |
| C  | 0.798767  | 0.278076  | -7.356275 | H     | -1.466100 | 5.068719  | 4.065232  | C     | 0.935063  | 3.868353  | 0.215657  |
| C  | 0.883264  | 0.362179  | -5.953276 | C     | -6.598019 | -2.578303 | -1.089084 | C     | 0.121024  | 2.734709  | 0.151278  |
| C  | -0.197077 | -0.093577 | -5.183915 | H     | -7.677870 | -2.538691 | -0.898997 | C     | 2.362454  | -0.092793 | -0.392825 |
| C  | -1.351897 | -0.626625 | -5.775010 | H     | -6.402660 | -2.548412 | -2.173568 | C     | 3.688555  | -0.485114 | -0.602193 |
| H  | -2.317097 | -1.116665 | -7.647334 | H     | -6.171279 | -3.496729 | -0.653344 | C     | 2.828852  | 2.392551  | -0.144332 |

|       |           |           |           |       |           |           |           |         |           |           |           |
|-------|-----------|-----------|-----------|-------|-----------|-----------|-----------|---------|-----------|-----------|-----------|
| C     | 1.940324  | 1.314198  | -0.195584 | C     | -3.790933 | 1.187805  | -1.942921 | C       | -3.975807 | 1.372709  | 0.993095  |
| H     | 0.782143  | -2.987715 | -0.486688 | H     | -1.821783 | 0.326851  | -2.223831 | C       | -3.997854 | -2.708136 | -0.769739 |
| H     | 3.083752  | -3.854521 | -0.865674 | C     | -4.609162 | 1.255862  | 0.346998  | H       | -2.601745 | -4.328968 | -1.303099 |
| H     | 0.482769  | 4.843294  | 0.384911  | H     | -3.283105 | 0.427696  | 1.858724  | C       | -3.828985 | 2.676780  | 1.488797  |
| H     | -0.959125 | 2.824763  | 0.273664  | C     | -4.796385 | 1.528913  | -1.020613 | H       | -2.341251 | 4.230355  | 1.970882  |
| S     | -1.660685 | -1.054070 | 1.687876  | H     | -3.924610 | 1.390326  | -3.009103 | H       | -4.970469 | 0.930389  | 0.945560  |
| C     | -0.349572 | -1.540589 | 2.791291  | H     | -5.389448 | 1.508706  | 1.070136  | H       | -5.035275 | -0.911925 | -0.183727 |
| F     | 0.373886  | -2.657000 | 2.384627  | H     | -5.720905 | 1.998022  | -1.365855 | H       | 4.874998  | 0.779246  | -0.466844 |
| F     | 0.617376  | -0.569664 | 3.021986  | S     | -1.630304 | -2.354778 | 0.544319  | H       | 4.880903  | -0.997932 | 0.765158  |
| F     | -0.815381 | -1.875827 | 4.058135  | C     | -1.800684 | -2.898263 | -1.161033 | O       | -4.972331 | 3.319453  | 1.860162  |
| H     | 4.499353  | 0.241380  | -0.628148 | F     | -3.014196 | -2.603148 | -1.745374 | O       | -5.182905 | -3.298652 | -1.096196 |
| H     | 3.901999  | 2.246530  | -0.256195 | F     | -0.852891 | -2.376930 | -2.020877 | O       | 4.951583  | -3.341964 | 1.791223  |
| O     | 5.286929  | -2.163380 | -0.983382 | F     | -1.681146 | -4.269842 | -1.251270 | O       | 4.951533  | 3.113628  | -1.517163 |
| O     | 3.245254  | 4.691024  | 0.098720  | H     | 3.396335  | 2.486861  | -0.756705 | C       | -4.849228 | 4.646064  | 2.414435  |
| C     | 5.629119  | -3.558666 | -1.157999 | H     | 4.230395  | 0.549037  | -0.735786 | H       | -5.874628 | 4.961217  | 2.645686  |
| H     | 5.110374  | -3.976266 | -2.036165 | O     | 2.453394  | 4.854456  | -0.856362 | H       | -4.243939 | 4.629757  | 3.336172  |
| H     | 6.714019  | -3.572199 | -1.318534 | O     | 5.338487  | -1.738370 | -0.516336 | H       | -4.399589 | 5.336282  | 1.681311  |
| H     | 5.369936  | -4.134531 | -0.254813 | C     | 1.824190  | 6.161235  | -0.868226 | C       | -5.139952 | -4.626280 | -1.660399 |
| C     | 2.766743  | 6.043588  | 0.293534  | H     | 1.374894  | 6.376505  | 0.113836  | H       | -6.185622 | -4.889838 | -1.863979 |
| H     | 3.665405  | 6.672099  | 0.284486  | H     | 2.634704  | 6.868525  | -1.079902 | H       | -4.560403 | -4.633719 | -2.598558 |
| H     | 2.090448  | 6.333629  | -0.526763 | H     | 1.058393  | 6.208503  | -1.658385 | H       | -4.703666 | -5.341999 | -0.943656 |
| H     | 2.249101  | 6.132952  | 1.262029  | C     | 5.875737  | -3.076486 | -0.363765 | C       | 4.870243  | 4.425191  | -2.112964 |
| H     | -0.493735 | -1.881767 | -3.231367 | H     | 6.945362  | -2.983870 | -0.586118 | H       | 4.444421  | 5.151763  | -1.400917 |
| C     | -1.294796 | -1.417287 | -2.653517 | H     | 5.730189  | -3.432133 | 0.668516  | H       | 5.904996  | 4.699337  | -2.354860 |
| C     | -2.469394 | -2.123124 | -2.382701 | H     | 5.395506  | -3.765226 | -1.076675 | H       | 4.263368  | 4.400464  | -3.033404 |
| C     | -1.132277 | -0.083645 | -2.179039 | Br    | -0.513842 | 0.100219  | 2.826998  | C       | 4.870162  | -4.660754 | 2.371635  |
| C     | -3.540363 | -1.517822 | -1.673647 |       |           |           |           | H       | 4.410619  | -5.370507 | 1.663653  |
| H     | -2.585614 | -3.151470 | -2.732516 | 69    |           |           |           | H       | 5.907843  | -4.953206 | 2.576347  |
| C     | -2.186532 | 0.528345  | -1.428084 | HAT_B |           |           |           | H       | 4.293159  | -4.640106 | 3.311149  |
| H     | -0.313714 | 0.532093  | -2.556891 | N     | 1.484383  | 1.164097  | -0.209577 | C       | -1.150758 | -0.453701 | -7.421123 |
| C     | -3.378865 | -0.209956 | -1.228097 | N     | 1.473483  | -1.305340 | 0.649567  | C       | -0.113868 | 0.247099  | -8.065710 |
| H     | -4.461250 | -2.070324 | -1.487433 | C     | 1.403934  | 2.382432  | -0.784554 | C       | 0.907331  | 0.849849  | -7.306988 |
| H     | -2.156622 | 1.593592  | -1.202317 | C     | 2.503239  | 3.116423  | -1.235176 | C       | 0.896541  | 0.755762  | -5.898071 |
| Br    | -4.861817 | 0.670604  | -0.269993 | C     | 3.789675  | 2.529673  | -1.106555 | C       | -0.145403 | 0.053589  | -5.292491 |
|       |           |           |           | C     | 3.785965  | -2.729835 | 1.437833  | C       | -1.172436 | -0.556244 | -6.012627 |
| 46    |           |           |           | C     | 2.493630  | -3.290837 | 1.613893  | H       | -1.945712 | -0.922748 | -8.008127 |
| B6_Br |           |           |           | C     | 1.392721  | -2.531560 | 1.210001  | H       | -0.101639 | 0.323005  | -9.155542 |
| Ni    | -0.660571 | -0.328820 | 0.287060  | C     | 2.735199  | 0.589893  | -0.089683 | H       | 1.714927  | 1.393906  | -7.805191 |
| N     | 0.225510  | 1.421976  | -0.133422 | C     | 3.896137  | 1.253023  | -0.535999 | H       | 1.685944  | 1.222636  | -5.303873 |
| N     | 1.301753  | -0.964577 | 0.112232  | C     | 3.895070  | -1.448464 | 0.877244  | H       | -1.975828 | -1.098488 | -5.508200 |
| C     | -0.384560 | 2.624970  | -0.135798 | C     | 2.732165  | -0.752378 | 0.492065  | Br      | -0.165501 | -0.080263 | -3.014969 |
| C     | 0.284027  | 3.827496  | -0.367563 | H     | 0.395746  | 2.782900  | -0.895531 |         |           |           |           |
| C     | 1.673103  | 3.781738  | -0.611483 | H     | 2.350600  | 4.098475  | -1.678282 | 58      |           |           |           |
| C     | 4.019129  | -1.556420 | -0.293614 | H     | 2.337836  | -4.275414 | 2.050232  | LDTs_Br |           |           |           |
| C     | 3.110246  | -2.569180 | 0.080207  | H     | 0.381908  | -2.921673 | 1.339497  | N       | -2.307984 | -0.700853 | -1.342231 |
| C     | 1.771554  | -2.215091 | 0.267826  | Ni    | -0.064747 | -0.074155 | 0.180937  | N       | -1.064525 | 1.471963  | -0.201297 |
| C     | 1.579332  | 1.372315  | -0.340687 | N     | -1.638598 | -1.318070 | -0.067641 | C       | -3.026609 | -1.552022 | -2.088917 |
| C     | 2.321397  | 2.527936  | -0.591878 | N     | -1.568319 | 1.190009  | 0.669535  | C       | -4.369842 | -1.868180 | -1.837451 |
| C     | 3.535893  | -0.238682 | -0.451407 | C     | -1.598409 | -2.571877 | -0.566503 | C       | -4.999267 | -1.241192 | -0.739040 |
| C     | 2.180753  | 0.021419  | -0.237849 | C     | -2.878233 | -0.724968 | 0.082242  | C       | -1.376521 | 1.851606  | 2.587353  |
| H     | -1.454812 | 2.619440  | 0.057481  | C     | -1.449995 | 2.439329  | 1.169193  | C       | -0.358918 | 2.526633  | 1.876945  |
| H     | -0.276010 | 4.759720  | -0.350730 | C     | -2.837590 | 0.645016  | 0.592391  | C       | -0.259830 | 2.296216  | 0.499174  |
| H     | 3.414946  | -3.603724 | 0.222827  | C     | -2.724609 | -3.318495 | -0.918724 | C       | -2.915412 | -0.085562 | -0.293009 |
| H     | 1.034176  | -2.965134 | 0.554739  | H     | -0.601577 | -2.995368 | -0.694903 | C       | -4.256407 | -0.328338 | 0.038377  |
| C     | -2.418618 | 0.326277  | -0.127116 | C     | -4.064986 | -1.400066 | -0.269304 | C       | -2.251506 | 1.012693  | 1.869903  |
| C     | -2.598426 | 0.581430  | -1.498434 | C     | -2.524698 | 3.229151  | 1.585624  | C       | -2.066472 | 0.853158  | 0.489444  |
| C     | -3.421707 | 0.644131  | 0.799479  | H     | -0.430417 | 2.822572  | 1.237328  | H       | -2.496666 | -1.998743 | -2.933136 |



Ni -0.518270 -0.590722 -0.766845  
N 1.483816 -0.397554 -0.468460  
N -0.375949 1.446521 -0.512578  
C 2.356047 -1.420754 -0.435190  
C 3.694703 -1.278772 -0.058161  
C 4.149877 0.008054 0.303101  
C 0.095038 4.199778 -0.179957  
C -1.184461 3.728760 -0.546114  
C -1.358904 2.350278 -0.693852  
C 1.917326 0.849059 -0.119178  
C 3.238828 1.085857 0.268533  
C 1.140008 3.264271 -0.017624  
C 0.877291 1.905070 -0.203759  
H 1.953042 -2.389744 -0.728966  
H 4.345560 -2.150473 -0.052994  
H -2.027575 4.396038 -0.711283  
H -2.333175 1.945837 -0.965141  
C -0.872633 -1.542380 0.979483  
C -0.609785 -0.717606 2.094163  
C -0.510064 -2.908307 0.995907  
C 0.105939 -1.244857 3.183469  
H -0.901459 0.330353 2.093961  
C 0.205194 -3.416547 2.092050  
H -0.752364 -3.546661 0.146618  
C 0.519122 -2.589657 3.188251  
H 0.344053 -0.591590 4.026949  
H 0.508567 -4.466543 2.088262  
H 1.069181 -2.992670 4.041436  
S -2.637898 -1.208350 -0.287516  
C -3.589453 -0.279791 0.974234  
F -3.734618 -0.951118 2.157598  
F -3.104162 0.956760 1.292926  
F -4.856258 -0.086883 0.482179  
H 3.581133 2.080343 0.548897  
H 2.136746 3.622460 0.234255  
O 5.411970 0.305790 0.689257  
O 0.417620 5.496629 0.022604  
C 6.374178 -0.775096 0.751665  
H 6.512321 -1.224261 -0.244916  
H 7.307813 -0.310408 1.090573  
H 6.045237 -1.540569 1.472649  
C -0.620206 6.491236 -0.160896  
H -0.138991 7.452981 0.053308  
H -0.989120 6.472496 -1.198769  
H -1.450158 6.315385 0.541919  
Br -0.377074 -2.194619 -2.716672

Substrate: Chlorobenzene

39

A2\_Cl

N -0.363289 0.973281 -0.295551  
C -2.794852 -2.154243 -0.230887  
C -4.179873 -2.124038 -0.037221  
C -4.797209 -0.869535 0.157751  
C -1.113271 3.672963 0.077268  
C 0.236296 3.324738 -0.146666  
C 0.548453 1.972928 -0.324213  
C -2.612430 0.164778 -0.051567  
C -3.989947 0.287626 0.149463  
C -2.077816 2.643744 0.114709  
C -1.677194 1.318053 -0.073951  
H -2.278902 -3.103312 -0.381403  
H -4.742604 -3.055746 -0.041167  
H 1.031729 4.067074 -0.182459  
H 1.579354 1.663493 -0.495661  
H 3.355132 -2.136508 2.055229  
C 2.656072 -2.274382 1.228737  
C 1.714812 -3.362485 1.248640  
C 2.675295 -1.430503 0.135585  
C 0.849618 -3.570669 0.186659  
C 1.763746 -1.536910 -0.981071  
C 0.816780 -2.668975 -0.946862  
H 0.182065 -4.437540 0.189982  
H 2.092722 -1.117397 -1.940844  
H 0.424953 -3.066768 -1.894277  
H 1.711052 -4.037175 2.108703  
H -4.456731 1.259707 0.302141  
H -3.121267 2.901900 0.290936  
O -6.125844 -0.675135 0.356969  
O -1.574055 4.935860 0.263659  
C -0.609391 6.012922 0.245503  
H -0.101002 6.060874 -0.731216  
H -1.191584 6.927291 0.413331  
H 0.131573 5.880875 1.050839  
C -6.978451 -1.842506 0.381804  
H -6.692863 -2.512510 1.209360  
H -7.993029 -1.457102 0.540947  
H -6.924186 -2.382145 -0.577748  
Cl 3.908147 -0.131976 0.066207

39

A3\_Cl

N -1.251384 -0.953708 0.027127  
C 0.429862 2.628903 0.014842  
C -0.247582 3.848278 -0.021139  
C -1.657413 3.835421 -0.050649  
C -4.016539 -1.501857 0.053266  
C -3.073054 -2.551196 0.049644  
C -1.715119 -2.220173 0.038207  
C -1.560501 1.409359 0.005064  
C -2.310430 2.586287 -0.034733  
C -3.544635 -0.172280 0.039016  
C -2.167527 0.063478 0.023239

H 1.515965 2.616033 0.034486  
H 0.330385 4.769992 -0.027964  
H -3.367065 -3.598743 0.057769  
H -0.953700 -2.999519 0.039153  
C 2.421001 0.392819 0.099974  
C 3.024108 0.721555 1.333418  
C 3.111462 0.689043 -1.095205  
C 4.283661 1.354707 1.370613  
H 2.512275 0.492784 2.272732  
C 4.370682 1.322691 -1.058871  
H 2.668745 0.432578 -2.061993  
C 4.960317 1.660239 0.174366  
H 4.735364 1.605425 2.335299  
H 4.890846 1.547776 -1.994938  
H 5.937456 2.149484 0.203056  
H -3.398070 2.557829 -0.058688  
H -4.263898 0.644599 0.045660  
O -2.450940 4.929091 -0.093876  
O -5.359752 -1.661167 0.070883  
C -1.811177 6.228601 -0.125069  
H -2.632604 6.954613 -0.151708  
H -1.201150 6.377911 0.779909  
H -1.186113 6.326075 -1.027102  
C -5.880299 -3.012542 0.108152  
H -6.970878 -2.900403 0.128951  
H -5.571976 -3.568453 -0.791799  
H -5.532300 -3.532216 1.015146  
Cl 1.588357 -2.351320 0.059383

69

ADTS\_Cl

N 2.374891 1.063159 -0.374753  
N 1.957155 -1.505812 0.219688  
C 2.579725 2.385164 -0.581457  
C 3.825565 3.012594 -0.566406  
C 4.969803 2.221589 -0.294933  
C 3.947189 -3.478396 -0.245363  
C 2.622801 -3.847628 0.099394  
C 1.690341 -2.827869 0.297233  
C 3.503065 0.285743 -0.181445  
C 4.792190 0.843351 -0.104970  
C 4.249885 -2.112382 -0.351204  
C 3.253782 -1.153590 -0.092546  
H 1.685459 2.973996 -0.781457  
H 3.891514 4.080858 -0.763628  
H 2.321454 -4.886513 0.219006  
H 0.660603 -3.092685 0.545076  
Ni 0.579294 0.154617 0.045722  
N -0.751510 1.791108 -0.136383  
N -0.827702 -0.635982 -1.221648  
C -0.555891 3.069211 0.247794  
C -1.773962 1.560661 -1.027770  
C -0.899265 -1.909746 -1.669312  
C -1.931961 0.163438 -1.441564  
C -1.320602 4.157429 -0.177483  
H 0.249429 3.221172 0.966064  
C -2.579167 2.596623 -1.533360

C -2.010895 -2.471733 -2.299479  
H -0.004420 -2.513050 -1.520856  
C -3.106120 -0.330895 -2.032518  
C -2.367722 3.914628 -1.099598  
H -1.111518 5.150882 0.214868  
C -3.159801 -1.662814 -2.471496  
H -1.970582 -3.504269 -2.640727  
H -3.985134 0.303827 -2.138722  
H -3.347823 2.394679 -2.278796  
H 5.656491 0.217185 0.114923  
H 5.250665 -1.809058 -0.657136  
O -4.329498 -2.072856 -3.032075  
O -3.185134 4.868500 -1.623790  
O 4.958603 -4.350040 -0.506549  
O 6.242472 2.694156 -0.197995  
C -4.414122 -3.445136 -3.457033  
H -5.431144 -3.570170 -3.850213  
H -3.678343 -3.658689 -4.250740  
H -4.252636 -4.131331 -2.608758  
C -2.956487 6.230138 -1.219121  
H -3.700393 6.827879 -1.761223  
H -3.102260 6.350553 -0.132451  
H -1.939611 6.559028 -1.493616  
C 6.435288 4.112225 -0.346873  
H 5.866536 4.669877 0.416497  
H 7.510778 4.279655 -0.205660  
H 6.133377 4.451093 -1.352223  
C 4.660312 -5.755507 -0.420689  
H 3.862368 -6.033525 -1.129900  
H 5.591589 -6.271397 -0.687481  
H 4.358517 -6.033967 0.602949  
H -0.209989 -1.685182 1.775605  
C -0.397727 -0.637221 1.992498  
C -1.718621 -0.211531 2.246102  
C 0.675053 0.250875 2.323168  
C -2.015686 1.050378 2.771809  
C 0.383260 1.497334 2.935922  
H 1.693565 -0.135548 2.366782  
C -0.945471 1.898865 3.128741  
H -1.167192 2.875462 3.565844  
H -3.050078 1.359040 2.927771  
H 1.203791 2.153199 3.236292  
Cl -3.055360 -1.319886 1.838867

69

BIT\_Cl

N 1.588762 1.251502 -0.207892  
N 1.664290 -1.307450 0.328426  
C 1.483636 2.543938 -0.586329  
C 2.565796 3.389582 -0.841457  
C 3.874165 2.846208 -0.711919  
C 4.005577 -2.722623 1.050660  
C 2.732993 -3.354421 1.095749  
C 1.617216 -2.594742 0.732714  
C 2.866804 0.720528 -0.080336  
C 4.015001 1.504958 -0.336124  
C 4.081678 -1.379875 0.659766

|    |           |           |           |       |           |           |           |       |           |           |           |
|----|-----------|-----------|-----------|-------|-----------|-----------|-----------|-------|-----------|-----------|-----------|
| C  | 2.904023  | -0.682237 | 0.306004  | Cl    | 1.474439  | -1.405390 | -3.980059 | C     | 4.883842  | -4.630008 | 2.359694  |
| H  | 0.465029  | 2.916429  | -0.704554 |       |           |           |           | H     | 4.414171  | -5.335018 | 1.654584  |
| H  | 2.386788  | 4.422068  | -1.135301 | 58    |           |           |           | H     | 5.925351  | -4.918658 | 2.546650  |
| H  | 2.603755  | -4.390895 | 1.400647  | B2_Cl |           |           |           | H     | 4.320483  | -4.608885 | 3.306741  |
| H  | 0.621573  | -3.041000 | 0.763149  | N     | 1.492655  | 1.176976  | -0.256823 | Cl    | -0.067556 | -0.061267 | -4.010004 |
| Ni | 0.103011  | -0.121602 | -0.133312 | N     | 1.485033  | -1.261151 | 0.683034  | 28    |           |           |           |
| N  | -1.242172 | -1.405093 | -0.920636 | C     | 1.402173  | 2.390397  | -0.840161 | B3_Cl |           |           |           |
| N  | -1.571219 | 0.977994  | 0.107186  | C     | 2.504229  | 3.124688  | -1.287624 | C     | -0.631805 | -2.652854 | 0.008287  |
| C  | -0.985353 | -2.593216 | -1.505116 | C     | 3.787705  | 2.559005  | -1.128106 | C     | -1.867801 | -3.305401 | 0.006385  |
| C  | -2.528465 | -0.897058 | -1.032949 | C     | 3.787926  | -2.699229 | 1.445605  | C     | -3.039725 | -2.516491 | 0.003288  |
| C  | -1.688446 | 2.171627  | 0.725709  | C     | 2.500583  | -3.246152 | 1.641576  | C     | -2.017341 | 3.253235  | -0.000154 |
| C  | -2.723244 | 0.405542  | -0.415722 | C     | 1.396505  | -2.485604 | 1.245497  | C     | -0.645644 | 3.591612  | 0.001397  |
| C  | -1.926194 | -3.356071 | -2.201915 | C     | 2.738896  | 0.623919  | -0.112420 | C     | 0.290575  | 2.553463  | 0.003995  |
| H  | 0.042367  | -2.946719 | -1.418845 | C     | 3.896357  | 1.284796  | -0.531028 | C     | -1.633664 | -0.542264 | 0.004452  |
| C  | -3.535882 | -1.600573 | -1.729304 | C     | 3.896063  | -1.417247 | 0.865967  | C     | -2.908710 | -1.111587 | 0.002427  |
| C  | -2.880028 | 2.894953  | 0.838356  | C     | 2.736634  | -0.729738 | 0.497530  | C     | -2.378029 | 1.889030  | 0.000765  |
| H  | -0.766543 | 2.572659  | 1.151256  | H     | 0.392117  | 2.783397  | -0.959228 | C     | -1.376032 | 0.916341  | 0.003372  |
| C  | -3.970105 | 1.066376  | -0.334112 | H     | 2.347716  | 4.093346  | -1.757605 | H     | 0.297467  | -3.224279 | 0.010683  |
| C  | -3.241908 | -2.834905 | -2.319193 | H     | 2.344590  | -4.226892 | 2.086411  | H     | -1.899709 | -4.393259 | 0.007382  |
| H  | -1.629908 | -4.305038 | -2.644929 | H     | 0.384961  | -2.870756 | 1.381524  | H     | -0.302141 | 4.624321  | 0.000734  |
| C  | -4.055590 | 2.321337  | 0.280801  | Ni    | -0.046920 | -0.037920 | 0.203556  | H     | 1.359993  | 2.769885  | 0.005340  |
| H  | -2.881242 | 3.857601  | 1.345710  | N     | -1.592348 | -1.260337 | -0.208228 | Ni    | 1.201643  | -0.298826 | 0.009397  |
| H  | -4.872192 | 0.611125  | -0.742068 | N     | -1.570221 | 1.186178  | 0.703290  | H     | -3.432326 | 1.616010  | -0.000455 |
| H  | -4.536042 | -1.182842 | -1.839437 | C     | -1.511698 | -2.488683 | -0.761166 | H     | -3.804125 | -0.492104 | 0.000091  |
| H  | 5.013825  | 1.075346  | -0.263210 | C     | -2.837975 | -0.721543 | -0.013638 | O     | -3.038405 | 4.143302  | -0.002454 |
| H  | 5.051092  | -0.882108 | 0.654303  | C     | -1.471752 | 2.427340  | 1.226322  | O     | -4.304506 | -3.001830 | 0.001029  |
| O  | -5.289452 | 2.907135  | 0.307551  | C     | -2.825243 | 0.651201  | 0.552298  | C     | -2.705133 | 5.551430  | -0.003658 |
| O  | -4.258769 | -3.447911 | -2.996194 | C     | -2.623136 | -3.253102 | -1.127523 | H     | -2.128905 | 5.810442  | -0.906649 |
| O  | 5.182217  | -3.331345 | 1.382065  | H     | -0.502401 | -2.868402 | -0.922484 | H     | -3.667601 | 6.077331  | -0.005695 |
| O  | 5.025681  | 3.542354  | -0.945262 | C     | -4.004614 | -1.416688 | -0.342761 | H     | -2.131537 | 5.812613  | 0.900383  |
| C  | -5.403583 | 4.204387  | 0.926433  | C     | -2.568540 | 3.201476  | 1.616005  | C     | -4.475630 | -4.438804 | 0.000848  |
| H  | -6.459448 | 4.485830  | 0.824362  | H     | -0.457833 | 2.814552  | 1.335857  | H     | -5.560482 | -4.600376 | -0.001257 |
| H  | -5.129739 | 4.155161  | 1.993638  | C     | -3.978154 | 1.355096  | 0.910518  | H     | -4.024101 | -4.880604 | -0.902030 |
| H  | -4.765768 | 4.941851  | 0.410821  | C     | -3.906038 | -2.706018 | -0.908152 | H     | -4.027712 | -4.880457 | 0.905589  |
| C  | -3.974096 | -4.711632 | -3.627920 | H     | -2.474708 | -4.232270 | -1.577995 | Cl    | 3.386998  | -0.536208 | 0.014711  |
| H  | -4.911047 | -5.015609 | -4.112290 | C     | -3.859506 | 2.652843  | 1.451666  | 46    |           |           |           |
| H  | -3.178413 | -4.602733 | -4.384120 | H     | -2.404692 | 4.194563  | 2.029568  | B5_Cl |           |           |           |
| H  | -3.676385 | -5.465389 | -2.879771 | H     | -4.969883 | 0.922752  | 0.787095  | Ni    | -0.504010 | -0.208779 | -0.074185 |
| C  | 4.904480  | 4.926174  | -1.332470 | H     | -4.990620 | -0.979952 | -0.191913 | N     | 1.339809  | -0.999470 | -0.356296 |
| H  | 4.400810  | 5.509828  | -0.543769 | H     | 4.880056  | 0.828709  | -0.430330 | N     | 0.589513  | 1.482445  | -0.055176 |
| H  | 5.933374  | 5.285134  | -1.463755 | H     | 4.883914  | -0.980958 | 0.725440  | C     | 1.634735  | -2.303925 | -0.527313 |
| H  | 4.349129  | 5.019882  | -2.280834 | O     | -5.018913 | 3.273356  | 1.780849  | C     | 2.928981  | -2.786236 | -0.741449 |
| C  | 5.128503  | -4.709087 | 1.805645  | O     | -5.077114 | -3.319465 | -1.206695 | C     | 3.988656  | -1.852539 | -0.781688 |
| H  | 4.719792  | -5.349521 | 1.006259  | O     | 4.952960  | -3.306494 | 1.779529  | C     | 2.329993  | 3.693695  | 0.061770  |
| H  | 6.168192  | -4.989969 | 2.017152  | O     | 4.949325  | 3.140918  | -1.513504 | C     | 0.936142  | 3.865918  | 0.215416  |
| H  | 4.518130  | -4.812779 | 2.718432  | C     | -4.938127 | 4.603506  | 2.344026  | C     | 0.122781  | 2.731832  | 0.149836  |
| C  | -1.195797 | 1.543697  | -3.257684 | H     | -5.976570 | 4.900184  | 2.535438  | C     | 3.692732  | -0.485409 | -0.603495 |
| C  | -2.332683 | 1.111579  | -3.959298 | H     | -4.367446 | 4.590385  | 3.286874  | C     | 2.831130  | 2.391780  | -0.144844 |
| C  | -2.297754 | -0.100368 | -4.672396 | H     | -4.470372 | 5.297851  | 1.627185  | C     | 1.943329  | 1.312859  | -0.197171 |
| C  | -1.127821 | -0.882625 | -4.690028 | C     | -5.016416 | -4.637144 | -1.801634 | H     | 0.788053  | -2.990030 | -0.485644 |
| C  | -0.005879 | -0.427682 | -3.983148 | H     | -6.060765 | -4.926603 | -1.970795 | H     | 3.090272  | -3.855423 | -0.864390 |
| C  | -0.018780 | 0.773907  | -3.259481 | H     | -4.471578 | -4.603853 | -2.758703 | H     | 0.483086  | 4.840428  | 0.385155  |
| H  | -1.221706 | 2.472988  | -2.685694 | H     | -4.530974 | -5.347941 | -1.112987 | H     | -0.957502 | 2.821045  | 0.271474  |
| H  | -3.247585 | 1.707305  | -3.937227 | C     | 4.876787  | 4.445504  | -2.135003 | S     | -1.666418 | -1.063181 | 1.675576  |
| H  | -3.181578 | -0.450734 | -5.209922 | H     | 4.434099  | 5.178468  | -1.440844 |       |           |           |           |
| H  | -1.096818 | -1.827956 | -5.232887 | H     | 5.915555  | 4.716245  | -2.360242 |       |           |           |           |
| H  | 0.860818  | 1.093545  | -2.706151 | H     | 4.287289  | 4.398216  | -3.064637 |       |           |           |           |

|       |           |           |           |       |           |           |           |         |           |           |           |
|-------|-----------|-----------|-----------|-------|-----------|-----------|-----------|---------|-----------|-----------|-----------|
| C     | -0.361384 | -1.535001 | 2.792744  | H     | -5.408662 | 1.516589  | 1.055675  | H       | -4.989937 | -0.855155 | -0.240788 |
| F     | 0.373570  | -2.647261 | 2.396362  | H     | -5.699074 | 2.034572  | -1.379761 | H       | 4.920569  | 0.851064  | -0.311481 |
| F     | 0.596066  | -0.555767 | 3.026795  | S     | -1.652264 | -2.368571 | 0.504466  | H       | 4.908391  | -0.983321 | 0.841579  |
| F     | -0.835366 | -1.868278 | 4.056876  | C     | -1.694469 | -2.887313 | -1.217057 | O       | -4.976753 | 3.327344  | 1.916321  |
| H     | 4.503037  | 0.241630  | -0.629895 | F     | -2.873937 | -2.609149 | -1.874280 | O       | -5.106953 | -3.207163 | -1.244826 |
| H     | 3.904440  | 2.246521  | -0.256210 | F     | -0.705049 | -2.327338 | -2.002606 | O       | 4.960736  | -3.355028 | 1.799158  |
| O     | 5.292219  | -2.162767 | -0.984269 | F     | -1.534836 | -4.252942 | -1.322694 | O       | 5.010581  | 3.215755  | -1.286059 |
| O     | 3.245827  | 4.690446  | 0.099987  | H     | 3.378121  | 2.476015  | -0.778547 | C       | -4.867521 | 4.647183  | 2.487997  |
| C     | 5.635136  | -3.557811 | -1.159075 | H     | 4.209076  | 0.535874  | -0.753356 | H       | -5.897564 | 4.955645  | 2.707785  |
| H     | 5.116176  | -3.975701 | -2.036983 | O     | 2.436337  | 4.842702  | -0.894007 | H       | -4.276120 | 4.623548  | 3.418593  |
| H     | 6.719964  | -3.570715 | -1.320181 | O     | 5.313150  | -1.754558 | -0.548067 | H       | -4.409930 | 5.347984  | 1.769817  |
| H     | 5.376783  | -4.133899 | -0.255788 | C     | 1.807181  | 6.149300  | -0.930694 | C       | -5.047189 | -4.524874 | -1.828340 |
| C     | 2.766168  | 6.042411  | 0.295839  | H     | 1.370424  | 6.390515  | 0.051061  | H       | -6.088582 | -4.794472 | -2.046065 |
| H     | 3.664318  | 6.671678  | 0.287827  | H     | 2.614974  | 6.850446  | -1.171060 | H       | -4.459348 | -4.514604 | -2.761471 |
| H     | 2.090026  | 6.332710  | -0.524497 | H     | 1.031187  | 6.175843  | -1.711794 | H       | -4.611568 | -5.247908 | -1.118450 |
| H     | 2.247974  | 6.130524  | 1.264162  | C     | 5.848356  | -3.094721 | -0.406071 | C       | 4.934894  | 4.535304  | -1.863415 |
| H     | -0.502310 | -1.882486 | -3.243812 | H     | 6.913865  | -3.005972 | -0.648699 | H       | 4.498071  | 5.251717  | -1.147606 |
| C     | -1.300591 | -1.417629 | -2.662381 | H     | 5.721401  | -3.450468 | 0.628589  | H       | 5.972297  | 4.815082  | -2.087277 |
| C     | -2.475665 | -2.122006 | -2.386972 | H     | 5.351941  | -3.781103 | -1.110129 | H       | 4.340674  | 4.523473  | -2.792490 |
| C     | -1.135717 | -0.084698 | -2.186984 | Cl    | -0.633434 | 0.032562  | 2.697526  | C       | 4.866688  | -4.678035 | 2.366247  |
| C     | -3.539756 | -1.517364 | -1.670561 |       |           |           |           | H       | 4.407984  | -5.379437 | 1.649349  |
| H     | -2.594053 | -3.149425 | -2.738593 | 69    |           |           |           | H       | 5.900977  | -4.979515 | 2.575591  |
| C     | -2.184969 | 0.526152  | -1.432092 | HAT_B |           |           |           | H       | 4.283263  | -4.662657 | 3.302049  |
| H     | -0.315130 | 0.528949  | -2.563507 | N     | 1.520346  | 1.216798  | -0.112078 | C       | -1.343204 | -0.813200 | -6.952630 |
| C     | -3.381415 | -0.207629 | -1.219431 | N     | 1.497866  | -1.274229 | 0.685982  | C       | -0.369376 | -0.165577 | -7.735682 |
| H     | -4.460971 | -2.067174 | -1.475230 | C     | 1.450124  | 2.455697  | -0.642921 | C       | 0.684055  | 0.535488  | -7.119451 |
| H     | -2.155821 | 1.590802  | -1.201386 | C     | 2.556018  | 3.206490  | -1.048669 | C       | 0.774490  | 0.596458  | -5.712129 |
| Cl    | -4.702930 | 0.580180  | -0.343372 | C     | 3.841900  | 2.615824  | -0.914924 | C       | -0.212328 | -0.060795 | -4.982995 |
|       |           |           |           | C     | 3.800000  | -2.727849 | 1.450648  | C       | -1.272675 | -0.767006 | -5.543797 |
| 46    |           |           |           | C     | 2.503785  | -3.292364 | 1.597159  | H       | -2.162482 | -1.356796 | -7.430016 |
| B6_Cl |           |           |           | C     | 1.408934  | -2.516838 | 1.206641  | H       | -0.431338 | -0.207035 | -8.825257 |
| Ni    | -0.677763 | -0.329195 | 0.337050  | C     | 2.772645  | 0.636953  | 0.013784  | H       | 1.441388  | 1.038172  | -7.726486 |
| N     | 0.218251  | 1.425033  | -0.081770 | C     | 3.941051  | 1.322971  | -0.384475 | H       | 1.585573  | 1.135719  | -5.220027 |
| N     | 1.292799  | -0.965216 | 0.156242  | C     | 3.919488  | -1.432723 | 0.928909  | H       | -2.019834 | -1.264228 | -4.922928 |
| C     | -0.389599 | 2.628847  | -0.083822 | C     | 2.761491  | -0.718413 | 0.551950  | Cl      | -0.096366 | 0.007493  | -2.908155 |
| C     | 0.276315  | 3.827407  | -0.342891 | H     | 0.443450  | 2.862341  | -0.751879 |         |           |           |           |
| C     | 1.659809  | 3.775549  | -0.615874 | H     | 2.409617  | 4.203850  | -1.458287 | 58      |           |           |           |
| C     | 3.999456  | -1.567229 | -0.298798 | H     | 2.341943  | -4.290009 | 2.000364  | LDTS_Cl |           |           |           |
| C     | 3.095160  | -2.575712 | 0.097087  | H     | 0.395545  | -2.908231 | 1.313904  | N       | 1.812846  | 1.414059  | -1.821679 |
| C     | 1.761354  | -2.216523 | 0.308182  | Ni    | -0.029049 | -0.017490 | 0.258491  | N       | 1.510895  | -1.046229 | -0.625856 |
| C     | 1.567733  | 1.369536  | -0.313983 | N     | -1.590602 | -1.246078 | -0.083928 | C       | 2.136007  | 2.464891  | -2.590280 |
| C     | 2.306842  | 2.520905  | -0.592010 | N     | -1.542715 | 1.236334  | 0.737084  | C       | 3.264296  | 3.271587  | -2.380383 |
| C     | 3.517690  | -0.248206 | -0.451838 | C     | -1.534763 | -2.478713 | -0.630310 | C       | 4.112259  | 2.946402  | -1.298899 |
| C     | 2.167826  | 0.017167  | -0.213100 | C     | -2.837383 | -0.659912 | 0.061997  | C       | 2.127908  | -1.299832 | 2.123291  |
| H     | -1.456054 | 2.626802  | 0.130692  | C     | -1.438117 | 2.471313  | 1.272789  | C       | 1.400903  | -2.308232 | 1.452027  |
| H     | -0.281785 | 4.760742  | -0.325679 | C     | -2.811201 | 0.689900  | 0.614492  | C       | 1.126403  | -2.119755 | 0.091482  |
| H     | 3.399364  | -3.610522 | 0.238068  | C     | -2.649979 | -3.217092 | -1.033232 | C       | 2.634745  | 1.092693  | -0.786628 |
| H     | 1.026185  | -2.963797 | 0.607982  | H     | -0.532262 | -2.890675 | -0.755551 | C       | 3.790353  | 1.832745  | -0.495973 |
| C     | -2.431039 | 0.326971  | -0.111048 | C     | -4.014783 | -1.333141 | -0.330679 | C       | 2.554537  | -0.176582 | 1.387550  |
| C     | -2.586149 | 0.594253  | -1.481891 | H     | -0.420507 | 2.853681  | 1.372644  | C       | 2.236951  | -0.091254 | 0.024124  |
| C     | -3.443642 | 0.640316  | 0.805334  | C     | -3.959415 | 1.407093  | 1.014055  | H       | 1.455307  | 2.675019  | -3.418027 |
| C     | -3.767353 | 1.215213  | -1.936795 | C     | -3.930363 | -2.619988 | -0.878206 | H       | 1.049291  | -3.206500 | 1.957284  |
| H     | -1.800581 | 0.339761  | -2.197426 | H     | -2.514357 | -4.210382 | -1.456145 | H       | 0.548263  | -2.870962 | -0.452232 |
| C     | -4.619772 | 1.265475  | 0.341450  | C     | -3.824582 | 2.695744  | 1.548318  | Ni      | -0.138290 | 0.014833  | -2.008584 |
| H     | -3.322138 | 0.410143  | 1.863693  | H     | -2.349504 | 4.240512  | 2.100672  | N       | -1.643553 | -1.301269 | -1.715100 |
| C     | -4.783596 | 1.554521  | -1.025751 | H     | -4.952267 | 0.965106  | 0.933327  | N       | -0.921958 | 0.770461  | -0.294948 |
| H     | -3.883322 | 1.429990  | -3.002583 |       |           |           |           |         |           |           |           |

|        |           |           |           |        |           |           |           |          |           |           |           |
|--------|-----------|-----------|-----------|--------|-----------|-----------|-----------|----------|-----------|-----------|-----------|
| C      | -1.984317 | -2.327775 | -2.523554 | H      | -2.003510 | 4.483658  | -2.678240 | S        | 1.441993  | -2.219098 | 1.790974  |
| C      | -2.291586 | -1.187640 | -0.510324 | H      | -2.659992 | 2.762488  | -0.998145 | C        | 1.557795  | -0.984089 | 3.061455  |
| C      | -0.496857 | 1.855139  | 0.390837  | C      | -1.754015 | -0.773938 | 2.279744  | F        | 2.567030  | -0.040344 | 2.884314  |
| C      | -1.855106 | -0.036801 | 0.310220  | C      | -1.549169 | -0.434447 | 3.640080  | F        | 0.410211  | -0.220261 | 3.245471  |
| C      | -2.954558 | -3.282853 | -2.204718 | C      | -1.738263 | -2.139128 | 1.901417  | F        | 1.818827  | -1.531900 | 4.311293  |
| H      | -1.444135 | -2.370068 | -3.470246 | C      | -1.380957 | -1.444559 | 4.604492  | H        | -0.427718 | 3.922690  | -0.124446 |
| C      | -3.281528 | -2.095643 | -0.113088 | H      | -1.536066 | 0.615310  | 3.945294  | H        | -2.419055 | 3.274538  | 0.273018  |
| C      | -0.930825 | 2.193219  | 1.674891  | C      | -1.569469 | -3.141299 | 2.874357  | O        | 1.969822  | 4.774922  | -0.339834 |
| H      | 0.239166  | 2.474491  | -0.120628 | H      | -1.870439 | -2.417261 | 0.852383  | O        | -4.865140 | 2.550524  | 0.426289  |
| C      | -2.333822 | 0.217429  | 1.602016  | C      | -1.395161 | -2.805090 | 4.232891  | C        | 3.361729  | 5.155591  | -0.459809 |
| C      | -3.623216 | -3.164050 | -0.965102 | H      | -1.226246 | -1.164092 | 5.651215  | H        | 3.823107  | 4.662155  | -1.330301 |
| H      | -3.172304 | -4.083757 | -2.909031 | H      | -1.561966 | -4.191216 | 2.564874  | H        | 3.352041  | 6.242959  | -0.602348 |
| C      | -1.867269 | 1.343508  | 2.305918  | H      | -1.267060 | -3.586798 | 4.985538  | H        | 3.911470  | 4.895635  | 0.459087  |
| H      | -0.537570 | 3.085874  | 2.157841  | H      | 3.385801  | 1.892666  | -1.025960 | C        | -6.215321 | 2.038522  | 0.547152  |
| H      | -3.055611 | -0.444478 | 2.078258  | H      | 2.124082  | 3.281249  | -2.071681 | H        | -6.857011 | 2.926426  | 0.594891  |
| H      | -3.798006 | -1.992657 | 0.840213  | O      | 4.945127  | 0.309150  | 0.241537  | H        | -6.474774 | 1.426963  | -0.331838 |
| H      | 4.455340  | 1.544966  | 0.318114  | O      | 0.648771  | 4.902620  | -3.388437 | H        | -6.317635 | 1.444190  | 1.469037  |
| H      | 3.096221  | 0.624845  | 1.890278  | C      | 5.736973  | -0.627552 | 1.009682  | Cl       | -0.653191 | -3.022634 | -1.006367 |
| O      | -2.363183 | 1.523239  | 3.558753  | H      | 5.445799  | -1.663524 | 0.772010  |          |           |           |           |
| O      | -4.588189 | -4.008492 | -0.515458 | H      | 6.774956  | -0.446422 | 0.705265  | I2       |           |           |           |
| O      | 2.446527  | -1.315072 | 3.445869  | H      | 5.619235  | -0.437472 | 2.088764  | PhCl     |           |           |           |
| O      | 5.242169  | 3.621593  | -0.964824 | C      | -0.273320 | 5.768599  | -4.091559 | C        | -0.505159 | 0.000000  | -0.000068 |
| C      | -1.901423 | 2.671877  | 4.304217  | H      | -0.836052 | 6.392745  | -3.378839 | C        | 0.178148  | 1.226525  | 0.000019  |
| H      | -2.415648 | 2.616093  | 5.271599  | H      | 0.354795  | 6.399152  | -4.732554 | C        | 1.584197  | 1.216155  | 0.000199  |
| H      | -0.809800 | 2.625669  | 4.451830  | H      | -0.967686 | 5.172791  | -4.705836 | C        | 2.289805  | 0.000000  | 0.000288  |
| H      | -2.173561 | 3.605512  | 3.784739  | Cl     | -3.346164 | 0.333194  | 1.378314  | C        | 1.584197  | -1.216155 | 0.000198  |
| C      | -4.959945 | -5.115522 | -1.367056 |        |           |           |           | C        | 0.178148  | -1.226525 | 0.000018  |
| H      | -5.736485 | -5.659731 | -0.815391 | 46     |           |           |           | H        | -0.371774 | 2.168717  | -0.000048 |
| H      | -5.363544 | -4.748704 | -2.325049 | OA2_Cl |           |           |           | H        | 2.122834  | 2.166132  | 0.000269  |
| H      | -4.093235 | -5.771714 | -1.549922 | Ni     | 0.145186  | -1.091118 | 0.186512  | H        | 3.381663  | 0.000000  | 0.000427  |
| C      | 5.629907  | 4.737240  | -1.798234 | N      | 0.881527  | 0.793620  | 0.148454  | H        | 2.122834  | -2.166132 | 0.000268  |
| H      | 4.854555  | 5.520466  | -1.783072 | N      | -1.612451 | -0.031255 | 0.157920  | H        | -0.371774 | -2.168717 | -0.000049 |
| H      | 6.560409  | 5.118008  | -1.359437 | C      | 2.183244  | 1.116262  | 0.043008  | Cl       | -2.278812 | 0.000000  | -0.000282 |
| H      | 5.807251  | 4.402142  | -2.833238 | C      | 2.642263  | 2.426296  | -0.120283 |          |           |           |           |
| C      | 2.009308  | -2.448975 | 4.226453  | C      | 1.685187  | 3.462319  | -0.177049 | I2       |           |           |           |
| H      | 2.457412  | -3.380167 | 3.842306  | C      | -3.853813 | 1.656742  | 0.343762  | PhCl_rad |           |           |           |
| H      | 2.362473  | -2.253679 | 5.246752  | C      | -4.009302 | 0.253305  | 0.342165  | C        | -0.487852 | 0.000000  | -0.000080 |
| H      | 0.909542  | -2.526828 | 4.215040  | C      | -2.858890 | -0.535078 | 0.246851  | C        | 0.153054  | 1.245925  | -0.000013 |
| Cl     | 0.172724  | -0.221070 | -4.343587 | C      | -0.050037 | 1.791832  | 0.085904  | C        | 1.626011  | 1.234869  | 0.000198  |
|        |           |           |           | C      | 0.317318  | 3.130541  | -0.070079 | C        | 2.303619  | 0.000000  | 0.000286  |
| 41     |           |           |           | C      | -2.551206 | 2.194042  | 0.257380  | C        | 1.626011  | -1.234870 | 0.000198  |
| OA1_Cl |           |           |           | C      | -1.458031 | 1.328587  | 0.170981  | C        | 0.153054  | -1.245924 | -0.000014 |
| Ni     | -1.084488 | 0.715433  | 0.745284  | H      | 2.882418  | 0.282692  | 0.092484  | H        | -0.413271 | 2.178342  | -0.000059 |
| N      | 0.804698  | 0.489389  | 0.705050  | H      | 3.711081  | 2.615218  | -0.196438 | H        | 2.174939  | 2.180498  | 0.000276  |
| N      | -0.731837 | 2.102950  | -0.627118 | H      | -4.983094 | -0.226068 | 0.415660  | H        | 3.401166  | 0.000000  | 0.000444  |
| C      | 1.523714  | -0.395531 | 1.434202  | H      | -2.933244 | -1.622690 | 0.236793  | H        | 2.174938  | -2.180499 | 0.000276  |
| C      | 2.911938  | -0.522893 | 1.341551  | C      | 0.528942  | -1.467870 | -1.783448 | H        | -0.413271 | -2.178341 | -0.000061 |
| C      | 3.604688  | 0.315385  | 0.440383  | C      | 1.890245  | -1.798476 | -1.937492 | Cl       | -2.303993 | 0.000000  | -0.000254 |
| C      | 0.133776  | 4.013522  | -2.505664 | C      | -0.135804 | -0.606436 | -2.680783 |          |           |           |           |
| C      | -1.238658 | 3.870583  | -2.205404 | C      | 2.634601  | -1.112455 | -2.914929 | 46       |           |           |           |
| C      | -1.610494 | 2.905848  | -1.263125 | H      | 2.360860  | -2.532184 | -1.284077 | RE2_Cl   |           |           |           |
| C      | 1.478741  | 1.308163  | -0.173311 | C      | 0.630447  | 0.064808  | -3.646434 | Ni       | -0.515634 | -0.604871 | -0.804392 |
| C      | 2.864510  | 1.242351  | -0.324918 | H      | -1.204599 | -0.421758 | -2.582736 | N        | 1.491384  | -0.413079 | -0.498910 |
| C      | 1.063227  | 3.178206  | -1.847959 | C      | 2.014954  | -0.176363 | -3.762999 | N        | -0.368334 | 1.431959  | -0.538564 |
| C      | 0.602111  | 2.239407  | -0.923226 | H      | 3.702119  | -1.325229 | -3.011995 | C        | 2.362754  | -1.436838 | -0.471687 |
| H      | 0.945409  | -1.021142 | 2.114690  | H      | 0.137090  | 0.777527  | -4.312169 | C        | 3.700271  | -1.298676 | -0.088812 |
| H      | 3.420701  | -1.260231 | 1.959611  | H      | 2.598501  | 0.344010  | -4.525263 | C        | 4.153536  | -0.015767 | 0.288370  |

C 0.096162 4.177621 -0.138102  
C -1.177237 3.714707 -0.534279  
C -1.348694 2.339453 -0.714559  
C 1.921944 0.828709 -0.130982  
C 3.241406 1.061639 0.265467  
C 1.140006 3.239185 0.014223  
C 0.880979 1.884661 -0.205916  
H 1.960371 -2.403731 -0.773089  
H 4.351261 -2.170252 -0.091050  
H -2.018569 4.385106 -0.696400  
H -2.319034 1.941235 -1.007629  
C -0.866323 -1.504676 0.970497  
C -0.627892 -0.642688 2.061420  
C -0.486307 -2.863962 1.031577  
C 0.084422 -1.125709 3.173270  
H -0.936799 0.399686 2.026041  
C 0.226009 -3.327734 2.149363  
H -0.711917 -3.532630 0.201228  
C 0.517775 -2.463222 3.222305  
H 0.303837 -0.443731 3.998883  
H 0.544650 -4.372724 2.180392  
H 1.066061 -2.831811 4.092035  
S -2.642799 -1.229148 -0.314543  
C -3.616613 -0.307902 0.930573  
F -3.728814 -0.954192 2.131172  
F -3.172589 0.952757 1.215858  
F -4.893343 -0.171078 0.445543  
H 3.581577 2.053018 0.559331  
H 2.133169 3.591437 0.287500  
O 5.414594 0.278662 0.679880  
O 0.414624 5.468608 0.103572  
C 6.379544 -0.800766 0.725357  
H 6.515648 -1.236602 -0.277398  
H 7.313069 -0.338314 1.067546  
H 6.054515 -1.576397 1.437162  
C -0.621979 6.467218 -0.064532  
H -0.147245 7.421405 0.193424  
H -0.971002 6.484223 -1.109148  
H -1.464837 6.264673 0.615455  
Cl -0.387278 -2.184900 -2.562368



|          |           |           |           |         |           |           |           |    |           |           |           |
|----------|-----------|-----------|-----------|---------|-----------|-----------|-----------|----|-----------|-----------|-----------|
| C        | 1.194416  | -1.749438 | 1.403545  | C       | -3.328933 | -0.367847 | -1.883592 | C  | 3.923803  | -1.468935 | 0.806940  |
| H        | 1.449430  | -3.314572 | -0.110064 | C       | -2.349371 | 3.866085  | -1.116588 | C  | 2.753086  | -0.752987 | 0.471498  |
| C        | 1.610137  | -0.380930 | 1.751106  | H       | -0.863516 | 5.078983  | -0.040076 | H  | 0.395150  | 2.792843  | -0.855767 |
| H        | 2.886366  | 1.311807  | 1.205363  | C       | -3.479912 | -1.708013 | -2.266780 | H  | 2.333816  | 4.096466  | -1.694828 |
| H        | 1.521680  | -0.034492 | 2.789804  | H       | -2.372635 | -3.587556 | -2.547883 | H  | 2.380843  | -4.261786 | 2.081290  |
| S        | 4.070763  | 0.693583  | -1.354579 | H       | -4.195657 | 0.291997  | -1.887928 | H  | 0.412359  | -2.879334 | 1.460109  |
| C        | 5.720236  | 0.106027  | -0.800299 | H       | -3.545891 | 2.363735  | -2.100034 | Ni | -0.044221 | -0.055513 | 0.274143  |
| F        | 6.684546  | 0.766638  | -1.510591 | H       | 5.608735  | -0.053539 | 0.060113  | N  | -1.586858 | -1.312905 | -0.059267 |
| F        | 5.967070  | 0.333290  | 0.525980  | H       | 5.180755  | -2.130527 | -0.596138 | N  | -1.573272 | 1.204928  | 0.649611  |
| F        | 5.923445  | -1.233505 | -0.993183 | O       | -4.728367 | -2.100821 | -2.641254 | C  | -1.511369 | -2.570431 | -0.545607 |
| H        | -4.204162 | 2.080500  | -0.652192 | O       | -3.212809 | 4.837851  | -1.521850 | C  | -2.841399 | -0.726858 | 0.026643  |
| H        | -4.818965 | 0.066828  | -0.865686 | O       | 4.762496  | -4.639567 | -0.296328 | C  | -1.490011 | 2.463264  | 1.132259  |
| O        | -5.603804 | -2.337611 | -1.231184 | O       | 6.302867  | 2.381562  | -0.354075 | C  | -2.836295 | 0.645559  | 0.513862  |
| O        | -3.557583 | 4.534603  | -0.356620 | C       | -4.904602 | -3.481648 | -3.004333 | C  | -2.611092 | -3.331421 | -0.947158 |
| C        | -3.077406 | 5.888369  | -0.188079 | H       | -5.971226 | -3.591940 | -3.238057 | H  | -0.504853 | -2.984884 | -0.621070 |
| H        | -2.182405 | 6.060291  | -0.807964 | H       | -4.300036 | -3.739721 | -3.890191 | C  | -4.004114 | -1.425346 | -0.368876 |
| H        | -3.899848 | 6.531729  | -0.523958 | H       | -4.634934 | -4.147705 | -2.167213 | C  | -2.589019 | 3.252350  | 1.481236  |
| H        | -2.848963 | 6.088278  | 0.871574  | C       | -2.898160 | 6.193498  | -1.158850 | H  | -0.477661 | 2.856281  | 1.243584  |
| C        | -5.943971 | -3.732494 | -1.403052 | H       | -3.702618 | 6.806971  | -1.584409 | C  | -3.998797 | 1.375244  | 0.848584  |
| H        | -5.889119 | -4.264858 | -0.439652 | H       | -2.875647 | 6.315185  | -0.062682 | C  | -3.898116 | -2.733889 | -0.856193 |
| H        | -6.974465 | -3.735764 | -1.778741 | H       | -1.928206 | 6.502310  | -1.584383 | H  | -2.460359 | -4.341773 | -1.321948 |
| H        | -5.270505 | -4.205611 | -2.136391 | C       | 6.556421  | 3.777266  | -0.593526 | C  | -3.884376 | 2.685456  | 1.330806  |
| C        | 0.748958  | -2.727789 | 2.485539  | H       | 5.948302  | 4.410044  | 0.075285  | H  | -2.431231 | 4.261761  | 1.855610  |
| H        | 0.113549  | -3.522884 | 2.058896  | H       | 7.622665  | 3.925480  | -0.379356 | H  | -4.987475 | 0.925628  | 0.760604  |
| H        | 1.618934  | -3.219937 | 2.964262  | H       | 6.346190  | 4.043450  | -1.643319 | H  | -4.984005 | -0.950315 | -0.328893 |
| H        | 0.174712  | -2.216104 | 3.274573  | C       | 4.395022  | -6.023278 | -0.147867 | H  | 4.876988  | 0.767057  | -0.550622 |
|          |           |           |           | H       | 3.665170  | -6.322856 | -0.918668 | H  | 4.910645  | -1.036456 | 0.643799  |
|          |           |           |           | H       | 5.325980  | -6.590497 | -0.274228 | O  | -5.049148 | 3.326249  | 1.639795  |
|          |           |           |           | H       | 3.973807  | -6.214774 | 0.853359  | O  | -5.060838 | -3.343662 | -1.230198 |
| 72       |           |           |           | H       | -0.289771 | -1.703958 | 1.647318  | O  | 4.993510  | -3.373688 | 1.681544  |
| ADTS_pMe |           |           |           | C       | -0.377542 | -0.650548 | 1.896246  | O  | 4.934425  | 3.099696  | -1.603831 |
| N        | 2.400206  | 0.867251  | -0.709371 | C       | -1.615667 | -0.093942 | 2.240298  | C  | -4.959936 | 4.657081  | 2.189169  |
| N        | 1.836801  | -1.643126 | -0.058564 | C       | 0.784492  | 0.168468  | 2.002823  | H  | -5.996222 | 4.963948  | 2.380091  |
| C        | 2.667106  | 2.167152  | -0.983079 | C       | -1.751814 | 1.221213  | 2.700332  | H  | -4.388706 | 4.653545  | 3.132578  |
| C        | 3.932729  | 2.749855  | -0.927324 | C       | 0.688338  | 1.474723  | 2.561125  | H  | -4.489970 | 5.347465  | 1.468875  |
| C        | 5.024732  | 1.941170  | -0.519483 | H       | 1.770375  | -0.297067 | 1.972276  | C  | -4.973498 | -4.667919 | -1.794957 |
| C        | 3.770305  | -3.713859 | -0.198097 | C       | -0.578492 | 1.986626  | 2.874249  | H  | -6.006902 | -4.952359 | -2.031153 |
| C        | 2.404626  | -4.008592 | 0.044833  | H       | -0.666677 | 3.004754  | 3.263460  | H  | -4.365995 | -4.661742 | -2.715480 |
| C        | 1.503553  | -2.943270 | 0.083501  | I       | -3.410865 | -1.317576 | 1.948778  | H  | -4.545490 | -5.377752 | -1.067425 |
| C        | 3.486051  | 0.062132  | -0.403573 | H       | -2.728012 | 1.640759  | 2.942942  | C  | 4.840772  | 4.411489  | -2.195624 |
| C        | 4.785341  | 0.584281  | -0.260510 | C       | 1.946712  | 2.294219  | 2.735106  | H  | 4.431989  | 5.138187  | -1.473653 |
| C        | 4.143133  | -2.372200 | -0.367554 | H       | 2.688901  | 1.766174  | 3.360657  | H  | 5.870004  | 4.685661  | -2.460411 |
| C        | 3.172566  | -1.358042 | -0.263914 | H       | 2.434028  | 2.480931  | 1.761352  | H  | 4.213172  | 4.389008  | -3.102292 |
| H        | 1.807937  | 2.771889  | -1.272634 | H       | 1.733408  | 3.267613  | 3.205509  | C  | 4.916683  | -4.690142 | 2.266324  |
| H        | 4.053947  | 3.799099  | -1.188941 |         |           |           |           | H  | 4.414012  | -5.392742 | 1.580699  |
| H        | 2.048665  | -5.023410 | 0.210254  |         |           |           |           | H  | 5.957302  | -5.000938 | 2.424527  |
| H        | 0.445641  | -3.144598 | 0.261018  |         |           |           |           | H  | 4.382335  | -4.660152 | 3.230495  |
| Ni       | 0.585527  | 0.058806  | -0.279296 | 72      |           |           |           | C  | -1.428377 | -0.136483 | -7.462715 |
| N        | -0.670471 | 1.702453  | -0.368330 | B1T_pMe |           |           |           | C  | -0.265865 | 0.209265  | -8.180643 |
| N        | -0.973144 | -0.727891 | -1.361196 | N       | 1.491197  | 1.165595  | -0.201547 | C  | 0.915265  | 0.465578  | -7.450694 |
| C        | -0.379028 | 2.981843  | -0.044665 | N       | 1.493700  | -1.289181 | 0.699448  | C  | 0.939721  | 0.382568  | -6.047314 |
| C        | -1.821487 | 1.495023  | -1.098399 | C       | 1.403844  | 2.386102  | -0.772118 | C  | -0.235086 | 0.036694  | -5.359393 |
| C        | -1.139820 | -2.008461 | -1.765750 | C       | 2.493293  | 3.114059  | -1.255121 | C  | -1.422802 | -0.225902 | -6.056513 |
| C        | -2.074916 | 0.101311  | -1.460872 | C       | 3.781065  | 2.518627  | -1.161359 | H  | -2.355433 | -0.339303 | -8.006536 |
| C        | -1.162958 | 4.087524  | -0.374898 | C       | 3.821206  | -2.742285 | 1.381861  | H  | 1.831612  | 0.733916  | -7.984793 |
| H        | 0.527588  | 3.121703  | 0.540913  | C       | 2.529462  | -3.283198 | 1.629334  | H  | 1.864143  | 0.585615  | -5.503058 |
| C        | -2.662660 | 2.550602  | -1.490018 | C       | 1.422132  | -2.508146 | 1.275351  | H  | -2.336349 | -0.494278 | -5.522271 |
| C        | -2.339736 | -2.547672 | -2.229066 | C       | 2.745885  | 0.580713  | -0.114729 |    |           |           |           |
| H        | -0.249623 | -2.634694 | -1.731632 | C       | 3.897656  | 1.243133  | -0.594939 |    |           |           |           |

I -0.206010 -0.076314 -3.154140  
C -0.276307 0.313304 -9.692509  
H -0.056851 1.344348 -10.021214  
H 0.491309 -0.339862 -10.142353  
H -1.256746 0.025159 -10.103632

49

B5\_pMe

Ni -0.207556 -0.140878 -0.013765  
N 1.635395 -0.971266 -0.137584  
N 0.898317 1.531001 -0.202551  
C 1.921448 -2.288262 -0.122189  
C 3.213537 -2.803820 -0.253704  
C 4.280368 -1.891630 -0.412260  
C 2.654140 3.728575 -0.305004  
C 1.257778 3.926483 -0.220435  
C 0.435449 2.797652 -0.173067  
C 2.668670 -0.086008 -0.287451  
C 3.993859 -0.510813 -0.429030  
C 3.149702 2.408617 -0.339135  
C 2.253575 1.336731 -0.284016  
H 1.068303 -2.956608 -0.000298  
H 3.366718 -3.880834 -0.229753  
H 0.810916 4.917716 -0.185042  
H -0.647737 2.904940 -0.100717  
S -1.310375 -0.673114 1.906635  
C 0.033949 -0.963022 3.037961  
F 0.752329 -2.132365 2.811230  
F 1.001612 0.033784 3.068010  
F -0.393144 -1.072940 4.357894  
H 4.809243 0.200887 -0.551515  
H 4.224882 2.243691 -0.390885  
O 5.583259 -2.235823 -0.555800  
O 3.577558 4.717984 -0.352527  
C 5.917270 -3.643648 -0.524932  
H 5.421145 -4.176245 -1.352444  
H 7.006242 -3.685790 -0.648096  
H 5.625633 -4.086872 0.440840  
C 3.109773 6.085127 -0.259725  
H 4.014693 6.703172 -0.302973  
H 2.445114 6.324056 -1.105558  
H 2.582896 6.245399 0.694738  
C -0.847998 -1.628333 -2.450292  
C -1.951166 -2.402777 -2.076740  
C -0.829928 -0.242781 -2.093533  
C -3.074011 -1.837671 -1.413125  
H -1.968935 -3.467508 -2.324177  
C -1.931864 0.337087 -1.386975  
H -0.081462 0.410296 -2.549588  
C -3.054720 -0.483824 -1.096546  
H -3.929002 -2.464843 -1.160132  
H -1.995745 1.418177 -1.261463  
I -4.757146 0.416844 -0.100309  
C 0.308068 -2.206165 -3.232814  
H 0.345097 -1.776555 -4.250445  
H 1.270108 -1.972060 -2.748174  
H 0.221071 -3.300185 -3.327190

49

B6\_pMe

Ni -0.375083 -0.496033 0.091963  
N 0.149850 1.394212 -0.314016  
N 1.654571 -0.759082 -0.196539  
C -0.672038 2.463589 -0.267373  
C -0.248161 3.771988 -0.500948  
C 1.114018 3.989069 -0.797469  
C 4.418400 -0.823675 -0.702086  
C 3.724721 -1.999282 -0.344609  
C 2.351797 -1.906428 -0.104989  
C 1.480226 1.600731 -0.574184  
C 1.984066 2.877575 -0.824323  
C 3.695650 0.385959 -0.798929  
C 2.324140 0.383519 -0.536596  
H -1.713054 2.257110 -0.030423  
H -0.971185 4.582678 -0.444509  
H 4.220893 -2.962312 -0.248109  
H 1.777425 -2.789865 0.174559  
C -2.246752 -0.161068 -0.170659  
C -2.569596 0.096987 -1.512759  
C -3.230145 -0.054193 0.824165  
C -3.879462 0.490974 -1.854195  
H -1.816790 0.010136 -2.300315  
C -4.531716 0.349487 0.470322  
H -2.994465 -0.274501 1.865389  
C -4.878124 0.627546 -0.869790  
H -4.119664 0.695398 -2.901782  
H -5.291935 0.438068 1.252663  
S -0.941118 -2.653822 0.401315  
C -1.209991 -3.204126 -1.291516  
F -2.507438 -3.092194 -1.739463  
F -0.446986 -2.535801 -2.230138  
F -0.894450 -4.539781 -1.423589  
H 3.039857 3.037897 -1.032245  
H 4.226047 1.297262 -1.069018  
O 1.671506 5.189727 -1.054254  
O 5.740793 -0.750992 -0.962754  
C 0.815993 6.360261 -1.019696  
H 0.384755 6.487868 -0.014329  
H 1.473734 7.203502 -1.261350  
H 0.015200 6.272138 -1.770903  
C 6.521793 -1.969008 -0.859470  
H 7.548787 -1.674497 -1.106002  
H 6.473350 -2.366516 0.166696  
H 6.156520 -2.719719 -1.577763  
I -0.041626 -0.019320 2.855166  
C -6.289318 1.047727 -1.232469  
H -7.016151 0.256390 -0.978157  
H -6.591911 1.954064 -0.679553  
H -6.377516 1.257351 -2.310535

49

B7\_pMe

Ni 0.187818 0.076104 0.119187  
N 1.680321 -1.254904 -0.082043

N 1.721397 1.354116 -0.037916  
C 1.561742 -2.597200 -0.082018  
C 2.636020 -3.469140 -0.280000  
C 3.916269 -2.909296 -0.491118  
C 4.033856 2.940436 -0.263865  
C 2.769466 3.536476 -0.057844  
C 1.656571 2.698414 0.047351  
C 2.921519 -0.709563 -0.273168  
C 4.051437 -1.504965 -0.485524  
C 4.114418 1.533960 -0.341110  
C 2.948733 0.771837 -0.223277  
H 0.555013 -2.981284 0.088526  
H 2.464726 -4.543559 -0.263062  
H 2.638403 4.613407 0.023498  
H 0.661051 3.114339 0.207670  
H 5.034573 -1.063508 -0.641238  
H 5.085320 1.062496 -0.485298  
O 5.050549 -3.618420 -0.701076  
O 5.199696 3.615542 -0.395214  
C 4.960696 -5.063189 -0.678100  
H 4.287232 -5.421395 -1.473442  
H 5.982160 -5.418842 -0.859237  
H 4.606060 -5.410680 0.305565  
C 5.157438 5.061190 -0.321014  
H 6.194835 5.388264 -0.460487  
H 4.518631 5.468839 -1.121180  
H 4.785863 5.385292 0.664248  
C -0.696462 0.046859 -1.825423  
C -1.417672 -1.178594 -1.641641  
C -1.270140 1.228958 -1.250483  
C -2.646648 -1.212009 -0.975916  
H -1.001954 -2.100144 -2.054232  
C -2.521252 1.197423 -0.596697  
H -0.782988 2.190238 -1.422686  
C -3.217605 -0.016698 -0.472144  
H -3.167972 -2.161552 -0.844250  
H -2.934317 2.115975 -0.177866  
S -4.758297 -0.071257 0.439262  
C -5.942962 0.191393 -0.936134  
F -5.892764 -0.781156 -1.896883  
F -7.208178 0.192760 -0.424556  
F -5.766942 1.377273 -1.594138  
I -0.880415 -0.256123 2.574475  
C 0.409617 0.136427 -2.860007  
H 1.033610 -0.770017 -2.852609  
H -0.028739 0.237656 -3.870084  
H 1.051045 1.010537 -2.677466

72

HAT\_pMe

N 1.454696 1.277603 -0.160329  
N 1.437185 -1.237800 0.560404  
C 1.381054 2.522391 -0.679734  
C 2.487865 3.276995 -1.072471  
C 3.771181 2.689370 -0.945514  
C 3.735594 -2.678852 1.356227  
C 2.446839 -3.258983 1.456979

|                                 |                                  |                                 |
|---------------------------------|----------------------------------|---------------------------------|
| C 1.350941 -2.494123 1.051465   | H 1.661287 1.272430 -8.292040    | OA2_pMe                         |
| C 2.701441 0.706138 -0.040599   | H 1.543860 1.394177 -5.801025    | Ni -0.740620 -0.557399 0.453676 |
| C 3.868026 1.386118 -0.429863   | H -1.594057 -1.603477 -5.815916  | N 1.243356 -0.115077 0.443400   |
| C 3.847352 -1.367730 0.862658   | I -0.123498 -0.011658 -3.134440  | N -0.829815 1.436830 0.016039   |
| C 2.691359 -0.670330 0.475582   | C 0.158375 -0.276300 -9.992831   | C 2.242553 -1.002874 0.591885   |
| H 0.374694 2.925843 -0.795716   | H 1.164261 -0.021159 -10.364915  | C 3.591234 -0.690681 0.396593   |
| H 2.340607 4.276916 -1.475377   | H -0.109807 -1.277173 -10.369421 | C 3.918398 0.629946 0.023698    |
| H 2.288410 -4.266095 1.837681   | H -0.550673 0.443861 -10.441038  | C -0.678161 4.217146 -0.399231  |
| H 0.342578 -2.903693 1.122147   |                                  | C -1.930061 3.573294 -0.291225  |
| Ni -0.105376 0.008225 0.136937  | 44                               | C -1.943060 2.190298 -0.086392  |
| N -1.693332 -1.239334 -0.098130 | OA1_pMe                          | C 1.556036 1.165617 0.083231    |
| N -1.596720 1.232475 0.754839   | Ni -0.108487 -1.528405 -0.849225 | C 2.876706 1.569625 -0.130021   |
| C -1.674128 -2.461614 -0.673437 | N 1.798153 -1.237394 -0.547310   | C 0.493645 3.439508 -0.286575   |
| C -2.921798 -0.669723 0.151868  | N -0.023270 0.224522 -1.868083   | C 0.385336 2.062702 -0.074165   |
| C -1.458894 2.455931 1.313229   | C 2.811972 -2.046604 -0.154666   | H 1.942142 -2.009000 0.877969   |
| C -2.859639 0.677630 0.736207   | C 4.082126 -1.587036 0.211576    | H 4.344080 -1.464382 0.531613   |
| C -2.815627 -3.196409 -0.998911 | C 4.334070 -0.196279 0.147740    | H -2.871997 4.113719 -0.358087  |
| H -0.684986 -2.862380 -0.894661 | C -0.338461 2.991058 -1.288134   | H -2.887156 1.651501 -0.003389  |
| C -4.122254 -1.328317 -0.165745 | C -1.298751 2.301216 -2.061973   | C -0.718277 -1.470711 -1.429644 |
| C -2.512568 3.202287 1.845350   | C -1.090544 0.940178 -2.313664   | C -0.115503 -2.718486 -1.160357 |
| H -0.443060 2.852539 1.333685   | C 2.062220 0.113664 -0.648850    | C -0.179226 -0.603025 -2.409635 |
| C -3.975112 1.357789 1.252634   | C 3.308689 0.656723 -0.304052    | C 1.132230 -3.004053 -1.745035  |
| C -4.079538 -2.609812 -0.739264 | C 0.788165 2.283760 -0.825950    | H -0.581621 -3.422061 -0.471853 |
| H -2.708907 -4.179379 -1.453391 | C 0.925564 0.923923 -1.136268    | C 1.063931 -0.913208 -2.970520  |
| C -3.812194 2.638487 1.807482   | H 2.575487 -3.110792 -0.105609   | H -0.688437 0.326002 -2.663122  |
| H -2.315339 4.183708 2.272349   | H 4.833437 -2.300001 0.546332    | C 1.749958 -2.106671 -2.637052  |
| H -4.965065 0.902751 1.243874   | H -2.187712 2.791730 -2.456676   | H 1.632895 -3.942476 -1.492038  |
| H -5.086864 -0.851875 0.003703  | H -1.817408 0.377131 -2.903967   | H 1.517062 -0.211007 -3.676303  |
| H 4.845473 0.909427 -0.366745   | C -1.906538 -0.493022 1.159571   | S -1.208586 -1.765071 2.388090  |
| H 4.830459 -0.901640 0.807223   | C -2.542707 0.700192 0.807906    | C -0.167671 -0.927737 3.559272  |
| O -4.934495 3.241663 2.284549   | C -1.007908 -0.571754 2.233064   | F 1.181557 -1.267659 3.496582   |
| O -5.277653 -3.189560 -1.021054 | C -2.256909 1.857870 1.559358    | F -0.171785 0.460090 3.465799   |
| O 4.894683 -3.292714 1.716955   | H -3.230800 0.746750 -0.036153   | F -0.526385 -1.189215 4.876794  |
| O 4.938252 3.288531 -1.305727   | C -0.729260 0.600917 2.957541    | H 3.119066 2.589983 -0.422826   |
| C -4.795246 4.555144 2.868712   | H -0.520818 -1.512859 2.489858   | H 1.464178 3.928705 -0.350014   |
| H -5.807452 4.845932 3.176289   | C -1.344482 1.830410 2.631524    | O 5.172872 1.084122 -0.211056   |
| H -4.128613 4.521614 3.746260   | H -2.748856 2.797854 1.295981    | O -0.499464 5.543859 -0.599527  |
| H -4.405720 5.271285 2.126373   | H -0.014700 0.557147 3.784601    | C 6.267689 0.148650 -0.066078   |
| C -5.264841 -4.506602 -1.614252 | I -2.328968 -2.351033 -0.044651  | H 6.158106 -0.685500 -0.777767  |
| H -6.319693 -4.765602 -1.769404 | H 3.499133 1.725267 -0.402396    | H 7.172101 0.725247 -0.295207   |
| H -4.732899 -4.493872 -2.579681 | H 1.520778 2.789754 -0.196749    | H 6.313107 -0.235934 0.965453   |
| H -4.792266 -5.233835 -0.933233 | O 5.515218 0.396658 0.477133     | C -1.677720 6.383157 -0.663725  |
| C 4.866470 4.611807 -1.880471   | O -0.418492 4.306312 -0.928441   | H -1.298127 7.401524 -0.810594  |
| H 4.428660 5.324955 -1.162469   | C 6.599881 -0.458537 0.897291    | H -2.316280 6.089912 -1.512534  |
| H 5.905041 4.889203 -2.100232   | H 6.864609 -1.171511 0.098822    | H -2.244290 6.321073 0.279271   |
| H 4.274266 4.600702 -2.810263   | H 7.443222 0.214983 1.094848     | I -3.049646 -1.349074 -1.062647 |
| C 4.808386 -4.624852 2.268474   | H 6.330924 -1.006196 1.815694    | C 3.112306 -2.397732 -3.228821  |
| H 4.367600 -5.321978 1.536889   | C -1.562692 5.052581 -1.386168   | H 3.851047 -1.642825 -2.904316  |
| H 5.843314 -4.915411 2.488265   | H -2.497538 4.614210 -0.997950   | H 3.478702 -3.388908 -2.917359  |
| H 4.211972 -4.624002 3.195924   | H -1.431040 6.066822 -0.987721   | H 3.086820 -2.370003 -4.332199  |
| C -0.807777 -1.030206 -7.759727 | H -1.594518 5.082268 -2.488378   |                                 |
| C 0.102852 -0.225230 -8.477908  | C -1.004943 3.090934 3.399945    | 15                              |
| C 0.943671 0.645517 -7.751587   | H -0.004664 3.465908 3.117155    | pMePhI                          |
| C 0.877472 0.715584 -6.343041   | H -1.733270 3.891376 3.193421    | C 0.188465 0.000001 -0.001981   |
| C -0.036765 -0.093106 -5.661431 | H -0.988266 2.905436 4.487134    | C 0.875386 -1.223203 -0.006029  |
| C -0.882312 -0.966951 -6.351347 |                                  | C 2.282315 -1.209745 -0.011564  |
| H -1.463584 -1.716493 -8.306583 | 49                               | C 3.007171 0.000001 -0.011064   |

|            |           |           |           |         |           |           |           |         |           |           |           |
|------------|-----------|-----------|-----------|---------|-----------|-----------|-----------|---------|-----------|-----------|-----------|
| C          | 2.282315  | 1.209747  | -0.011564 | H       | 2.794710  | 2.169665  | -0.060326 | H       | -3.253808 | 5.620747  | -0.082785 |
| C          | 0.875386  | 1.223204  | -0.006029 | H       | 0.420741  | 2.140804  | 0.689594  | C       | 3.066715  | 3.756714  | 2.679899  |
| H          | 0.336358  | -2.171288 | -0.008407 | S       | -1.426556 | -0.061030 | 1.240813  | H       | 4.056073  | 4.230461  | 2.545325  |
| H          | 2.820715  | -2.161243 | -0.018649 | C       | -2.302253 | 0.015299  | -0.367838 | H       | 2.311502  | 4.554811  | 2.556490  |
| H          | 2.820714  | 2.161245  | -0.018649 | F       | -2.064941 | 1.165110  | -1.065016 | H       | 3.003746  | 3.390202  | 3.717491  |
| H          | 0.336358  | 2.171289  | -0.008407 | F       | -1.986241 | -1.011620 | -1.209541 |         |           |           |           |
| I          | -1.986121 | 0.000000  | 0.002501  | F       | -3.642481 | -0.046574 | -0.125298 | 49      |           |           |           |
| C          | 4.521836  | -0.000001 | 0.018046  | C       | 4.428372  | 0.027161  | -0.610491 | RE2_pMe |           |           |           |
| H          | 4.930239  | 0.895391  | -0.478221 | H       | 5.085745  | -0.245033 | 0.234500  | Ni      | -0.059606 | -0.683943 | 0.551276  |
| H          | 4.892563  | -0.000055 | 1.059231  | H       | 4.611898  | -0.704500 | -1.414203 | N       | -0.554872 | 1.277834  | 0.501043  |
| H          | 4.930238  | -0.895343 | -0.478312 | H       | 4.731217  | 1.024647  | -0.965107 | N       | 1.786837  | 0.139043  | 0.202578  |
|            |           |           |           |         |           |           |           | C       | -1.808525 | 1.756547  | 0.598064  |
| 15         |           |           |           | 48      |           |           |           | C       | -2.143424 | 3.090532  | 0.350496  |
| pMePhI_rad |           |           |           | RE1_pMe |           |           |           | C       | -1.109515 | 3.978218  | -0.020359 |
| C          | 0.926808  | 0.000001  | -0.216299 | Ni      | 0.599167  | -0.229407 | -0.329746 | C       | 4.209936  | 1.539072  | -0.074290 |
| C          | 1.576408  | -1.227071 | -0.159034 | N       | -0.825087 | 1.149121  | -0.552907 | C       | 4.204513  | 0.136275  | 0.088660  |
| C          | 2.985919  | -1.215755 | -0.036557 | N       | -0.980387 | -1.369709 | 0.177137  | C       | 2.970606  | -0.505273 | 0.221722  |
| C          | 3.701980  | 0.000003  | 0.028068  | C       | -0.661388 | 2.463169  | -0.826541 | C       | 0.450739  | 2.132563  | 0.148305  |
| C          | 2.985918  | 1.215757  | -0.036556 | C       | -1.699604 | 3.397752  | -0.835615 | C       | 0.208599  | 3.482043  | -0.119539 |
| C          | 1.576405  | 1.227072  | -0.159035 | C       | -3.002781 | 2.951281  | -0.519955 | C       | 2.976852  | 2.226605  | -0.069539 |
| H          | 1.033543  | -2.175096 | -0.207552 | C       | -3.403960 | -2.776159 | 0.543194  | C       | 1.792043  | 1.502714  | 0.078037  |
| H          | 3.531534  | -2.164025 | 0.008256  | C       | -2.160305 | -3.435524 | 0.672688  | H       | -2.568321 | 1.029754  | 0.883901  |
| H          | 3.531532  | 2.164026  | 0.008257  | C       | -0.995686 | -2.689621 | 0.472665  | H       | -3.179357 | 3.408566  | 0.445738  |
| H          | 1.033539  | 2.175096  | -0.207555 | C       | -2.094773 | 0.717658  | -0.243025 | H       | 5.119903  | -0.450884 | 0.113524  |
| I          | -2.636320 | 0.000000  | 0.036163  | C       | -3.190425 | 1.588993  | -0.213138 | H       | 2.922542  | -1.586337 | 0.347679  |
| C          | 5.209826  | -0.000001 | 0.200173  | C       | -3.408110 | -1.401304 | 0.235652  | C       | -1.173768 | -1.208445 | -1.039331 |
| H          | 5.664353  | 0.894575  | -0.256285 | C       | -2.191950 | -0.727318 | 0.070163  | C       | -0.739120 | -0.557216 | -2.211427 |
| H          | 5.486446  | -0.000326 | 1.270515  | H       | 0.362380  | 2.770930  | -1.046023 | C       | -2.551931 | -1.385430 | -0.791862 |
| H          | 5.664420  | -0.894260 | -0.256842 | H       | -1.483544 | 4.436725  | -1.078269 | C       | -1.693323 | 0.002335  | -3.077271 |
|            |           |           |           | H       | -2.083691 | -4.493720 | 0.915076  | H       | 0.320638  | -0.425893 | -2.420170 |
| 14         |           |           |           | H       | -0.018331 | -3.167851 | 0.550044  | C       | -3.485180 | -0.816167 | -1.671933 |
| pMePh_rad  |           |           |           | C       | 2.379493  | 0.545976  | -0.206215 | H       | -2.888488 | -1.922657 | 0.094657  |
| C          | -1.916743 | -0.000001 | 0.010622  | C       | 2.391129  | 0.257162  | 1.202148  | C       | -3.077118 | -0.114029 | -2.826888 |
| C          | -1.282218 | -1.231969 | 0.003167  | C       | 2.759673  | 1.858910  | -0.645834 | H       | -1.348086 | 0.549106  | -3.959380 |
| C          | 0.133162  | -1.216419 | -0.009547 | C       | 2.585602  | 1.318043  | 2.116161  | H       | -4.551434 | -0.928238 | -1.455925 |
| C          | 0.849672  | 0.000001  | -0.012674 | H       | 2.335218  | -0.764602 | 1.576798  | S       | 0.016409  | -2.826792 | -0.099107 |
| C          | 0.133160  | 1.216420  | -0.009547 | C       | 2.958797  | 2.869753  | 0.290440  | C       | 1.007512  | -3.198102 | -1.596899 |
| C          | -1.282221 | 1.231967  | 0.003167  | H       | 2.838843  | 2.069766  | -1.714855 | F       | 0.245109  | -3.485255 | -2.695180 |
| H          | -1.826513 | -2.180047 | 0.002786  | C       | 2.849518  | 2.630118  | 1.690766  | F       | 1.883274  | -2.223256 | -1.978824 |
| H          | 0.678622  | -2.164967 | -0.019675 | H       | 2.554277  | 1.099844  | 3.188168  | F       | 1.754741  | -4.319246 | -1.340841 |
| H          | 0.678618  | 2.164969  | -0.019675 | H       | 3.205402  | 3.877269  | -0.059411 | H       | 1.013096  | 4.155437  | -0.410150 |
| H          | -1.826517 | 2.180045  | 0.002785  | S       | 2.338596  | -0.848892 | -1.471870 | H       | 2.970615  | 3.311464  | -0.159865 |
| C          | 2.366527  | 0.000001  | 0.009172  | C       | 3.398808  | -2.201850 | -0.703515 | O       | -1.275665 | 5.291243  | -0.299095 |
| H          | 2.772145  | 0.894789  | -0.490037 | F       | 4.600451  | -1.750686 | -0.235717 | O       | 5.316808  | 2.299117  | -0.225239 |
| H          | 2.743472  | -0.000053 | 1.047783  | F       | 2.797728  | -2.859587 | 0.334898  | C       | -2.612412 | 5.841196  | -0.204060 |
| H          | 2.772146  | -0.894737 | -0.490128 | F       | 3.669410  | -3.144803 | -1.661291 | H       | -2.998834 | 5.735943  | 0.822253  |
|            |           |           |           | H       | -4.185160 | 1.237287  | 0.057872  | H       | -2.507105 | 6.901774  | -0.461812 |
| 19         |           |           |           | H       | -4.360506 | -0.886228 | 0.116875  | H       | -3.285109 | 5.340172  | -0.918348 |
| pMePhSCF3  |           |           |           | O       | -4.618107 | -3.366854 | 0.684217  | C       | 6.604455  | 1.633996  | -0.209558 |
| C          | 0.279089  | -0.027960 | 0.662118  | O       | -4.108265 | 3.740152  | -0.476368 | H       | 7.342519  | 2.433132  | -0.347647 |
| C          | 0.957437  | -1.239308 | 0.416501  | C       | -4.649276 | -4.778789 | 0.994420  | H       | 6.763044  | 1.130984  | 0.757571  |
| C          | 2.294649  | -1.209857 | -0.003489 | H       | -4.162965 | -4.972440 | 1.964471  | H       | 6.670354  | 0.906233  | -1.034042 |
| C          | 2.977328  | 0.013385  | -0.181780 | H       | -5.713114 | -5.040930 | 1.045849  | I       | -1.336296 | -1.271347 | 2.956923  |
| C          | 2.282377  | 1.213938  | 0.073748  | H       | -4.153486 | -5.359518 | 0.199453  | C       | -4.094539 | 0.458523  | -3.791653 |
| C          | 0.943705  | 1.202623  | 0.496748  | C       | -3.945722 | 5.140645  | -0.794203 | H       | -3.686504 | 1.328710  | -4.331156 |
| H          | 0.442826  | -2.192764 | 0.546053  | H       | -3.573561 | 5.264120  | -1.824545 | H       | -4.386219 | -0.292351 | -4.548552 |
| H          | 2.816498  | -2.150270 | -0.197925 | H       | -4.947012 | 5.578574  | -0.699567 | H       | -5.012561 | 0.768630  | -3.266344 |

Substrate: methyl 4-iodobenzoate

51

A4\_pCO2Me

Ni 0.705891 -0.239881 -0.344251  
N -0.426105 1.354579 -0.079462  
N -1.104180 -1.157525 -0.294643  
C -0.013388 2.642448 -0.013798  
C -0.875178 3.734368 0.103530  
C -2.263387 3.490732 0.153168  
C -3.732318 -2.151536 -0.032827  
C -2.644507 -3.029393 -0.222252  
C -1.365241 -2.480463 -0.343732  
C -1.780957 1.119455 -0.029409  
C -2.709977 2.154761 0.083659  
C -3.474060 -0.765403 0.027966  
C -2.161174 -0.307278 -0.103052  
H 1.060469 2.804177 -0.057301  
H -0.455771 4.737081 0.149296  
H -2.768168 -4.109076 -0.273707  
H -0.500158 -3.126636 -0.490965  
C 2.310782 0.720459 -0.189415  
C 2.783857 1.038428 1.105930  
C 2.997914 1.254200 -1.303899  
C 3.889711 1.881731 1.281397  
H 2.283055 0.631422 1.987847  
C 4.097977 2.108070 -1.134566  
H 2.670856 1.008588 -2.317217  
C 4.557672 2.436014 0.164121  
H 4.242844 2.122275 2.286205  
H 4.603773 2.515531 -2.011044  
S 1.889309 -2.019787 -0.972896  
C 2.743729 -2.538667 0.513487  
F 3.961354 -1.928288 0.742878  
F 2.028005 -2.353281 1.682531  
F 3.032258 -3.892296 0.465113  
H -3.778672 1.951675 0.113587  
H -4.303908 -0.078861 0.185118  
O -3.219728 4.438224 0.259765  
O -5.023349 -2.527027 0.103946  
C -2.796702 5.821111 0.357264  
H -2.245637 6.118477 -0.549006  
H -3.723924 6.399786 0.444534  
H -2.169457 5.966669 1.250826  
C -5.327089 -3.942845 0.043051  
H -6.414276 -4.010607 0.168647  
H -5.028884 -4.356881 -0.933339  
H -4.815694 -4.479886 0.857686  
C 5.718257 3.337277 0.407663  
O 6.151984 3.640190 1.519911  
O 6.265455 3.809655 -0.749439  
C 7.413190 4.685034 -0.603692  
H 7.704695 4.945970 -1.628888  
H 7.137516 5.587648 -0.037957  
H 8.232033 4.159742 -0.089984

75

B1T\_pCO2Me

N 1.484746 1.160708 -0.217672  
N 1.487408 -1.294563 0.683595  
C 1.396906 2.379818 -0.791638  
C 2.484966 3.102630 -1.284731  
C 3.771653 2.504022 -1.198443  
C 3.816086 -2.747177 1.362784  
C 2.524952 -3.286448 1.615694  
C 1.416922 -2.512094 1.263140  
C 2.738177 0.573412 -0.137541  
C 3.888250 1.229841 -0.628580  
C 3.917242 -1.474837 0.784794  
C 2.746020 -0.759719 0.451711  
H 0.388998 2.789297 -0.870425  
H 2.325266 4.084183 -1.726274  
H 2.377294 -4.263573 2.071126  
H 0.407766 -2.882222 1.452676  
Ni -0.051894 -0.060184 0.261629  
N -1.600711 -1.315267 -0.052963  
N -1.576061 1.206007 0.642762  
C -1.532124 -2.576616 -0.530964  
C -2.853142 -0.725885 0.038817  
C -1.486106 2.466319 1.119201  
C -2.841263 0.649987 0.516949  
C -2.636557 -3.337514 -0.918697  
H -0.527466 -2.994404 -0.611216  
C -4.020388 -1.424044 -0.343510  
C -2.580709 3.260951 1.468777  
H -0.471936 2.855848 1.225362  
C -3.999728 1.385620 0.851786  
C -3.921482 -2.736230 -0.822483  
H -2.490954 -4.351163 -1.286504  
C -3.878718 2.698389 1.325712  
H -2.417712 4.271188 1.838701  
H -4.990472 0.939478 0.769873  
H -4.998935 -0.946765 -0.298825  
H 4.866256 0.750589 -0.589956  
H 4.903576 -1.042816 0.617707  
O -5.039736 3.345004 1.635116  
O -5.088245 -3.345489 -1.183625  
O 4.988746 -3.378101 1.659799  
O 4.923056 3.079883 -1.651081  
C -4.944242 4.684098 2.163486  
H -5.979033 4.999167 2.348915  
H -4.373404 4.692205 3.107088  
H -4.470181 5.360403 1.432694  
C -5.008582 -4.673780 -1.740509  
H -6.044399 -4.956730 -1.967625  
H -4.407480 -4.674909 -2.665240  
H -4.577276 -5.380133 -1.011600  
C 4.829175 4.390676 -2.245750  
H 4.426781 5.120037 -1.522967  
H 5.857424 4.661363 -2.517638  
H 4.195759 4.367101 -3.148286  
C 4.913582 -4.693899 2.246836  
H 4.407751 -5.396982 1.564110  
H 5.954669 -5.004924 2.401225

H 4.383145 -4.661943 3.213054  
C -1.422222 -0.148526 -7.436682  
C -0.244637 0.190763 -8.141850  
C 0.943897 0.435535 -7.418496  
C 0.961401 0.346084 -6.019122  
C -0.219308 0.008329 -5.335996  
C -1.411700 -0.240329 -6.036012  
H -2.349407 -0.340876 -7.976874  
H 1.855363 0.695631 -7.958751  
H 1.885567 0.538510 -5.471417  
H -2.326870 -0.500673 -5.501374  
I -0.199602 -0.105172 -3.130450  
C -0.199474 0.305834 -9.632339  
O 0.802808 0.611684 -10.275887  
O -1.399309 0.032847 -10.210857  
C -1.445862 0.122084 -11.660350  
H -2.477965 -0.135704 -11.927848  
H -1.203607 1.144199 -11.986427  
H -0.738363 -0.591056 -12.108216

52

B5\_pCO2Me

Ni -0.219220 -0.225715 -0.062555  
N 1.638610 -0.978179 -0.333828  
N 0.832754 1.485139 -0.041161  
C 1.953113 -2.275256 -0.515171  
C 3.247599 -2.727964 -0.782865  
C 4.282197 -1.770222 -0.866016  
C 2.513357 3.737900 0.044431  
C 1.116836 3.876012 0.209454  
C 0.332003 2.720843 0.159086  
C 2.640105 -0.049167 -0.407643  
C 3.964882 -0.409790 -0.670587  
C 3.046986 2.448401 -0.162659  
C 2.187144 1.347605 -0.202155  
H 1.123652 -2.978777 -0.442912  
H 3.426011 -3.792541 -0.919715  
H 0.640746 4.839831 0.377432  
H -0.749784 2.779021 0.289035  
S -1.354963 -1.072138 1.712629  
C -0.028037 -1.497252 2.824552  
F 0.734675 -2.590938 2.431399  
F 0.900759 -0.488432 3.042909  
F -0.484290 -1.833401 4.093844  
H 4.755700 0.336065 -0.736322  
H 4.122457 2.329385 -0.283824  
O 5.581617 -2.052005 -1.126385  
O 3.403954 4.756956 0.071467  
C 5.943895 -3.439013 -1.323900  
H 5.400778 -3.859972 -2.185578  
H 7.022255 -3.430781 -1.523931  
H 5.728840 -4.025929 -0.416206  
C 2.892893 6.098386 0.261382  
H 3.775254 6.749324 0.242606  
H 2.204616 6.365808 -0.556425  
H 2.379381 6.180969 1.232645  
C -0.721608 -1.417888 -2.684681

|   |           |           |           |           |           |           |           |            |           |           |           |
|---|-----------|-----------|-----------|-----------|-----------|-----------|-----------|------------|-----------|-----------|-----------|
| C | -1.813658 | -2.271064 | -2.452693 | H         | 0.087294  | 6.460487  | 0.328078  | S          | 4.729335  | -0.477445 | 0.375413  |
| C | -0.748247 | -0.081312 | -2.171151 | H         | 0.884501  | 7.342169  | -1.029347 | C          | 5.877163  | -0.808356 | -1.017160 |
| C | -2.965182 | -1.815124 | -1.773284 | H         | -0.498134 | 6.233935  | -1.367360 | F          | 5.880486  | 0.174345  | -1.967119 |
| H | -1.792617 | -3.296984 | -2.820491 | C         | 7.043109  | -1.115427 | -1.742738 | F          | 7.142871  | -0.899878 | -0.517701 |
| C | -1.892303 | 0.377371  | -1.449729 | H         | 7.970372  | -0.686706 | -2.140699 | F          | 5.613575  | -1.972973 | -1.681331 |
| H | -0.002419 | 0.632971  | -2.518703 | H         | 7.217164  | -1.539854 | -0.741410 | I          | 0.842664  | 0.177896  | 2.477963  |
| C | -2.993335 | -0.502780 | -1.294097 | H         | 6.655595  | -1.888644 | -2.424887 | C          | -0.517355 | -0.311307 | -2.766641 |
| H | -3.811595 | -2.485442 | -1.626477 | I         | 0.791358  | -0.154111 | 2.953701  | O          | -1.096928 | -1.342152 | -3.101412 |
| H | -1.987823 | 1.433004  | -1.195035 | C         | -5.908652 | 0.138637  | -0.373591 | O          | -0.871915 | 0.925519  | -3.204031 |
| I | -4.746728 | 0.218992  | -0.261924 | O         | -6.723870 | 0.036469  | 0.541714  | C          | -2.058422 | 0.989546  | -4.036764 |
| C | 0.484137  | -1.833407 | -3.450489 | O         | -6.264126 | 0.451315  | -1.650143 | H          | -2.226249 | 2.058932  | -4.213692 |
| O | 0.548038  | -3.181530 | -3.637835 | C         | -7.684660 | 0.637811  | -1.889074 | H          | -1.885905 | 0.462386  | -4.987039 |
| O | 1.338584  | -1.055918 | -3.875314 | H         | -8.066026 | 1.474545  | -1.285231 | H          | -2.915908 | 0.544075  | -3.513294 |
| C | 1.692694  | -3.663276 | -4.388601 | H         | -7.766315 | 0.863752  | -2.959548 |            |           |           |           |
| H | 1.674232  | -3.261334 | -5.412684 | H         | -8.236677 | -0.281618 | -1.643845 |            |           |           |           |
| H | 2.628313  | -3.369489 | -3.890299 |           |           |           |           | 75         |           |           |           |
| H | 1.586056  | -4.755205 | -4.401631 |           |           |           |           | HAT_pCO2Me |           |           |           |
|   |           |           |           | 52        |           |           |           | N          | 1.483116  | 1.260049  | -0.145284 |
|   |           |           |           | B7_pCO2Me |           |           |           | N          | 1.468466  | -1.254850 | 0.578832  |
|   |           |           |           | Ni        | -0.282221 | -0.193893 | 0.086292  | C          | 1.409953  | 2.505228  | -0.664759 |
|   |           |           |           | N         | -1.745228 | 1.148667  | -0.223782 | C          | 2.516211  | 3.260735  | -1.055881 |
|   |           |           |           | N         | -1.836884 | -1.448541 | 0.037355  | C          | 3.800500  | 2.673610  | -0.928102 |
|   |           |           |           | C         | -1.591521 | 2.476916  | -0.379656 | C          | 3.767938  | -2.688575 | 1.385795  |
|   |           |           |           | C         | -2.631140 | 3.335710  | -0.745528 | C          | 2.479030  | -3.269336 | 1.489840  |
|   |           |           |           | C         | -3.909824 | 2.776429  | -0.963769 | C          | 1.383164  | -2.507672 | 1.078942  |
|   |           |           |           | C         | -4.188815 | -2.986328 | 0.029431  | C          | 2.731217  | 0.689221  | -0.023519 |
|   |           |           |           | C         | -2.934728 | -3.590311 | 0.270237  | C          | 3.897764  | 1.371080  | -0.412477 |
|   |           |           |           | C         | -1.799457 | -2.776041 | 0.262525  | C          | 3.878999  | -1.380345 | 0.886097  |
|   |           |           |           | C         | -2.987410 | 0.606297  | -0.410610 | C          | 2.722437  | -0.684842 | 0.494264  |
|   |           |           |           | C         | -4.083540 | 1.387767  | -0.783872 | H          | 0.403660  | 2.908368  | -0.782330 |
|   |           |           |           | C         | -4.236894 | -1.596298 | -0.209268 | H          | 2.368622  | 4.260996  | -1.457811 |
|   |           |           |           | C         | -3.050449 | -0.859286 | -0.196621 | H          | 2.320932  | -4.273690 | 1.877772  |
|   |           |           |           | H         | -0.584674 | 2.859229  | -0.206862 | H          | 0.375028  | -2.916884 | 1.153906  |
|   |           |           |           | H         | -2.435540 | 4.400434  | -0.853989 | Ni         | -0.074607 | -0.015428 | 0.136592  |
|   |           |           |           | H         | -2.828970 | -4.655504 | 0.464530  | N          | -1.656059 | -1.270410 | -0.110778 |
|   |           |           |           | H         | -0.810737 | -3.197920 | 0.446227  | N          | -1.582044 | 1.215487  | 0.704418  |
|   |           |           |           | H         | -5.065194 | 0.945067  | -0.945665 | C          | -1.622636 | -2.502787 | -0.663912 |
|   |           |           |           | H         | -5.198238 | -1.115609 | -0.383970 | C          | -2.891499 | -0.692233 | 0.087419  |
|   |           |           |           | O         | -5.007080 | 3.473317  | -1.341383 | C          | -1.458655 | 2.444740  | 1.252934  |
|   |           |           |           | O         | -5.374430 | -3.637781 | 0.015338  | C          | -2.845577 | 0.663011  | 0.650158  |
|   |           |           |           | C         | -4.870070 | 4.903372  | -1.524076 | C          | -2.754372 | -3.239009 | -1.017280 |
|   |           |           |           | H         | -4.142589 | 5.120841  | -2.322885 | H          | -0.628380 | -2.912503 | -0.841909 |
|   |           |           |           | H         | -5.867435 | 5.254599  | -1.815065 | C          | -4.082761 | -1.353505 | -0.261522 |
|   |           |           |           | H         | -4.556028 | 5.382735  | -0.583062 | C          | -2.527168 | 3.203253  | 1.735752  |
|   |           |           |           | C         | -5.369958 | -5.058388 | 0.298288  | H          | -0.442056 | 2.835986  | 1.307653  |
|   |           |           |           | H         | -6.421781 | -5.364971 | 0.253065  | C          | -3.976290 | 1.356929  | 1.114720  |
|   |           |           |           | H         | -4.782426 | -5.599599 | -0.460280 | C          | -4.024940 | -2.643649 | -0.812115 |
|   |           |           |           | H         | -4.961010 | -5.247036 | 1.303807  | H          | -2.635560 | -4.230339 | -1.449904 |
|   |           |           |           | C         | 0.660697  | -0.263325 | -1.839816 | C          | -3.827682 | 2.644235  | 1.656715  |
|   |           |           |           | C         | 1.501550  | 0.894696  | -1.725896 | H          | -2.340707 | 4.188708  | 2.158243  |
|   |           |           |           | C         | 1.115490  | -1.485897 | -1.241988 | H          | -4.967219 | 0.905425  | 1.078883  |
|   |           |           |           | C         | 2.731086  | 0.818984  | -1.070425 | H          | -5.051154 | -0.871282 | -0.134784 |
|   |           |           |           | H         | 1.177269  | 1.837918  | -2.161790 | H          | 4.875510  | 0.895066  | -0.348200 |
|   |           |           |           | C         | 2.370722  | -1.554472 | -0.606356 | H          | 4.861593  | -0.913146 | 0.830549  |
|   |           |           |           | H         | 0.528520  | -2.392042 | -1.385178 | O          | -4.964024 | 3.258420  | 2.084395  |
|   |           |           |           | C         | 3.180333  | -0.409332 | -0.525440 | O          | -5.214567 | -3.224261 | -1.128147 |
|   |           |           |           | H         | 3.350268  | 1.712457  | -0.980747 | O          | 4.927136  | -3.300221 | 1.750692  |
|   |           |           |           | H         | 2.698633  | -2.496753 | -0.166216 | O          | 4.967250  | 3.273926  | -1.288602 |

C -4.841072 4.576971 2.660470  
H -5.863528 4.875128 2.924078  
H -4.211416 4.549803 3.565223  
H -4.418706 5.284073 1.927503  
C -5.185410 -4.546731 -1.708066  
H -6.235191 -4.804605 -1.896142  
H -4.621788 -4.544864 -2.655523  
H -4.738379 -5.269321 -1.005146  
C 4.894462 4.597316 -1.862732  
H 4.456254 5.309991 -1.144484  
H 5.932811 4.875604 -2.082479  
H 4.302296 4.586410 -2.792591  
C 4.841259 -4.630167 2.307345  
H 4.401072 -5.330376 1.578320  
H 5.876269 -4.919397 2.528562  
H 4.244701 -4.626210 3.234690  
C -1.080028 -0.703142 -7.641352  
C 0.004416 -0.135447 -8.352497  
C 1.062948 0.466704 -7.632865  
C 1.039765 0.501583 -6.227900  
C -0.043187 -0.064984 -5.542462  
C -1.101596 -0.666349 -6.235600  
H -1.904814 -1.169068 -8.182888  
H 1.899850 0.903862 -8.181789  
H 1.865830 0.968881 -5.683938  
H -1.945472 -1.107739 -5.697386  
I -0.076552 -0.028512 -3.070124  
C 0.079118 -0.141383 -9.844509  
O 0.985167 0.369363 -10.501996  
O -0.977744 -0.782157 -10.416659  
C -0.987601 -0.830255 -11.867547  
H -0.090194 -1.346422 -12.239172  
H -1.893048 -1.392237 -12.128666  
H -1.031295 0.187958 -12.281793

47

OA1\_pCO2Me

Ni 0.903770 -1.050206 -0.155785  
N 2.800050 -0.397432 -0.231508  
N 0.485266 0.869970 -0.064595  
C 3.953868 -1.106567 -0.224525  
C 5.223360 -0.545478 -0.048995  
C 5.312372 0.851035 0.140289  
C 0.217593 3.684743 -0.130895  
C -0.922839 2.852391 -0.118785  
C -0.730100 1.468582 -0.090034  
C 2.894733 0.965946 -0.056504  
C 4.122317 1.607817 0.136928  
C 1.491580 3.080196 -0.111265  
C 1.595420 1.685917 -0.073993  
H 3.845482 -2.182448 -0.371247  
H 6.101607 -1.188545 -0.063574  
H -1.935731 3.250629 -0.128800  
H -1.585775 0.796625 -0.080229  
C -1.860240 -1.929327 0.094151  
C -2.569645 -1.558929 -1.070985  
C -2.261801 -1.470848 1.369470

C -3.672801 -0.708726 -0.955527  
H -2.259058 -1.922341 -2.051561  
C -3.362132 -0.618033 1.466893  
H -1.710742 -1.762997 2.264396  
C -4.095933 -0.219293 0.312513  
H -4.217676 -0.426835 -1.857048  
H -3.676515 -0.253877 2.446494  
I -0.120718 -3.283938 -0.086960  
H 4.178644 2.683786 0.297357  
H 2.378665 3.711615 -0.136329  
O 6.466299 1.541898 0.334401  
O 0.193420 5.043189 -0.165511  
C 7.701686 0.792226 0.338970  
H 7.857217 0.298596 -0.634398  
H 8.491626 1.532066 0.517571  
H 7.695970 0.041078 1.145706  
C -1.099091 5.687962 -0.205759  
H -1.684817 5.442045 0.695178  
H -0.886586 6.763892 -0.234004  
H -1.654072 5.387532 -1.109772  
C -5.248032 0.682561 0.485024  
O -5.636566 1.142043 1.566776  
O -5.874129 0.975867 -0.702635  
C -7.035299 1.834769 -0.608830  
H -6.758814 2.817256 -0.196358  
H -7.399657 1.940149 -1.639081  
H -7.806794 1.372853 0.026158

52

OA2\_pCO2Me

Ni -0.799459 -0.451894 0.327951  
N 1.215803 -0.597594 0.050155  
N -0.314698 1.534041 0.254900  
C 1.898032 -1.736759 -0.160757  
C 3.236568 -1.773168 -0.561583  
C 3.905170 -0.546221 -0.754726  
C 0.657329 4.169726 0.408276  
C -0.721031 3.901099 0.557659  
C -1.145715 2.572191 0.474715  
C 1.862280 0.593276 -0.126815  
C 3.199437 0.654565 -0.525294  
C 1.535605 3.089610 0.176060  
C 1.021233 1.792750 0.105263  
H 1.340845 -2.659224 -0.008211  
H 3.721808 -2.733747 -0.720308  
H -1.451166 4.686621 0.739867  
H -2.200556 2.319484 0.584244  
C -1.215615 -0.895178 -1.645837  
C -0.995987 -2.289245 -1.766807  
C -0.593355 0.013792 -2.538136  
C 0.007994 -2.743515 -2.629446  
H -1.551350 -2.991414 -1.146822  
C 0.408216 -0.457021 -3.385807  
H -0.831960 1.075273 -2.497165  
C 0.745375 -1.834231 -3.424097  
H 0.227806 -3.810383 -2.668778  
H 0.955268 0.244480 -4.017416

S -1.371742 -1.890857 2.063234  
C 0.051618 -1.767460 3.124227  
F 1.130987 -2.564484 2.756531  
F 0.590759 -0.493163 3.240460  
F -0.231561 -2.150497 4.428314  
H 3.700291 1.608197 -0.684726  
H 2.602908 3.280615 0.076815  
O 5.191005 -0.418031 -1.156247  
O 1.222139 5.396427 0.477294  
C 5.933658 -1.629829 -1.432215  
H 5.444669 -2.205035 -2.234601  
H 6.925692 -1.293410 -1.756737  
H 6.018622 -2.243998 -0.521324  
C 0.357803 6.527611 0.747591  
H 1.023980 7.397917 0.781349  
H -0.382545 6.645847 -0.059937  
H -0.151369 6.399380 1.716343  
I -3.352400 -0.269040 -0.818332  
C 1.877409 -2.256974 -4.290322  
O 2.537840 -1.496756 -4.999975  
O 2.127336 -3.595397 -4.209222  
C 3.209302 -4.090256 -5.040332  
H 4.159542 -3.615039 -4.754779  
H 3.244282 -5.170330 -4.850291  
H 2.998015 -3.889566 -6.101129

18

pCO2MePhI

C -0.836317 0.044420 -0.000032  
C -0.080922 -1.139642 0.000320  
C 1.319557 -1.053883 0.000218  
C 1.962606 0.203938 -0.000155  
C 1.178909 1.378154 -0.000453  
C -0.221690 1.307664 -0.000428  
H -0.566613 -2.115219 0.000657  
H 1.905822 -1.972318 0.000533  
H 1.670358 2.351715 -0.000684  
H -0.815357 2.222183 -0.000689  
I -2.997137 -0.083601 0.000043  
O 4.042239 1.428199 0.000962  
O 4.090481 -0.849517 -0.001345  
C 5.544396 -0.801387 0.000366  
H 5.904699 -0.283143 0.900921  
H 5.863324 -1.850647 0.001256  
H 5.906778 -0.284191 -0.899977  
C 3.453043 0.349570 -0.000039

18

pCO2MePhI\_rad

C -0.280350 0.225889 -0.410638  
C 0.385012 -0.995773 -0.439956  
C 1.786370 -0.987550 -0.286187  
C 2.475734 0.236692 -0.107292  
C 1.752745 1.453177 -0.084204  
C 0.351567 1.453317 -0.233507  
H -0.147906 -1.940512 -0.573234  
H 2.336974 -1.929113 -0.304214

|                                 |                                 |                                 |
|---------------------------------|---------------------------------|---------------------------------|
| H 2.291971 2.392097 0.056769    | RE1_pCO2Me                      | N 2.023153 0.648656 -0.323719   |
| H -0.204100 2.394223 -0.205678  | Ni -0.754731 0.333068 -0.298530 | C -1.269806 1.014711 1.853989   |
| I -3.675772 -0.106108 0.101282  | N 0.686719 -1.010094 -0.044827  | C -2.006712 2.187117 2.039268   |
| O 4.608507 1.343557 0.148085    | N 0.752524 1.608988 -0.086561   | C -1.523566 3.376721 1.450917   |
| O 4.533323 -0.931837 0.111634   | C 0.562192 -2.352691 0.042942   | C 3.624220 2.758417 -1.265762   |
| C 5.975353 -0.960176 0.274027   | C 1.621558 -3.220352 0.320068   | C 4.047796 1.418184 -1.402343   |
| H 6.262274 -0.476153 1.219411   | C 2.901665 -2.663000 0.535027   | C 3.210372 0.411693 -0.915571   |
| H 6.239751 -2.024830 0.289321   | C 3.096218 3.166349 0.130210    | C 0.353461 2.113912 0.584763    |
| H 6.465836 -0.451122 -0.568919  | C 1.837535 3.780819 -0.056756   | C -0.319567 3.330407 0.714426   |
| C 3.959653 0.301988 0.061227    | C 0.712453 2.958984 -0.159454   | C 2.394248 3.018335 -0.621773   |
|                                 | C 1.932351 -0.467573 0.172788   | C 1.626841 1.948510 -0.157792   |
| 17                              | C 3.046805 -1.262473 0.461685   | H -1.600806 0.068706 2.280928   |
| pCO2MePh_rad                    | C 3.156146 1.759746 0.200843    | H -2.924929 2.155297 2.621740   |
| C -3.006908 -0.311391 -0.000050 | C 1.978048 1.012401 0.095535    | H 4.994109 1.148854 -1.866728   |
| C -2.194205 -1.433856 0.000093  | H -0.445828 -2.740986 -0.109124 | H 3.500336 -0.634564 -1.001486  |
| C -0.801256 -1.206112 0.000099  | H 1.436128 -4.291815 0.366649   | C -0.722226 -1.374197 -0.539633 |
| C -0.294478 0.114723 0.000034   | H 1.719489 4.860473 -0.121966   | C -0.975493 -0.519976 -1.635356 |
| C -1.182828 1.214755 -0.000075  | H -0.276564 3.394964 -0.307467  | C -1.792100 -1.987830 0.152132  |
| C -2.577857 1.006690 -0.000154  | C -2.540407 -0.400617 -0.170450 | C -2.297355 -0.194180 -1.961308 |
| H -2.588399 -2.452738 0.000156  | C -2.608277 0.474007 0.985729   | H -0.158444 -0.060600 -2.187058 |
| H -0.119920 -2.057296 0.000189  | C -2.859452 -1.798183 -0.016005 | C -3.106815 -1.659035 -0.189808 |
| H -0.782558 2.230051 -0.000126  | C -2.725560 -0.109822 2.261180  | H -1.593209 -2.682921 0.967052  |
| H -3.266111 1.855202 -0.000251  | H -2.713558 1.554974 0.889481   | C -3.379734 -0.753706 -1.242305 |
| O 1.660028 1.534260 0.000240    | C -2.983095 -2.329610 1.255266  | H -2.481773 0.506009 -2.776236  |
| O 1.926380 -0.727010 -0.000064  | H -2.938764 -2.436229 -0.898639 | H -3.935287 -2.108577 0.359434  |
| C 3.368298 -0.539637 -0.000164  | C -2.874651 -1.506169 2.423693  | S 1.084726 -2.689418 -0.500595  |
| H 3.679597 0.008683 0.900787    | H -2.729527 0.541653 3.135866   | C 1.383450 -2.613619 -2.311105  |
| H 3.785922 -1.553603 -0.000791  | H -3.166916 -3.397745 1.381701  | F 0.306111 -3.011984 -3.051650  |
| H 3.679374 0.009674 -0.900584   | S -2.395620 0.316943 -1.843372  | F 1.759278 -1.395930 -2.798286  |
| C 1.176040 0.405165 0.000085    | C -3.668627 1.705617 -1.841601  | F 2.399713 -3.485518 -2.602794  |
|                                 | F -4.855604 1.349652 -1.275362  | H 0.059083 4.239836 0.250918    |
| 22                              | F -3.247806 2.836486 -1.197918  | H 2.075681 4.049297 -0.476074   |
| pCO2MePhSCF3                    | F -3.919155 2.060323 -3.137951  | O -2.128173 4.582750 1.528354   |
| C 0.824187 0.008096 -0.766300   | H 4.025781 -0.820852 0.643002   | O 4.312684 3.838007 -1.694541   |
| C 0.052801 -1.164521 -0.649930  | H 4.122510 1.276480 0.335711    | C -3.359313 4.678764 2.287693   |
| C -1.314764 -1.068505 -0.357952 | O 4.275141 3.826204 0.249553    | H -3.181353 4.407620 3.340451   |
| C -1.916308 0.196107 -0.177040  | O 4.023644 -3.371548 0.820083   | H -3.662106 5.730029 2.212617   |
| C -1.132374 1.363526 -0.296887  | C 4.248407 5.271410 0.186153    | H -4.132017 4.027449 1.849459   |
| C 0.232615 1.275561 -0.597754   | H 3.624986 5.681656 0.997284    | C 5.595822 3.617931 -2.332991   |
| H 0.515464 -2.143311 -0.781441  | H 5.291124 5.586939 0.313648    | H 5.959983 4.617594 -2.598017   |
| H -1.907281 -1.977846 -0.266378 | H 3.866997 5.607923 -0.791568   | H 6.292409 3.130214 -1.632596   |
| H -1.598209 2.339396 -0.158439  | C 3.900633 -4.807832 0.936475   | H 5.471676 3.004476 -3.239189   |
| H 0.830307 2.182139 -0.697670   | H 3.561158 -5.246201 -0.016042  | I 0.896673 -1.923695 3.065918   |
| C -3.375471 0.356253 0.140763   | H 4.908327 -5.166767 1.179288   | C -4.803337 -0.436619 -1.551929 |
| O -3.917839 1.435971 0.357050   | H 3.199084 -5.069938 1.745167   | O -5.770512 -0.947413 -0.987742 |
| O -4.030057 -0.830430 0.160698  | C -2.980747 -2.153938 3.746081  | O -4.925675 0.496123 -2.536667  |
| C -5.451418 -0.775328 0.470179  | O -2.867659 -1.266394 4.785636  | C -6.281581 0.858535 -2.910340  |
| H -5.978548 -0.173669 -0.284185 | O -3.145010 -3.365237 3.930381  | H -6.811042 1.294935 -2.050408  |
| H -5.787513 -1.818557 0.440782  | C -2.973135 -1.831522 6.114709  | H -6.168727 1.599673 -3.711380  |
| H -5.603816 -0.344252 1.470085  | H -2.169778 -2.563699 6.288688  | H -6.825681 -0.025369 -3.274328 |
| S 2.573433 -0.122518 -1.191918  | H -2.868249 -0.979070 6.798332  |                                 |
| C 3.289388 -0.072778 0.496341   | H -3.951734 -2.316391 6.251944  |                                 |
| F 3.063476 1.104282 1.147836    |                                 |                                 |
| F 2.820037 -1.058219 1.313486   | 52                              |                                 |
| F 4.637144 -0.230330 0.387280   | RE2_pCO2Me                      |                                 |
|                                 | Ni 0.802681 -0.737653 0.571674  |                                 |
| 51                              | N -0.125492 0.964708 1.147750   |                                 |
